1 **Fine-mapping of melanoma-associated genomic regions identifies novel causal SNPs in**  
2 **the *MTAP/CDKN2A* and *CASP8* loci**

3  
4 Carolina Castaneda-Garcia<sup>1</sup>, Vivek Iyer<sup>2</sup>, Jérémie Nsengimana<sup>3</sup>, Adam Trower<sup>4</sup>, Alastair Droop<sup>2</sup>,  
5 Kevin M. Brown<sup>5</sup>, Jiyeon Choi<sup>5</sup>, Tongwu Zhang<sup>5</sup>, Mark Harland<sup>4</sup>, Julia A. Newton-Bishop<sup>4</sup>, D.  
6 Timothy Bishop<sup>4</sup>, David J. Adams<sup>2,6</sup>, Mark. M. Iles<sup>4,6</sup>, Carla Daniela Robles-Espinoza<sup>1,2,6</sup>

7  
8 <sup>1</sup>Laboratorio Internacional de Investigación sobre el Genoma Humano, Universidad Nacional  
9 Autónoma de México, Santiago de Querétaro, México, 76230

10 <sup>2</sup>Wellcome Sanger Institute, Hinxton, Cambridgeshire, CB101SA, UK

11 <sup>3</sup>Biostatistics Research Group, Population Health Sciences Institute, Faculty of Medical  
12 Sciences, Newcastle University, Newcastle upon Tyne, NE2 4BN, UK

13 <sup>4</sup>Leeds Institute of Medical Research and Leeds Institute for Data Analytics, University of Leeds,  
14 LS9 7TF, Leeds, UK

15 <sup>5</sup>Division of Cancer Epidemiology and Genetics, National Cancer Institute, National Institutes of  
16 Health, Bethesda, MD 20892, USA

17 <sup>6</sup>To whom correspondence should be addressed: da1@sanger.ac.uk (D.J.A.),  
18 m.m.iles@leeds.ac.uk (M.M.I.), drobles@liigh.unam.mx (C.D.R.-E.)

19  
20  
21 **Abstract**

22 A number of genomic regions have been associated with melanoma risk through genome-wide  
23 association studies, however, the causal variants underlying the majority of these associations  
24 remain unknown. Here, we sequenced either the full locus or the functional regions including  
25 exons of 19 melanoma-associated loci in 1,977 British melanoma cases and 754 controls.  
26 Variant filtering followed by Fisher's exact test analyses identified 88 variants associated with  
27 melanoma risk. Sequential conditional logistic regressions identified the distinct haplotypes on  
28 which variants lie, and massively parallel reporter assays (MPRA) provided biological insights  
29 into how these variants influence gene function. We performed further analyses to link variants  
30 to melanoma risk phenotypes and assess their association with melanoma-specific survival. Our  
31 analyses replicate previously known associations in the *MC1R* and *TYR* loci, while identifying  
32 novel potentially causal variants at the *MTAP/CDKN2A* and *CASP8* loci. These results increase  
33 our understanding of the architecture of melanoma risk and outcome.

## 34 Introduction

35 Cutaneous malignant melanoma (melanoma) is the most aggressive type of skin cancer and  
36 originates from melanocytes, the pigment-producing cells of the skin. Ultraviolet radiation  
37 exposure is thought to be the main etiological risk factor for melanoma; notably, the number of  
38 diagnoses of melanoma have dramatically increased in the last decades<sup>1</sup>. Genetic contributions  
39 to this type of cancer have also been identified, mainly through linkage and sequencing studies  
40 in the context of high-penetrance disease in melanoma-prone families<sup>2</sup> and by genome-wide  
41 association studies (GWASs) in population ascertained cases<sup>3-5</sup>.

42  
43 High-penetrance genetic variants in genes such as cyclin-dependent kinase inhibitor 2A  
44 (*CDKN2A*)<sup>6</sup>, cyclin-dependent kinase 4 (*CDK4*)<sup>7</sup>, telomerase reverse transcriptase (*TERT*)<sup>8</sup>,  
45 protection of telomeres 1 (*POT1*)<sup>9,10</sup>, and other telomere-associated genes are found in  
46 approximately half of melanoma-prone families<sup>11</sup>, and are known to mediate risk for developing  
47 the disease. Common variants that increase the risk of developing melanoma have also been  
48 investigated, with the most recent melanoma GWAS meta-analysis including 36,760 cases and  
49 375,188 controls. The authors found 54 genome-wide significant regions<sup>4</sup>. However, as these  
50 studies are based on genotyping data, the actual genetic alterations within these regions that  
51 increase risk are unknown. The identification of the causal germline genetic lesions that increase  
52 cancer predisposition is clinically important, as they may be used as biomarkers for diagnosis,  
53 risk stratification, and targeted treatment<sup>12</sup>.

54  
55 In this study, we identified genetic variants within melanoma-associated haplotypes by sequence  
56 analysis of melanoma-associated regions in a British case-control cohort. Our analyses point to  
57 a number of potentially causal variants within the *MTAP/CDKN2A* and *CASP8* loci, in addition to  
58 confirming already known variants in the *MC1R* and *TYR* loci. These results refine our knowledge  
59 of the genetic architecture of melanoma and contribute to the identification of potential  
60 mechanisms of disease development.

61  
62 **Results**

63 We sequenced two full melanoma predisposition loci (methylthioadenosine phosphorylase  
64 [*MTAP/CDKN2A* and *TERT*) (**Methods**) as well as the promoters, exons and DNase I  
65 hypersensitivity sites associated to genes falling in 17 other melanoma-associated regions in  
66 1,977 melanoma cases and 754 matched controls from the UK population as part of the Leeds  
67 Melanoma case-control study (**Table 1, Methods**). After variant calling and filtering, we retained  
68 25,653 genetic variants across all regions of interest, from which, only 11,615 were previously  
69 tested in the latest meta-analysis<sup>4</sup>. We conducted individual Fisher's exact tests (**Methods**) of  
70 association to melanoma for each of the retained variants and defined 88 single nucleotide  
71 polymorphisms (SNPs) as the most informative SNPs regarding risk haplotypes at  $P < 0.001$   
72 within seven genomic regions (**Figure 1, Supplementary Table 1**). In this study, we define a  
73 haplotype as the group of all variants within a region whose association to the phenotype  
74 depends on the most associated variant in that group (referred to as the lead SNP).

75

76 For all associated variants in each region, we performed stepwise conditional logistic regressions  
77 to detect the distinct haplotypes where these variants are located. In order to identify potential  
78 biological mechanisms through which these variants may act, we also conducted association  
79 trend tests with a number of melanoma-linked phenotypes in the UKBioBank and ENGAGE  
80 cohorts (**Methods**). For candidate variants in the *MTAP/CDKN2A* and *CASP8* regions, we also  
81 integrated previously-published data from a massively parallel reporter assay (MPRA) designed  
82 to identify risk-associated variants with allelic *cis*-regulatory activity (Choi et al., 2020). Finally,  
83 we also evaluated melanoma-specific survival (MSS) in carriers and non-carriers of melanoma-  
84 associated lead variants in the Leeds Melanoma cohort (**Methods**). In the following sections, we  
85 discuss the *MC1R* and *TYR* regions as proof of concept and *MTAP/CDKN2A* and *CASP8* where  
86 we identified novel potential candidate variants. Results for the other regions where associated  
87 variants were found can be found in the **Supplementary Note**.

88

89 *Proof of concept: Fine-mapping of the melanocortin 1 receptor (MC1R) and tyrosinase (TYR) loci*  
90 *identifies established risk variants*

91 The locus most highly associated with melanoma in our dataset was *MC1R* (**Figure 1**), which  
92 reflects previous reports<sup>5</sup>. As part of our experiment, we targeted all exons and the promoter of  
93 *MC1R*. Subsequent association tests revealed 8 variants as significantly associated with  
94 melanoma (Fisher's exact tests  $P < 0.001$ , **Figure 2a**, **Supplementary Table 1**). Stepwise  
95 conditional logistic regressions were then deployed to identify two independent haplotypes in  
96 this region, with the lead SNPs for these two independent signals corresponding to the known  
97 *MC1R* melanoma-predisposing alleles p.Arg151Cys (rs1805007) and p.Arg160Trp (rs1805008),  
98 while the next significant SNP (association  $P < 0.002$ ) after adjusting for the previous two  
99 corresponded to a third haplotype with lead SNP p.Asp294His (rs1805009), which has also been  
100 strongly associated to melanoma development (**Figure 2a**). The allelic frequencies (AFs) and  
101 odds ratios (ORs) calculated from this dataset closely reflect what has been reported in the  
102 literature (**Figure 2a**, **Supplementary Table 1**).

103

104 Next, we assessed the association of these SNPs with known melanoma-linked phenotypes  
105 using the UKBioBank and ENGAGE datasets, in order to search for clues of the biological  
106 mechanisms through which they may be acting to increase melanoma risk. The minor alleles of  
107 the three leading SNPs in *MC1R* haplotypes (rs1805007, rs1805008 and rs1805009), as well as  
108 the other 8 associated SNPs, are all associated with hair color: red hair against all others, number  
109 of incidents of childhood sunburn, skin pigmentation, and tanning ability at genome-wide  
110 significance (**Figure 2b**, **Supplementary Table 2**). These are all established associations given  
111 the biological role that *MC1R* plays in melanin production and the role of melanin in promoting  
112 the tanning response to protect DNA from damage<sup>13</sup>. The lead SNP rs1805007 was also  
113 associated with naevus count, which was also observed to a lesser degree with the other SNPs  
114 in its haplotype. Finally, the least common of these haplotypes, the minor allele of rs1805009  
115 (p.Asp294His), showed a positive association with MSS (**Figure 2c**), consistent with our previous  
116 observations<sup>14</sup>.

117

118 For the tyrosinase locus (*TYR*), we sequenced the promoter, all exons and nearby DNase I  
119 hypersensitivity sites (DHSs) from the *TYR* and *NOX4* genes (**Methods**). Overall, the association  
120 test found 16 variants associated with melanoma, all of them in the same haplotype led by  
121 rs1126809 (**Figure 3a, Supplementary Table 1**). This variant codes for p.Arg402Gln, a known  
122 melanoma predisposition allele<sup>15</sup>. After the first logistic regression, the next most significant  
123 variant was rs490934 (association  $P < 0.03$ ), which falls in an intron in *NOX4*. As expected, all  
124 assessable variants in the first haplotype are associated with childhood sunburn occasions, ease  
125 of skin tanning and skin pigmentation, whereas rs490934 was associated with the same  
126 phenotypes with the exception of childhood sunburn occasions (**Figure 3b**). No significant  
127 associations with patient survival were found. The lead SNPs we identified in *MC1R* and *TYR* are  
128 the same ones identified by Landi *et al* in their latest meta-analysis<sup>4</sup>. These results indicate that  
129 we are able to identify melanoma-associated germline alleles, patient phenotypes related to  
130 outcomes of biological mechanisms through which such alleles may act, and their potential  
131 associations with patient survival.

132  
133 *Methylthioadenosine Phosphorylase (MTAP) / Cyclin-dependent kinase inhibitor 2A (CDKN2A)*  
134 *region*. The *MTAP/CDKN2A* locus encompasses two functional tumour suppressor genes,  
135 *CDKN2A* and *CDKN2B*, that are known to play a role in familial and sporadic melanoma risk, as  
136 well as a number of other genes with potential involvement in this disease. For this region, we  
137 targeted the full genomic space between GRCh38 chr9:21665209-22151817, which included  
138 *MTAP*, *CDKN2A*, *CDKN2B* and *CDKN2B-AS1/ANRIL* as genes of interest (**Table 1, Methods**).  
139 Overall, our association tests identified 44 SNPs associated with melanoma (**Supplementary**  
140 **Table 1, Figure 4a**). These all fell into one haplotype, with lead SNP rs10811623, an intronic  
141 variant in the *MTAP* gene that falls within a large promoter-flanking regulatory region. The next  
142 most significant SNP after the first logistic regression was rs2518722, which falls into a separate  
143 haplotype (association  $P$ -value  $< 0.0035$ ) and within long non-coding RNA *AL359922.1*, encoded  
144 in the reverse strand and which overlaps *MTAP*. All the SNPs in both haplotypes that could be  
145 evaluated for their association to melanoma-linked phenotypes showed an association with  
146 naevus count (**Supplementary Table 2, Figure 4b**). MRPA performed on 13 of these SNPs  
147 show regulatory potential for rs10811617 (with a significant departure from the background and  
148 allelic difference) and, to a lesser extent, to rs80138396 (with a significant allelic difference).  
149 These SNPs are in moderate ( $r^2 = 0.53, 0.58$  respectively) linkage disequilibrium (LD) with our  
150 lead SNP (rs10811623) and high LD ( $r^2 = 0.93, 1$  respectively) with rs871024, which is the one  
151 identified as the lead by Landi *et al*<sup>4</sup> (**Supplementary Table 3**). In our analysis, rs871024 is also  
152 found associated with melanoma ( $P$ -value  $2.8 \times 10^{-4}$ ) with a similar OR (1.25, compared to 1.18  
153 in Landi *et al.*, 2020<sup>4</sup>). According to the LD-pop tool (Alexander & Machiela, 2020), the LD in the  
154 British population between these two alleles ( $r^2$ ) is 0.59 in the 1000 Genomes Project, making  
155 them moderately correlated. This indicates that both rs10811623, as the most significantly  
156 associated SNP in this study, and rs10811617 could potentially encode functional alleles in this  
157 region. The lead SNP for the second haplotype, rs2518722, has not been previously identified  
158 as associated with melanoma, and was not significant by our criteria after the original Fisher's

159 exact test. Of note, carriers of the alternative allele at rs2518722 were found to have better MSS  
160 than non-carriers (**Figure 4c**).

161  
162 An important issue in melanoma genetics is the classification of novel variants in known risk  
163 genes. Sixteen *CDKN2A* coding variants were identified in this study (**Supplementary Table 4**),  
164 including one novel, heterozygous variant in a case (p.Trp160Arg), predicted deleterious by the  
165 SIFT and PolyPhen-2 algorithms<sup>16,17</sup>, a rare frameshift variant in a case (rs779306249,  
166 p.Glu33GlyfsTer30) and an inframe variant in a case (rs779983400, p.Glu113del). The only  
167 coding variant moderately associated with melanoma was rs3731249 (p.Ala148Thr, OR: 1.395,  
168 *P*-value = 0.0821), which has been described as a risk variant previously in other populations<sup>3,18</sup>.

169  
170 *Caspase 8 (CASP8) region*. For this region, we targeted the promoter, exons and associated  
171 DHSs of all genes of interest overlapping GRCh38 chr2:201047085-201724509, which includes  
172 *CASP8*, *ALS2CR12* (Also known as *FLACC1*), *CFLAR*, and *TRAK2*. Overall, our association tests  
173 identified 14 SNPs associated with melanoma (**Figure 5a, Supplementary Table 1, Methods**)  
174 in one haplotype with lead SNP rs3769818, and after the first logistic regression, the next most  
175 significant variant was SNP rs191947901 (association *P*-value <0.004). No associations were  
176 found for any of these SNPs with melanoma-linked phenotypes (**Figure 5b**); however, carriers of  
177 the alternative allele at the lead SNP of the first haplotype (rs3769818-G), were found to have  
178 worse MSS than non-carriers (**Figure 5c**). Landi et al.<sup>4</sup> identified rs10931936 as the lead SNP in  
179 this region, which was not captured in our data as our experiment preceded their publication.  
180 However, according to LD-pop, these are in complete LD in the British population in the 1000  
181 Genomes Project ( $r^2 = 1$ ). A missense variant in *CASP8*, rs3769823 coding for p.Lys14Arg and  
182 which lies in a vitamin D binding site<sup>19</sup>, was also found in this haplotype. This variant, though  
183 moderately correlated with the lead SNP ( $r^2=0.6917$ ), has been found to explain the signal for  
184 basal cell carcinoma risk at this locus<sup>18</sup>. MRPs also showed that the reference allele (A) is  
185 functional and associated with *cis*-regulatory activity as an activator (**Supplementary Table 4**).  
186 Therefore, rs3769823 is a plausible candidate for being the causal SNP in this region, both  
187 because it alters the protein sequence of caspase 8 and because appears to be *cis*-regulatory.

188  
189 *Other regions*. Variants significantly associated with melanoma were also found in three other  
190 regions: oculocutaneous albinism 2 (*OCA2*, chr15:27670078-28337214), E-cadherin (*CDH1*,  
191 chr16:68528729-68923897) and cyclin D1 (*CCND1*, chr11:69210414-69803433)  
192 (**Supplementary Figures 1, 2 and 3**). Three, one and one significantly associated variants were  
193 found, respectively (**Supplementary note**).

194  
195  
196  
197 **Discussion**  
198 Predicting an individual's risk of disease provides an opportunity to preempt surveillance, to  
199 counsel patients about behaviors that may mitigate their likelihood of developing a condition,  
200 and also provides fundamental insights into disease biology. In this study, we perform the largest

201 melanoma resequencing project to our knowledge, exploring the allelic landscape of melanoma  
202 loci by analyzing over 2,700 individuals. Our analysis identifies established melanoma risk  
203 variants such as disruptive coding alleles of *MC1R* and *TYR*. Importantly, we were also able to  
204 extend our analysis of germline alleles in melanoma patients to identify candidate functional  
205 variants at loci including *MTAP/CDKN2A* and *CASP8*, where risk alleles were associated with  
206 phenotypes such as naevus count and survival.

207  
208 In performing the studies outlined in our paper, we aimed to illuminate biological insights into  
209 how melanoma risk loci contribute to disease development. One notable observation we made  
210 was that the lead variant at the *CASP8* locus (rs3769818) was associated both with melanoma  
211 (G allele) and with patient outcome (specifically the A allele with better survival) but not with  
212 melanoma-linked phenotypes, such as tanning or naevus count. By analysis of MPRA data, the  
213 linked variant rs3769823, also identified in this study, was found to be associated with altered  
214 *cis*-regulatory activity and to fall into a canonical vitamin D binding site. More specifically, the  
215 rs3769823-A allele, which is linked to rs3769818-A, appears to be associated with *cis*-regulatory  
216 activity as an activator. The observation that a variant that activates *CASP8* may also be  
217 associated with better outcome is fitting given the role of *CASP8* in pro-apoptotic pathways.  
218 Therefore, this variant may appear to activate the expression of *CASP8*, a gene which plays a  
219 key role in programmed cell death mediating processes such as apoptosis, necroptosis and  
220 pyroptosis<sup>20</sup>. However, it is the alternative allele (G) the one that shows an association with higher  
221 *CASP8* levels in both a previously published eQTL analysis in primary melanocyte cultures<sup>21</sup> and  
222 a range of tissues in the GTex database, as well as lower *ALS2CR12* levels in thyroid tissue<sup>22</sup>.  
223 *CASP8* has also been found to be overexpressed in a range of cancers including prostate and  
224 renal cancer where it is associated with a poor outcome. A potential explanation for this  
225 observation could be the role of *CASP8* in increasing NF- $\kappa$ B levels, an event we<sup>23</sup> and others<sup>24,25</sup>  
226 have previously linked to enhanced melanoma cell growth. Thus, individuals who carry  
227 rs3769823-G may be predisposed to melanoma development via a role for this variant in  
228 influencing a switch from pro-apoptotic to anti-apoptotic functions of NF- $\kappa$ B which may  
229 associate this variant with patient outcome as opposed to other phenotypes. The potential role  
230 for vitamin D signalling in this context requires further exploration with an extensive literature  
231 linking low vitamin D levels to both risk of melanoma development and poor melanoma-  
232 associated outcomes<sup>26</sup>.

233  
234 Another intriguing observation we made, explored to some degree previously<sup>14</sup>, was the  
235 dichotomous relationship between risk alleles and outcome. For example, alleles at the *CDKN2A*  
236 and *MC1R* loci strongly associate with disease risk but are inversely associated with patient  
237 outcome. In the case of *MC1R*, tumours from patients with *R* alleles carry more somatic  
238 mutations<sup>27</sup> leading to the hypothesis that they are more immunogenic or have neo-antigens that  
239 are more easily recognized by the immune system. Mechanistically, it is less clear why individuals  
240 with common genetic variants at the *CDKN2A* locus that are associated to melanoma, such as  
241 rs2518722-T which we highlight in our study, would have a better outcome. It is intriguing to  
242 note that carriers of high-penetrance *CDKN2A* melanoma susceptibility variants also appear to  
243 have a better outcome when compared to individuals who develop melanoma sporadically. Of

244 course, these variants act in conjunction with many others present in carriers to modulate  
245 disease onset, tumour evolution and therapy response, so further studies are warranted.

246  
247 Thus, in this study we provide a detailed exploration of melanoma risk loci and biological insights  
248 into the processes that drive this malignancy. These data provide a foundation for further  
249 functional studies such as CRISPR genome-editing of risk loci or other *in vivo* or *in vitro*-based  
250 experiments that, in the near future, should deepen our knowledge of the influence of genetic  
251 variants on melanoma development.

252  
253 **Methods**

254 *Ascertainment of cases and controls.* Ethical approval for the Leeds Melanoma Cohort Study  
255 was granted by the North East - York Research Ethics Committee (MREC 1/3/57), the Patient  
256 Information Advisory Group (PIAG 3-09(d)/2003) and further approved by the Sanger Institute  
257 Human Materials and Data Management Committee. Patients have been part of previous GWAS  
258 melanoma projects<sup>3-5</sup>. The inclusion criteria for patients have been previously published<sup>28</sup>. Briefly,  
259 population-ascertained incident melanoma cases in a geographically defined area of Yorkshire  
260 and the northern region of the UK were recruited to a case-control study to form the Leeds Case  
261 Control cohort; and from these, germline DNA was obtained from 1,977 cases and 488 controls  
262 along with extensive patient clinical data. Two hundred and sixty-six samples from control  
263 subjects were also obtained through the Wellcome Trust Case Control Consortium<sup>29</sup> (WTCCC)  
264 for a total number of 754 controls. All individuals part of this study were previously confirmed to  
265 be of European origin through a combination of self-reporting and PCA of genome-wide  
266 genotype data.

267  
268 *Selection of candidate regions.* Nineteen regions previously reported as associated regions, from  
269 which 15 were genome-wide significant loci from a melanoma GWAS meta-analysis (Law et al.,  
270 2015) and four that were identified as candidate melanoma susceptibility regions by a preliminary  
271 version of the same GWAS, were selected for inclusion in a custom design sequencing panel  
272 (**Table 1**). All genes falling within the limits of linkage disequilibrium around the melanoma  
273 GWAS-associated region were included in the panel. Exons, promoters, and DNase I  
274 hypersensitivity sites associated with these genes were included as follows:

- 275
- 276 - Exons. For each gene of interest in each associated region, all exons belonging to it,  
277 regardless of the transcript biotype (e.g., protein-coding or others) as annotated in  
278 Ensembl<sup>30</sup> release 69 were included. 100 bp of intron on either side of each exon was  
279 included to ensure the appropriate capture of potential splice site alterations.
  - 280
  - 281 - Promoters. For each gene, the transcription start site (TSS) as annotated in Ensembl  
282 release 69 was noted. Additional TSSs per gene were manually curated to include other  
283 possible alternative TSSs associated with non-canonical transcripts in the gene. From all  
284 these, 5,000bp upstream to the TSS were included in the design (**Supplementary Table**  
285 **5**).

286  
287 - DNAse I hypersensitivity sites (DHS). For each gene, a window of 100kb of sequence  
288 around the gene was searched for DHSs annotated in melanoma cells profiled by  
289 ENCODE<sup>31</sup>. The cell lines that were considered in this search were Colo829, Mel2183,  
290 Melano, and RPMI7951. No thresholding was applied to this selection, and the union of  
291 all annotated regions in all cell lines was included (**Supplementary Table 6**).

292  
293 - Full loci. Two full loci containing the limits of linkage disequilibrium around the GWAS  
294 signal were included in this design. The *MTAP/CDKN2A* region was defined from  
295 GRCh38 chr9:21665209-22151817, and the *TERT* region was defined from  
296 chr5:1142197-1447788.

297  
298 In total, the target genomic space amounted to 2.061 Mb. Target region coordinates were  
299 submitted through the SureDesign platform to Agilent Technologies for their manufacture with a  
300 tiling density of 2x, ‘moderately stringent’ masking, and ‘maximize performance’ boosting.  
301 Information associated with this design is included in **Supplementary Table 7**.

302 *Targeted DNA sequencing*. DNA was extracted from blood from consenting participants and  
303 processed as previously reported in Newton-Bishop et al., 2010<sup>32</sup>. Sequencing was done in two  
304 batches using the Illumina Genome Analyzer platform. Reads were aligned to the GRCh38  
305 reference genome using the BWA-MEM algorithm<sup>33</sup>, achieving comparable coverage in cases  
306 and controls in all regions. Duplicate marking was done using biobambam streaming  
307 markduplicates<sup>34</sup>.

308 *Variant calling and quality control*. For each aligned file, the GATK v4.1.0.0 HaplotypeCaller was  
309 run to create a genomic variant call format (gVCF) file. For joint calling, the individual target  
310 regions were combined into 103 batches. Each batch (20 target regions) was supplied to the  
311 GATK GenomicsDBImport tool along with all the gvcf called in the previous step. The resulting  
312 genomicsDB was then supplied to the GATK GenotypeGVCFs tool, creating a single vcf file with  
313 genotypes for all samples for all target regions in the batch. These steps were performed for all  
314 103 batches. The vcf files for all batches were combined together using bcftools concat v1.9<sup>35</sup>  
315 to create a final single vcf file containing 40,936 variants. Samples were separated into  
316 sequencing batches and phenotype cohort (cases and controls). The following filters were  
317 applied for variants in each batch, and each cohort (4 groups in total):

318  
319 - A *P*-value from a Hardy-Weinberg Equilibrium test<sup>36</sup> was calculated for each variant site  
320 using PLINK v1.90b3v ([www.cog-genomics.org/plink/1.9/](http://www.cog-genomics.org/plink/1.9/))<sup>37</sup> only in both control batches.  
321 All variants with *P* < 0.001 were excluded.  
322  
323 - Average GQ values were calculated<sup>38</sup>. All variants with an average GQ < 30 were filtered  
324 out. Sites with more than 0.05 missing genotypes on the basis of their proportion were  
325 also filtered out.

326



327 Batches were joined keeping only variants that were common among them after these filters.  
328 Then further filters were applied:

- 329
- 330 - All variants overlapping low-complexity regions (LCRs)<sup>39</sup> were filtered out.
  - 331
  - 332 - For each site, the rate of genotype missingness was calculated and a Fisher's exact test<sup>37</sup>  
333 was performed between cases and controls; any site with  $P < 0.05$  was excluded.
  - 334
  - 335 - The probability of the called samples exhibiting excess heterozygosity with respect to the  
336 null hypothesis that the samples are unrelated was estimated using the GATK v4.1.1.0-  
337 ExcessHet<sup>40</sup>. All variants had an ExcessHet value below 54.96, which corresponds to a  
338  $P$ -value of  $3.4 \times 10^{-06}$ .
  - 339
  - 340 - The GATK v4.1.1.0 Variant Quality Score Recalibration (VQSR)<sup>40</sup> was applied following  
341 their Best Practices for exome sequencing<sup>41</sup> (DePristo et al., 2011). We retained variants  
342 in the 99.4% and 99.7% tranche sensitivity threshold for SNVs and indels respectively.  
343 Tranche plots for the SNVs can be seen in **Supplementary Figure 4**.
  - 344
  - 345 - All variants that overlapped alterations found in the gnomAD database version 3.0<sup>42</sup>, but  
346 that were annotated as not passed in this database, were filtered out. This filter was  
347 included to eliminate potential systematic artifacts that can be detected by gnomAD  
348 given its scale.
  - 349
  - 350 - Finally, the allele frequency (AF) of each variant site in controls was compared to that  
351 reported for the non-Finnish European population (NFE) in the gnomAD dataset<sup>42</sup>. The  
352 difference in AF between both populations was converted into z-scores using the  
353 following formula:  $z = (X - \mu) / \sigma$ , where  $x$  is a single data value,  $\mu$  is the population mean  
354 and  $\sigma$  is the population standard deviation. Any site with a z-score  $\leq -9$  or  $\geq 9$  was filtered  
355 out (**Supplementary Figure 5**).
- 356

357 In the end, a set of 25,653 high-quality variants were selected for further analyses.

358

359 *Variant association analyses.* Individual Fisher's exact tests of association to the phenotype were  
360 conducted for each variant site. No adjustments were made for multiple comparisons; as these  
361 regions were selected on the basis of a previously known association, a  $P < 0.001$  was  
362 considered to indicate an informative variant leading the association of an identifiable haplotype.  
363 In order to detect clusters of variants of interest, a stepwise logistic regression controlling for the  
364 most significantly-associated variant in each region was performed for those regions with more  
365 than one variant passing the significance threshold. For this cluster selection, the threshold of a  
366  $P$ -value considered an outcome of nonrandom association with the variants selected to  
367 condition the logistic regression model was set to 0.1. PLINK v1.90b3v ([www.cog-  
368 genomics.org/plink/1.9](http://www.cog-genomics.org/plink/1.9))<sup>37</sup> was used for these statistical analyses. The aligned read sequences  
369 of all variants passing the threshold of significance were manually inspected using Samtools<sup>43</sup>

370 view to detect potential mapping errors, resulting in 96 variants that passed these filters (these  
371 include the next most significant variant and any additional variants gaining significance at the  
372 predetermined threshold after applying logistic regressions). BCFtools<sup>43</sup> and VCFtools<sup>44</sup> were  
373 used to facilitate the data handling. In this study, we define a haplotype as all the variants within  
374 a region whose association to the phenotype depends on the most associated variant (referred  
375 to as the lead SNP).

376  
377 *Association of each of the variants identified above with melanoma risk phenotypes in a larger*  
378 *cohort.* To investigate their contribution to the known melanoma risk phenotypes, candidate  
379 variants were tested for their association with various pigmentation phenotypes: skin  
380 pigmentation, childhood sunburn occasions, hair colour: red against all others, hair colour:  
381 blond, light brown, dark brown, black, ease of skin tanning and combined pigmentation score  
382 (first principal component of a PCA of all of these), using the UK Biobank data as previously  
383 described<sup>4</sup> for hair color, and which involves treating traits with more than two values as being  
384 ordinal. In addition, the association of the candidate variants to telomere length was also  
385 assessed using GWAS data from a meta-analysis by the ENGAGE consortium<sup>45</sup>. The association  
386 of the candidate variants to naevus count was done using the naevus count data included in the  
387 latest melanoma meta-analysis paper<sup>4</sup>.

388  
389 *Genetic association with melanoma outcomes.* Candidate SNPs tagging the haplotypes  
390 significantly associated with melanoma risk were tested for association, in the same case-control  
391 cohort, with melanoma-specific survival (MSS), age, sex, tumour thickness, ulceration and  
392 mitotic rate. We found no association with any of these variables except for MSS. MSS  
393 information was available for 613 patients with a median follow up of 8 years<sup>46</sup>. Univariable Cox  
394 proportional hazards regression was applied and Kaplan-Meier survival curves were plotted in  
395 STATA v14 (StataCorp LLC, 2019) comparing two groups: carriers vs non-carriers of the risk  
396 allele.

397  
398 *Functional testing of variants in MTAP/CDKN2A and CASP8 via massively parallel reporter assays*  
399 *(MPRA).* Data generated previously as reported by Choi and colleagues<sup>47</sup> were paired to the  
400 candidate risk haplotypes for both regions. The overlapping matches associated or in linkage  
401 disequilibrium with the haplotypes here reported were assessed in their allelic transcriptional  
402 function with the MPRA approach. In brief, variants that are in LD ( $r^2 > 0.4$ ) with GWAS leads from  
403 the melanoma meta-analysis conducted by Law and colleagues<sup>5</sup> and secondary leads identified  
404 through fine-mapping were selected. The potential as an enhancer or promoter element was  
405 tested using a 145-bp genomic sequence encompassing each variant site and was investigated  
406 in luciferase constructs. Each allele of each variant, designed in both forward and reverse  
407 directions, was linked to 10 unique barcode sequences. The surrounding 20bp of each variant  
408 were scrambled to be tested as a null. The transcription of barcodes of each element transfected  
409 into a melanoma cell line (UACC903, to represent melanoma-specific *trans*-acting factors) as  
410 well as the cell line HEK293FT (to represent non-cell-type-specific activity in a highly  
411 transfectable cell line) was measured by sequencing. Variants with a significant difference  
412 between two alleles comparing the ratio of RNA TPM/DNA TPM (tags per million, e.g. normalized

413 tag count) are reported as those with allelic transcriptional activity (FDR<0.01; two-sided Wald  
414 test with robust sandwich type variance estimate; multiple comparisons adjusted using  
415 Benjamini & Hochberg method).

416 **Acknowledgments**

417 The wish to acknowledge Ian Dunham, Laurens Wilming, Jennifer H. Barrett, and John Taylor for  
418 help with the definition of samples to include and regions to sequence. The authors wish to thank  
419 Luis A. Aguilar, Alejandro de León and Carlos S. Flores from the Laboratorio Nacional de  
420 Visualización Científica Avanzada, and Jair S. García Sotelo, Abigayl Hernández, Eglee Lomelín,  
421 Alejandra Castillo and Carina Díaz from the International Laboratory for Human Genome  
422 Research, National Autonomous University of Mexico. This study makes use of data generated  
423 by the Wellcome Trust Case Control Consortium. A full list of the investigators who contributed  
424 to the generation of the data is available from [www.wtccc.org.uk](http://www.wtccc.org.uk).

425

426 **Funding**

427 This work was supported by Cancer Research UK [to D.J.A.], the Medical Research Council  
428 [MR/S01473X/1 to C.D.R.-E. and D.J.A] and Programa de Apoyo a Proyectos de Investigación  
429 e Innovación Tecnológica (PAPIIT UNAM) [IA202020 to C.D.R.-E.]. C.D.R.-E. is also supported  
430 by CONACyT [A3-S-31603 and A1-S-30165], the Melanoma Research Alliance [825924,  
431 <https://doi.org/10.48050/pc.gr.143729>], the Academy of Medical Sciences through a Newton  
432 Advanced Fellowship [NAF\R2\180782] and a Wellcome Sanger Institute International  
433 Fellowship. C.C.G. is a PhD student from Programa de Doctorado en Ciencias Biomédicas,  
434 Universidad Nacional Autónoma de México (UNAM), and is supported by CONACyT [holder no.  
435 330123, scholarship no. 385365]. This work represents a substantial part of her dissertation.  
436 Funding for the project was provided by the Wellcome Trust under award 076113.

437

438 **Data and code availability**

439 Sequence data for all cases and controls in this study have been deposited at the European  
440 Genome-phenome Archive and can be found under accession number EGAC00001000205. All  
441 code used in this study can be found in [https://github.com/citosina/melanoma\\_reseq](https://github.com/citosina/melanoma_reseq). MPRA  
442 data are available in the NCBI Gene Expression Omnibus as a SuperSeries under the accession  
443 number GSE129250.

- 444 1. Parkin, D. M., Mesher, D. & Sasieni, P. 13. Cancers attributable to solar (ultraviolet) radiation  
445 exposure in the UK in 2010. *Br. J. Cancer* **105**, S66–S69 (2011).
- 446 2. Harland, M. *et al.* Prevalence and predictors of germline CDKN2A mutations for melanoma  
447 cases from Australia, Spain and the United Kingdom. *Hered. Cancer Clin. Pract.* **12**, (2014).
- 448 3. Barrett, J. H. *et al.* Genome-wide association study identifies three new melanoma  
449 susceptibility loci. *Nat. Genet.* **43**, 1108–1113 (2011).
- 450 4. Landi, M. T. *et al.* Genome-wide association meta-analyses combining multiple risk  
451 phenotypes provide insights into the genetic architecture of cutaneous melanoma  
452 susceptibility. *Nat. Genet.* **52**, 494–504 (2020).
- 453 5. Law, M. H. *et al.* Genome-wide meta-analysis identifies five new susceptibility loci for  
454 cutaneous malignant melanoma. *Nat. Genet.* **47**, 987–995 (2015).
- 455 6. Cannon-Albright, L. *et al.* Assignment of a locus for familial melanoma, MLM, to chromosome  
456 9p13-p22. *Science* **258**, 1148 (1992).
- 457 7. Zuo, L. *et al.* Germline mutations in the p16INK4a binding domain of CDK4 in familial  
458 melanoma. *Nat. Genet.* **12**, 97–99 (1996).
- 459 8. Horn, S. *et al.* TERT promoter mutations in familial and sporadic melanoma. *Science* **339**,  
460 959–961 (2013).
- 461 9. Robles-Espinoza, C. D. *et al.* POT1 loss-of-function variants predispose to familial  
462 melanoma. *Nat. Genet.* **46**, 478–481 (2014).
- 463 10. Shi, J. *et al.* Rare missense variants in POT1 predispose to familial cutaneous malignant  
464 melanoma. *Nat. Genet.* **46**, 482–486 (2014).
- 465 11. Aoude, L. G., Wadt, K. A. W., Pritchard, A. L. & Hayward, N. K. Genetics of familial melanoma:  
466 20 years after *CDKN2A*. *Pigment Cell Melanoma Res.* **28**, 148–160 (2015).
- 467 12. Fletcher, O. & Houlston, R. S. Architecture of inherited susceptibility to common cancer. *Nat.*  
468 *Rev. Cancer* **10**, 353–361 (2010).
- 469 13. Brenner, M. & Hearing, V. J. The Protective Role of Melanin Against UV Damage in Human  
470 Skin. *Photochem. Photobiol.* **84**, 539–549 (2008).
- 471 14. Davies, J. R. *et al.* Inherited variants in the MC1R gene and survival from cutaneous  
472 melanoma: a BioGenoMEL study. *Pigment Cell Melanoma Res.* **25**, 384–394 (2012).
- 473 15. Duffy, D. L. *et al.* Multiple Pigmentation Gene Polymorphisms Account for a Substantial  
474 Proportion of Risk of Cutaneous Malignant Melanoma. *J. Invest. Dermatol.* **130**, 520–528  
475 (2010).
- 476 16. Adzhubei, I., Jordan, D. M. & Sunyaev, S. R. Predicting functional effect of human missense  
477 mutations using PolyPhen-2. *Curr. Protoc. Hum. Genet.* **Chapter 7**, Unit7.20 (2013).
- 478 17. Ng, P. C. & Henikoff, S. SIFT: Predicting amino acid changes that affect protein function.  
479 *Nucleic Acids Res.* **31**, 3812–3814 (2003).
- 480 18. Lin, Y. *et al.* Association between genetic variation within vitamin D receptor-DNA binding  
481 sites and risk of basal cell carcinoma. *Int. J. Cancer* **140**, 2085–2091 (2017).
- 482 19. Ramagopalan, S. V. *et al.* A ChIP-seq defined genome-wide map of vitamin D receptor  
483 binding: Associations with disease and evolution. *Genome Res.* **20**, 1352–1360 (2010).
- 484 20. Liu, S. *et al.* Discovery of CASP8 as a potential biomarker for high-risk prostate cancer  
485 through a high-multiplex immunoassay. *Sci. Rep.* **11**, 7612 (2021).

- 486 21. Zhang, T. *et al.* Cell-type-specific eQTL of primary melanocytes facilitates identification of  
487 melanoma susceptibility genes. *Genome Res.* **28**, 1621–1635 (2018).
- 488 22. Carithers, L. J. *et al.* A Novel Approach to High-Quality Postmortem Tissue Procurement:  
489 The GTEx Project. *Biopreservation Biobanking* **13**, 311–319 (2015).
- 490 23. Del Castillo Velasco-Herrera, M. *et al.* Comparative genomics reveals that loss of lunatic  
491 fringe (LFNG) promotes melanoma metastasis. *Mol. Oncol.* **12**, 239–255 (2018).
- 492 24. Stansel, T., Wickline, S. A. & Pan, H. NF- $\kappa$ B Inhibition Suppresses Experimental Melanoma  
493 Lung Metastasis. *J. Cancer Sci. Clin. Ther.* **4**, 256–265 (2020).
- 494 25. Ueda, Y. & Richmond, A. NF- $\kappa$ B activation in melanoma. *Pigment Cell Res. Spons. Eur. Soc.*  
495 *Pigment Cell Res. Int. Pigment Cell Soc.* **19**, 112–124 (2006).
- 496 26. O’Shea, S. J., Davies, J. R. & Newton-Bishop, J. A. Vitamin D, vitamin A, the primary  
497 melanoma transcriptome and survival. *Br. J. Dermatol.* **175 Suppl 2**, 30–34 (2016).
- 498 27. Robles-Espinoza, C. D. *et al.* Germline MC1R status influences somatic mutation burden in  
499 melanoma. *Nat. Commun.* **7**, 12064 (2016).
- 500 28. Randerson-Moor, J. A. *et al.* Vitamin D receptor gene polymorphisms, serum 25-  
501 hydroxyvitamin D levels, and melanoma: UK case-control comparisons and a meta-analysis  
502 of published VDR data. *Eur. J. Cancer* **45**, 3271–3281 (2009).
- 503 29. Burton, P. R. *et al.* Genome-wide association study of 14,000 cases of seven common  
504 diseases and 3,000 shared controls. *Nature* **447**, 661–678 (2007).
- 505 30. Yates, A. D. *et al.* Ensembl 2020. *Nucleic Acids Res.* **48**, D682–D688 (2020).
- 506 31. Davis, C. A. *et al.* The Encyclopedia of DNA elements (ENCODE): data portal update. *Nucleic*  
507 *Acids Res.* **46**, D794–D801 (2018).
- 508 32. Newton-Bishop, J. A. *et al.* Melanocytic Nevi, Nevus Genes, and Melanoma Risk in a Large  
509 Case-Control Study in the United Kingdom. *Cancer Epidemiol. Prev. Biomark.* **19**, 2043–  
510 2054 (2010).
- 511 33. Li, H. & Durbin, R. Fast and accurate short read alignment with Burrows-Wheeler transform.  
512 *Bioinforma. Oxf. Engl.* **25**, 1754–1760 (2009).
- 513 34. Tischler, G. & Leonard, S. biobambam: tools for read pair collation based algorithms on BAM  
514 files. *Source Code Biol. Med.* **9**, 13 (2014).
- 515 35. Li, H. A statistical framework for SNP calling, mutation discovery, association mapping and  
516 population genetical parameter estimation from sequencing data. *Bioinformatics* **27**, 2987–  
517 2993 (2011).
- 518 36. Wigginton, J. E., Cutler, D. J. & Abecasis, G. R. A Note on Exact Tests of Hardy-Weinberg  
519 Equilibrium. *Am. J. Hum. Genet.* **76**, 887–893 (2005).
- 520 37. Chang, C. C. *et al.* Second-generation PLINK: rising to the challenge of larger and richer  
521 datasets. *GigaScience* **4**, 7 (2015).
- 522 38. Carson, A. R. *et al.* Effective filtering strategies to improve data quality from population-  
523 based whole exome sequencing studies. *BMC Bioinformatics* **15**, 125 (2014).
- 524 39. Li, H. Towards Better Understanding of Artifacts in Variant Calling from High-Coverage  
525 Samples. *Bioinformatics* **30**, 2843–2851 (2014).
- 526 40. McKenna, A. *et al.* The Genome Analysis Toolkit: A MapReduce framework for analyzing  
527 next-generation DNA sequencing data. *Genome Res.* **20**, 1297–1303 (2010).

- 528 41. DePristo, M. A. *et al.* A framework for variation discovery and genotyping using next-  
529 generation DNA sequencing data. *Nat. Genet.* **43**, 491–498 (2011).
- 530 42. Karczewski, K. J. *et al.* The mutational constraint spectrum quantified from variation in  
531 141,456 humans. *Nature* **581**, 434–443 (2020).
- 532 43. Danecek, P. *et al.* Twelve years of SAMtools and BCFtools. *GigaScience* **10**, (2021).
- 533 44. Danecek, P. *et al.* The variant call format and VCFtools. *Bioinformatics* **27**, 2156–2158 (2011).
- 534 45. Li, C. *et al.* Genome-wide Association Analysis in Humans Links Nucleotide Metabolism to  
535 Leukocyte Telomere Length. *Am. J. Hum. Genet.* **106**, 389–404 (2020).
- 536 46. Thakur, R. *et al.* Transcriptomic Analysis Reveals Prognostic Molecular Signatures of Stage  
537 I Melanoma. *Clin. Cancer Res.* **25**, 7424–7435 (2019).
- 538 47. Choi, J. *et al.* Massively parallel reporter assays of melanoma risk variants identify MX2 as a  
539 gene promoting melanoma. *Nat. Commun.* **11**, 2718 (2020).
- 540 48. Boyle, A. P. *et al.* Annotation of functional variation in personal genomes using RegulomeDB.  
541 *Genome Res.* **22**, 1790–1797 (2012).
- 542 49. The International HapMap Consortium. The International HapMap Project. *Nature* **426**, 789–  
543 796 (2003).
- 544 50. Machiela, M. J. & Chanock, S. J. LDassoc: an online tool for interactively exploring genome-  
545 wide association study results and prioritizing variants for functional investigation.  
546 *Bioinforma. Oxf. Engl.* **34**, 887–889 (2018).
- 547
- 548
- 549

## 550 **Figure Legends**

551

552 **Figure 1. Genomic regions with variants associated with melanoma.** Seven genomic  
553 association graphs, one per locus, are shown. The X axis shows the genomic location and the Y  
554 axis displays the degree of association ( $\log_{10}(P\text{-value})$ ). The horizontal gray line depicts the  
555 significance threshold ( $P = 0.001$ ). Circle colours represent the allelic frequency of the alternate  
556 allele.

557

558 **Figure 2. Association of variants in the *MC1R* region with melanoma, melanoma-linked  
559 phenotypes and survival. a)** The top panel depicts the  $-\log_{10}(P\text{ value})$  of association with  
560 melanoma of variants significantly associated ( $P\text{ value} < 1 \times 10^{-7}$ ) from the most recent melanoma  
561 meta-analysis<sup>4</sup>. Numbers inside the circles display the RegulomeDB<sup>48</sup> rank, the circle size  
562 represents the minor allele frequency. The variant in purple is the most associated in the meta-  
563 analysis (rs1805007), the red shade depicts the linkage disequilibrium ( $r^2$ ) value with respect to  
564 it. The horizontal blue line indicates  $P = 5 \times 10^{-8}$ . The overlay Y axis depicts the combined  
565 recombination rate from HapMap<sup>49</sup>. The middle panel depicts the genes in the genomic region.  
566 These panels were interactively plotted by LD-assoc (<https://ldlink.nci.nih.gov/>)<sup>50</sup>. The lower  
567 panel shows the results of the association tests and the logistic regressions in the melanoma  
568 case-control cohort in this study. The colour of the circle represents the linkage disequilibrium  
569 ( $r^2$ ) value with respect to the most associated variant, and the circle size represents the allelic  
570 frequency of the minor allele. **b)** P-value of association tests of all melanoma-associated variants  
571 with distinct melanoma-linked phenotypes. r1, r2 and r3 represent distinct haplotypes, P-values  
572 were truncated at  $\log_{10}(-\log_{10} > 2.488)$ . **c)** Survival fraction of patients in this melanoma case-  
573 control cohort grouped by carrier status of rs1805009.

574

575 **Figure 3. Association of variants in the *TYR* region with melanoma and melanoma-linked  
576 phenotypes. a)** The top panel depicts, in the Y axis, the  $-\log_{10}(P\text{ value})$  of association with  
577 melanoma of variants significantly associated ( $P\text{ value} < 1 \times 10^{-7}$ ) from the most recent melanoma  
578 meta-analysis<sup>4</sup> as well as the combined recombination rate from HapMap<sup>49</sup>. Numbers inside the  
579 circles hold regulatory information (if any) from RegulomeDB<sup>48</sup>, the circle size represents the  
580 minor allele frequency. The variant in purple is the most associated in the meta-analysis  
581 (rs1126809), the red shade depicts the linkage disequilibrium ( $r^2$ ) value with respect to it. The  
582 horizontal blue line indicates  $P = 5 \times 10^{-8}$ . The genes in the genomic region are depicted in the  
583 middle panel. These panels were interactively plotted by LDassoc (<https://ldlink.nci.nih.gov/>)<sup>50</sup>.  
584 The results of the association tests and logistic regressions in the melanoma case-control cohort  
585 in this study are shown in the lower panel. The colour of the circle represents the linkage  
586 disequilibrium ( $r^2$ ) value with respect to the most associated variant, and the circle size represents  
587 the allelic frequency of the minor allele. **b)** P-value of association tests of all melanoma-  
588 associated variants with distinct melanoma-linked phenotypes. r1 and r2 represent distinct  
589 haplotypes, P-values were truncated at  $\log_{10}(-\log_{10} > 2.488)$ .

590



591 **Figure 4. Association of variants in the *MTAP/CDKN2A* region with melanoma melanoma-**  
592 **linked phenotypes and survival. a)** The top panel shows the combined recombination rate from  
593 HapMap and the  $-\log_{10}(P\text{-value})$  of association with melanoma of variants significantly associated  
594 ( $P$  value  $1 \times 10^{-7}$ ) from the most recent melanoma meta-analysis<sup>4</sup> as well as the combined  
595 recombination rate from HapMap<sup>49</sup>. Numbers inside the circles hold regulatory information (if  
596 any) from RegulomeDB<sup>48</sup>, the circle size represents the minor allele frequency. The purple dot is  
597 the most associated in the meta-analysis (rs871024), the red shade depicts the linkage  
598 disequilibrium ( $r^2$ ) value with respect to it. The horizontal blue line indicates  $P=5 \times 10^{-8}$ . The genes  
599 in the genomic region are depicted in the middle panel. These panels were interactively plotted  
600 by LDassoc (<https://ldlink.nci.nih.gov/>)<sup>50</sup>. The results of the association tests and logistic  
601 regressions in the melanoma cohort in this study are shown in the lower panel. The colour of the  
602 circle represents the linkage disequilibrium ( $r^2$ ) value with respect to the most associated variant,  
603 and the circle size represents the allelic frequency of the minor allele. **b)**  $P$ -value of association  
604 tests of all melanoma-associated variants with distinct melanoma-linked phenotypes. r1 and r2  
605 represent distinct haplotypes. **c)** Survival fraction of patients in the melanoma cohort in this study  
606 grouped by carrier status of rs2518722.

607  
608 **Figure 5. Association of variants in the *CASP8* region with melanoma melanoma-linked**  
609 **phenotypes and survival. a)** The top panel shows the combined recombination rate from  
610 HapMap and the  $-\log_{10}(P\text{ value})$  of association with melanoma of variants significantly associated  
611 ( $P$  value  $1 \times 10^{-7}$ ) from the most recent melanoma meta-analysis<sup>4</sup> as well as the combined  
612 recombination rate from HapMap<sup>49</sup>. Numbers inside the circles hold regulatory information (if  
613 any) from RegulomeDB<sup>48</sup>, the circle size represents the minor allele frequency. The purple dot  
614 corresponds to rs3769823, the red shade depicts the linkage disequilibrium ( $r^2$ ) value with  
615 respect to it. The horizontal blue line indicates  $P=5 \times 10^{-8}$ . The genes in the genomic region are  
616 depicted in the middle panel. These panels were interactively plotted by LDassoc  
617 (<https://ldlink.nci.nih.gov/>)<sup>50</sup>. The results of the association tests and logistic regressions in the  
618 melanoma cohort in this study are shown in the lower panel. The colour of the circle represents  
619 the linkage disequilibrium ( $r^2$ ) value with respect to the most associated variant, and the circle  
620 size represents the allelic frequency of the minor allele. **b)**  $P$ -value of association tests of all  
621 melanoma-associated variants with distinct melanoma-linked phenotypes. r1 and r2 represent  
622 distinct haplotypes. **c)** Survival fraction of patients in the melanoma cohort in this study grouped  
623 by carrier status of rs3769818.

624  
625

626 **Table legends**

627

628 **Table 1. Loci included in this study.** The location (GRCh38), genes of interest and the targeted  
629 regions associated to each locus are indicated.

630

631

## 632 **Supplementary Figure Legends**

633

634 **Supplementary Figure 1. Association of variants in the *OCA2* region with melanoma**  
635 **melanoma-linked phenotypes. a)** Regional association  $P$ -values for identified melanoma  
636 susceptibility variants significantly associated ( $P$ -value  $1 \times 10^{-7}$ ) from the most recent melanoma  
637 meta-analysis<sup>4</sup> is depicted in the top panel as well as the combined recombination rate from  
638 HapMap in the shared Y axis. The numbers contained in the circles represent RegulomeDB<sup>48</sup>  
639 (Boyle et al., 2012) regulatory classification, and the circle size reflects minor allele frequency.  
640 The purple circle corresponds to rs129123832, the top SNP in the region reported in the latest  
641 meta-analysis (Landi et al., 2020). The red shade depicts the linkage disequilibrium ( $r^2$ ) value with  
642 respect to it. The horizontal blue line indicates  $P=5 \times 10^{-8}$ . The genes in the genomic region are  
643 depicted in the middle panel. These panels were interactively plotted by LDassoc  
644 (<https://ldlink.nci.nih.gov/>)<sup>50</sup>. The results of the association tests and logistic regressions in the  
645 melanoma cohort in this study are shown in the lower panel. The colour of the circle represents  
646 the linkage disequilibrium ( $r^2$ ) value with respect to the most associated variant, and the circle  
647 size represents the allelic frequency of the minor allele. **b)**  $P$ -value of association tests of all  
648 melanoma-associated variants with distinct melanoma-linked phenotypes.  $r_1$  and  $r_2$  represent  
649 distinct haplotypes,  $P$ -values were truncated at  $\log_{10}(-\log_{10} > 2.488)$ .

650

651 **Supplementary Figure 2. Association of variants in the *CDH1* region with melanoma**  
652 **melanoma-linked phenotypes and survival. a)** Regional association  $P$ -values for identified  
653 melanoma susceptibility variants significantly associated ( $P$ -value  $1 \times 10^{-7}$ ) from the most recent  
654 melanoma meta-analysis<sup>4</sup> is depicted in the top panel as well as the combined recombination  
655 rate from HapMap in the shared Y axis. The numbers contained in the circles represent  
656 RegulomeDB<sup>48</sup> regulatory classification, and the circle size reflects minor allele frequency. The  
657 purple circle corresponds to rs4420522, the top SNP in the region reported in the latest meta-  
658 analysis. The red shade depicts the linkage disequilibrium ( $r^2$ ) value with respect to it. The  
659 horizontal blue line indicates  $P=5 \times 10^{-8}$ . The genes in the genomic region are depicted in the  
660 middle panel. These panels were interactively plotted by LDassoc (<https://ldlink.nci.nih.gov/>)<sup>50</sup>.  
661 The results of the association tests and logistic regressions in the melanoma cohort in this study  
662 are shown in the lower panel. The colour of the circle represents the linkage disequilibrium ( $r^2$ )  
663 value with respect to the most associated variant, and the circle size represents the allelic  
664 frequency of the minor allele. **b)**  $P$ -value of association tests of all melanoma-associated variants  
665 with distinct melanoma-linked phenotypes.  $r_1$  and  $r_2$  represent distinct haplotypes. **c)** Survival  
666 fraction of patients in the Leeds Melanoma cohort grouped by carrier status of rs35789195.

667

668 **Supplementary Figure 3. Association of variants in the *CCND1* region with melanoma**  
669 **melanoma-linked phenotypes. a)** Regional association  $P$ -values for identified melanoma  
670 susceptibility variants significantly associated ( $P$ -value  $1 \times 10^{-7}$ ) from the most recent melanoma  
671 meta-analysis<sup>4</sup> is depicted in the top panel as well as the combined recombination rate from  
672 HapMap in the shared Y axis. The numbers contained in the circles represent RegulomeDB<sup>48</sup>  
673 regulatory classification, and the circle size reflects minor allele frequency. The purple circle

674 corresponds to rs4354713, the red shade depicts the linkage disequilibrium ( $r^2$ ) value with  
675 respect to it. The horizontal blue line indicates  $P=5\times 10^{-8}$ . The genes in the genomic region are  
676 depicted in the middle panel. These panels were interactively plotted by LDassoc  
677 (<https://ldlink.nci.nih.gov/>)<sup>50</sup>. The results of the association tests and logistic regressions in the  
678 melanoma cohort in this study are shown in the lower panel. The colour of the circle represents  
679 the linkage disequilibrium ( $r^2$ ) value with respect to the most associated variant, and the circle  
680 size represents the allelic frequency of the minor allele. **b)**  $P$ -value of association tests of all  
681 melanoma-associated variants with distinct melanoma-linked phenotypes. r1 and r2 represent  
682 distinct haplotypes.

683  
684 **Supplementary Figure 4. Tranche plots for Variant Quality Score Recalibration (VQSR).** The  
685 threshold selected for this study was 99.4.

686  
687 **Supplementary Figure 5. Comparison of allelic frequencies of variants identified in this**  
688 **study and variants annotated in GnomAD.** Variants that passed this filter are depicted. The  
689 allelic frequency in this study is depicted in the X axis whereas that one in GnomAD can be found  
690 in the Y axis.

691  
692

693 **Supplementary Table Legends**

694

695 **Supplementary Table 1. List of variants significantly associated with melanoma in this**  
696 **study.** The column 'INFO' includes information about the variant consequences, including gene  
697 symbol and Ensembl transcript ID (Ensembl release 99)<sup>30</sup>. The 'P-value' column has the Fisher's  
698 test association value, 'P value 1st' and 'P value 2nd' refer to the P-values after the first and  
699 second logistic regressions respectively, controlling for the most associated variant. AF: Allele  
700 frequency, OR: Odds ratio. The 'rx' nomenclature in the 'Region' column refers to variants in the  
701 same haplotype ('r1' is the highest associated haplotype, 'r2' the second highest, etc).

702

703 **Supplementary Table 2. Association between associated SNPs and melanoma-linked**  
704 **traits.** 'REF' refers to the reference allele, 'ALT' is the alternative allele. OR: Odds ratio, SE:  
705 Standard error, P\_P-value, BETA: Beta coefficient from linear regression. Sunburn: sunburn  
706 occasions during childhood, Skin: skin pigmentation, tanning: Ease of tanning, pigscore:  
707 pigmentation score from PCA, TEL: Telomere length, NAEV: naevus count.

708

709 **Supplementary Table 3. MPRA results for selected variants in the *MTAP/CDKN2A* and**  
710 ***CASP8* regions.** 'Function' refers to the inferred function of a SNP, activator means that the  
711 alternative allele is significantly associated to higher mRNA expression of the target gene.  
712 'UACC903/HEK293' refers to analyses considering both cells together, 'UACC903 Only' refers  
713 to these cells considered alone. FDR: False discovery rate.

714

715 **Supplementary Table 4. Coding variants in *CDKN2A* found in this study.** Different lines per  
716 variant are shown if more than one transcript is affected by the variant.

717

718 **Supplementary Table 5. Transcription start sites annotated for each gene of interest.**  
719 Coordinates are in GRCh37, as this annotation was done with Ensembl release 69.

720

721 **Supplementary Table 6. Coordinates (GRCh37) of DNase I Hypersensitivity sites captured**  
722 **per targeted gene.**

723

724 **Supplementary Table 7. Design parameters for the capture probes used in this study.** This  
725 table includes all relevant parameters as reported by Agilent Technologies. The coordinates for  
726 all targeted regions can be found after the design, target and probe summary information.

727 **Supplementary note**

728

729 Variants associated with melanoma were also found in these regions:

730

731 *Oculocutaneous Albinism 2 (OCA2) region*. For this region, we sequenced exons and promoters  
732 of the genes *OCA2* and *HERC2*, both of which have been previously associated with melanoma  
733 development. The initial individual association tests identified three SNPs associated with  
734 melanoma (**Supplementary Figure 1a, Supplementary Table 1**), all in one haplotype with lead  
735 SNP rs12593929, falling on an intron in *HERC2*. The most significant SNP after the first logistic  
736 regression, in a separate haplotype, was chr15:28168711 AAG/A, a small deletion not found in  
737 dbSNP, and that had an initial association *P* value < 0.03. The three SNPs in the first haplotype  
738 were associated with a range of pigmentation traits (**Supplementary Figure 1b**), as expected,  
739 whereas the SNP leading the second haplotype could not be imputed in the UKBioBank data  
740 and therefore association scores could not be calculated. However, no association was found  
741 between this SNP and the one described as the lead SNP in Landi *et al*<sup>4</sup> (rs12913832). No SNPs  
742 in this region were found associated with MSS.

743

744 *E-cadherin (CDH1) region*. We sequenced the promoters and exons of two genes of interest  
745 (*CDH1* and *CDH3*) (**Table 1**). The initial association tests identified an intronic variant within  
746 *CDH1*, rs181642569, as associated with melanoma risk (**Supplementary Figure 2a,**  
747 **Supplementary Table 1**). The second most associated SNP after logistic regression was  
748 rs35789195, but no melanoma-linked phenotypes were found associated with these  
749 (**Supplementary Figure 2b**). For rs35789195, carriers of the alternative allele A were found to  
750 have a survival advantage over non-carriers (**Supplementary Figure 2c**). However, both SNPs  
751 seem unlinked to the lead SNP from the meta-analysis identified by Landi *et al* 2020<sup>4</sup> (rs4420522).

752

753 *Cyclin D1 (CCND1) region*. We sequenced exons, promoters and DHSs for four genes of interest:  
754 *CCND1*, *MYEOV*, *ORAOV1* and *FGF19* (**Table 1**). The initial Fisher's association tests identified  
755 a downstream SNP from *FGF19*, rs17136816, as associated with melanoma with *P*-value =  
756 0.0006689 and OR of the reference allele of 1.844 (**Supplementary Table 1, Supplementary**  
757 **Figure 3a**). However, it is not associated with the lead SNP identified in Landi *et al* in this region  
758 (rs4354713). The next most significant SNP was rs77925438, also not correlated with rs4354713.  
759 No melanoma-linked traits were found associated with any of these two SNPs (**Supplementary**  
760 **Figure 3b**).

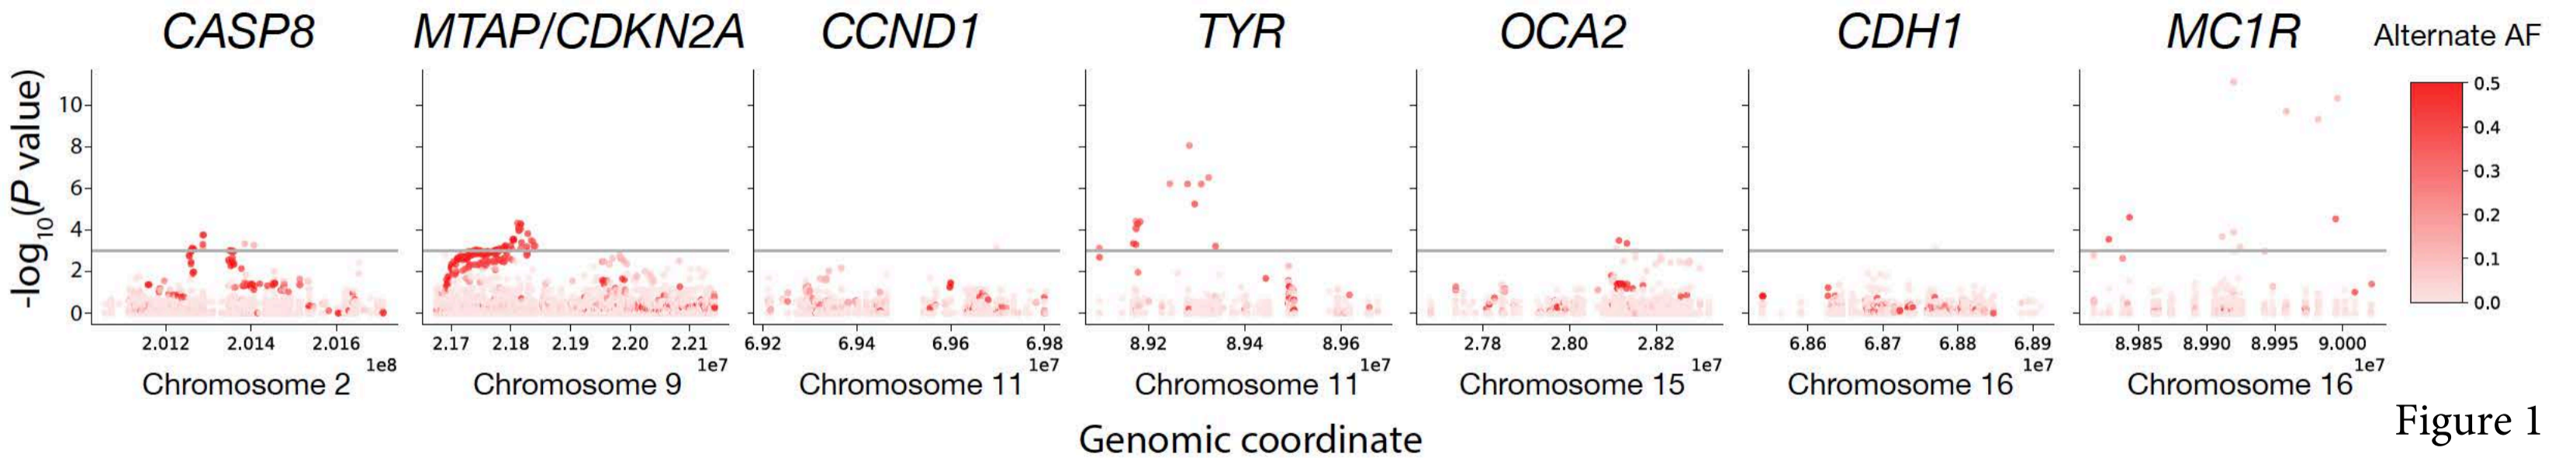

Figure 1

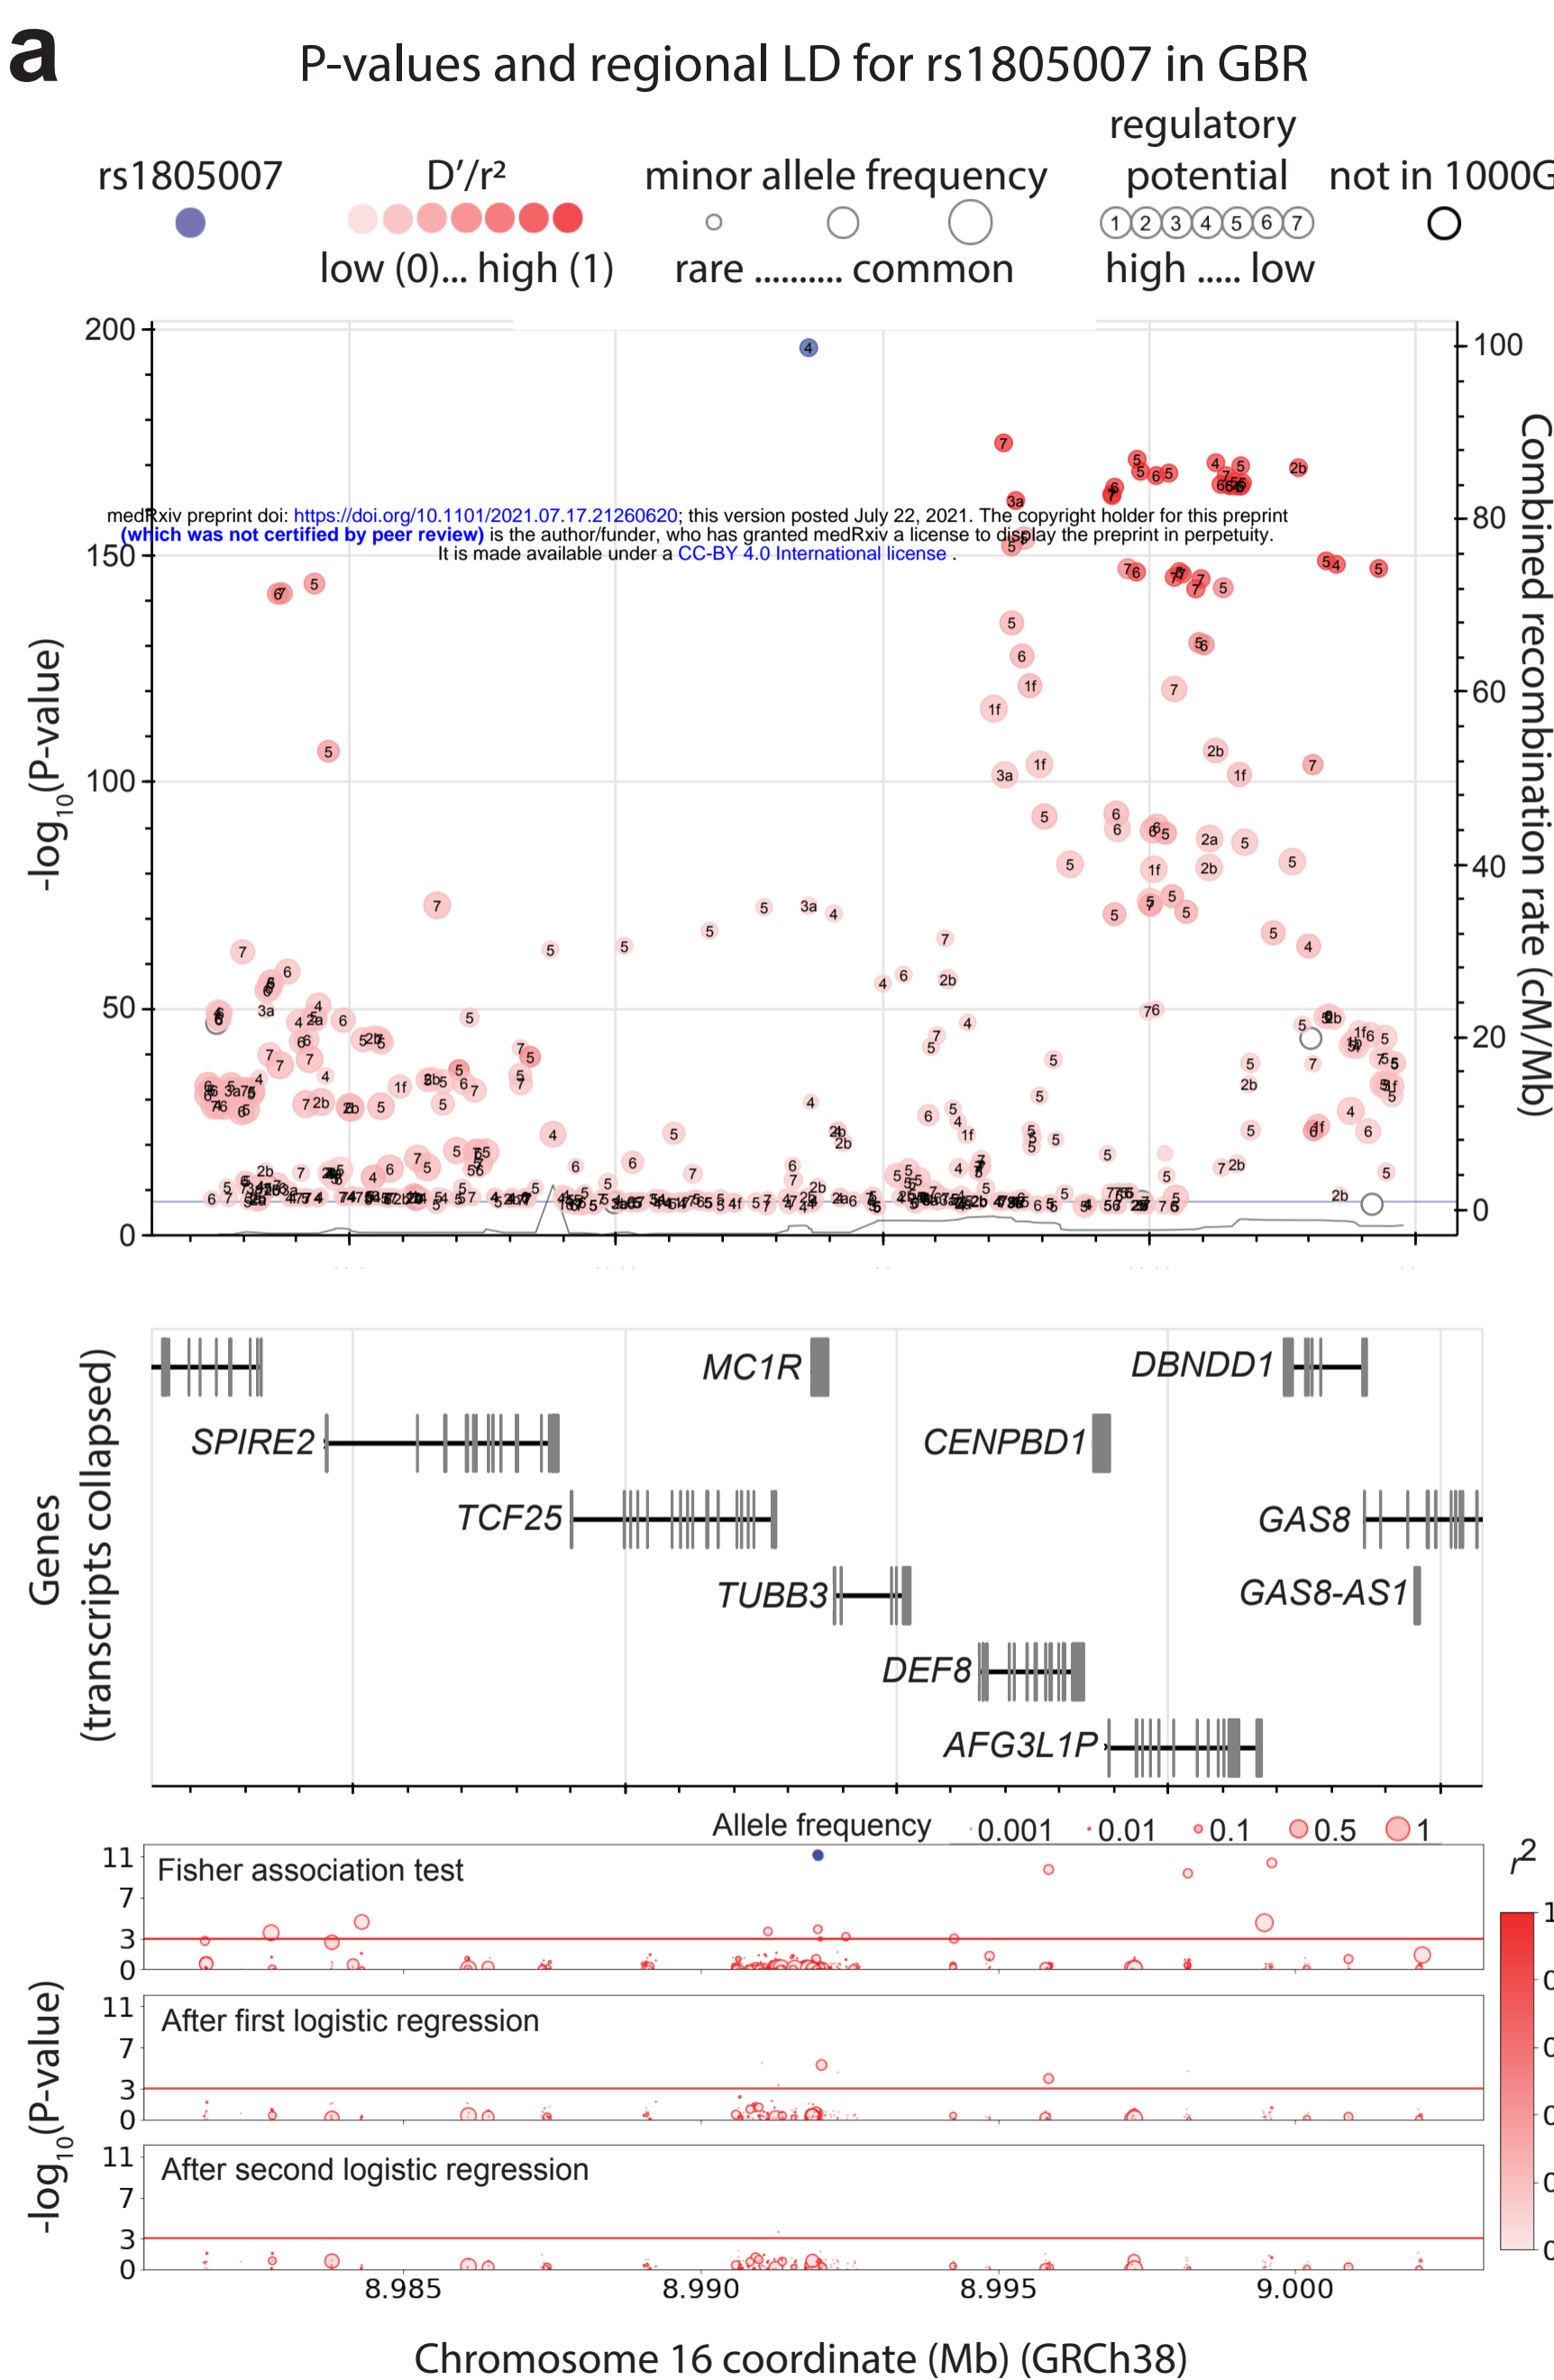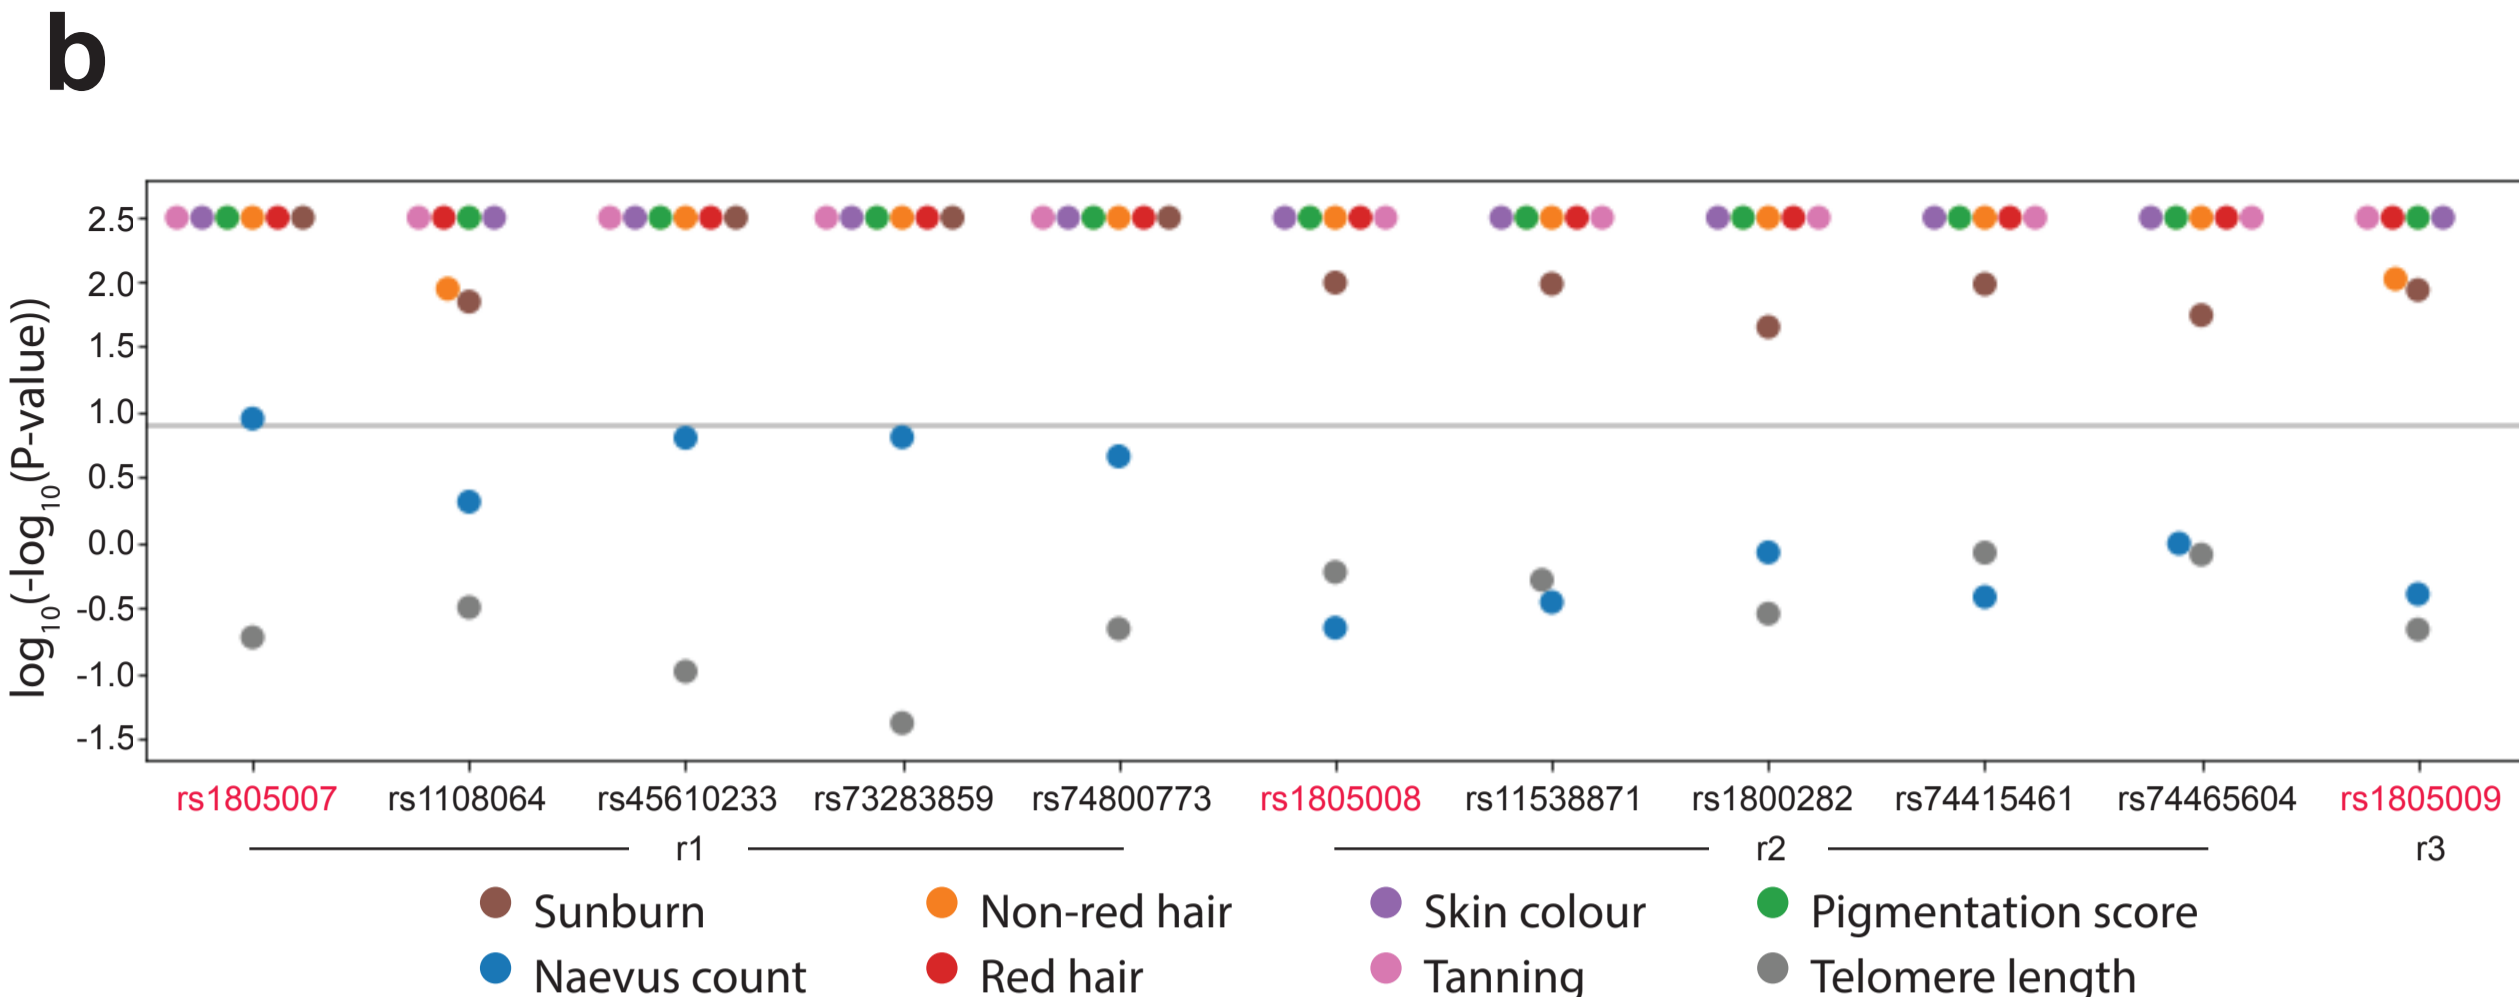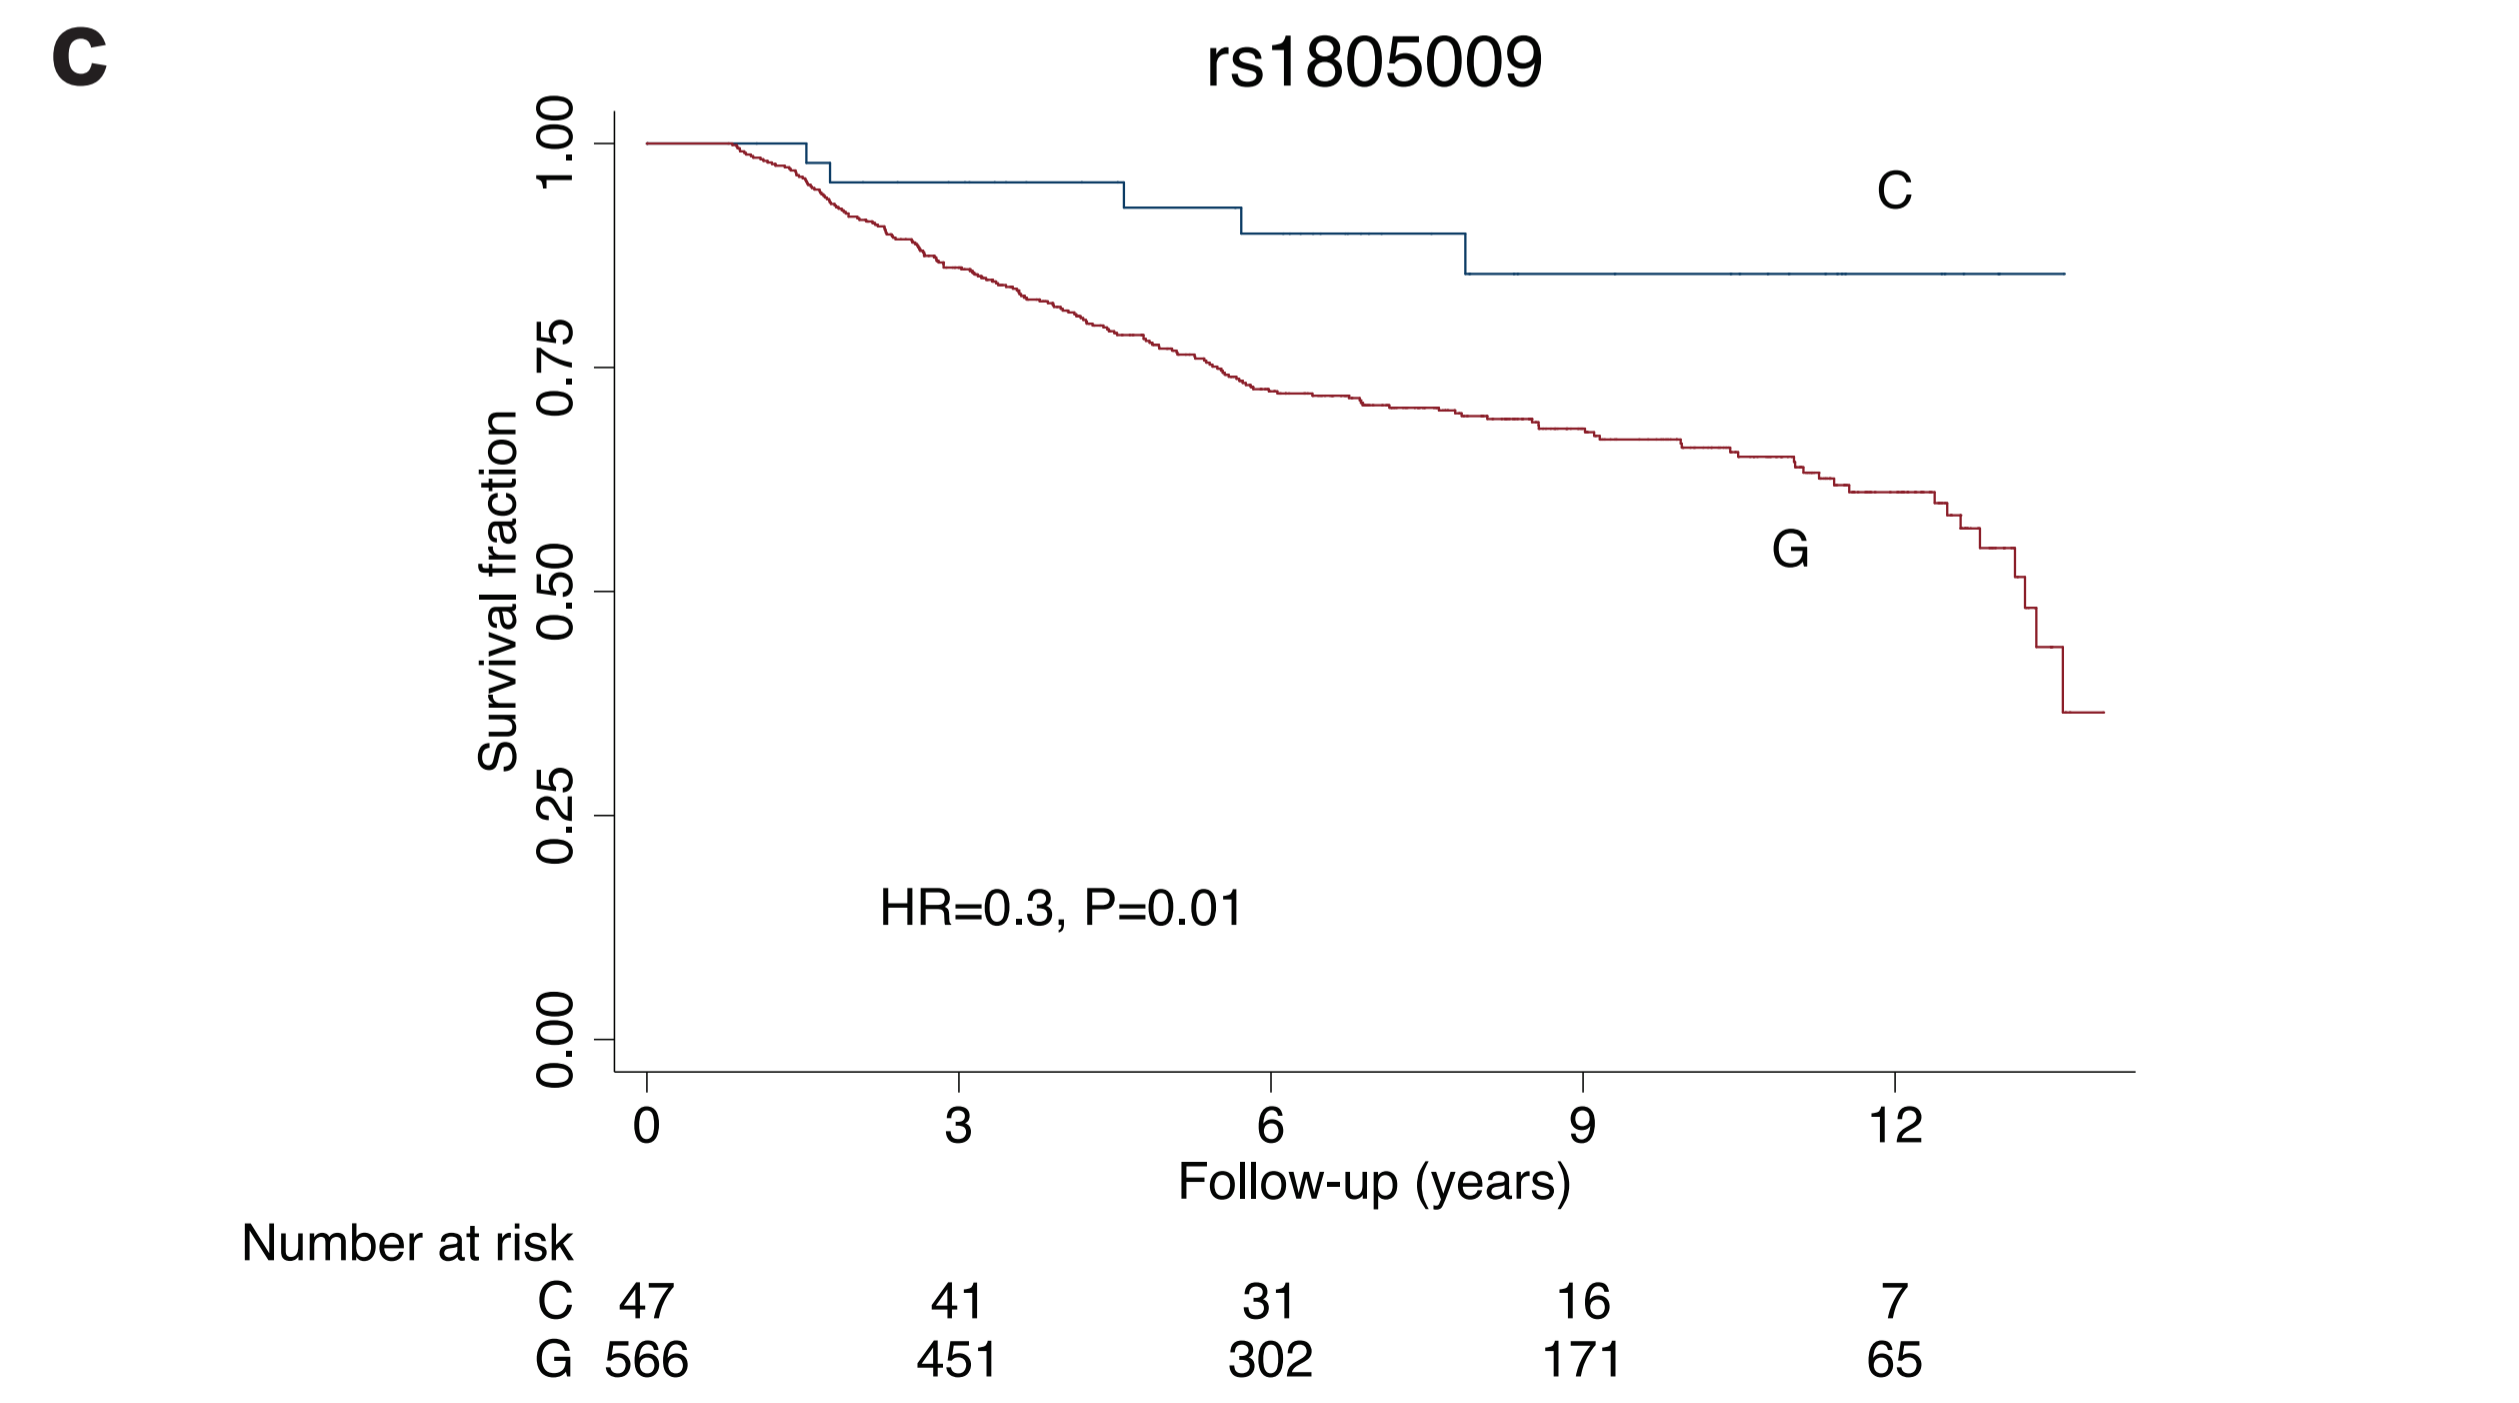

Figure 2



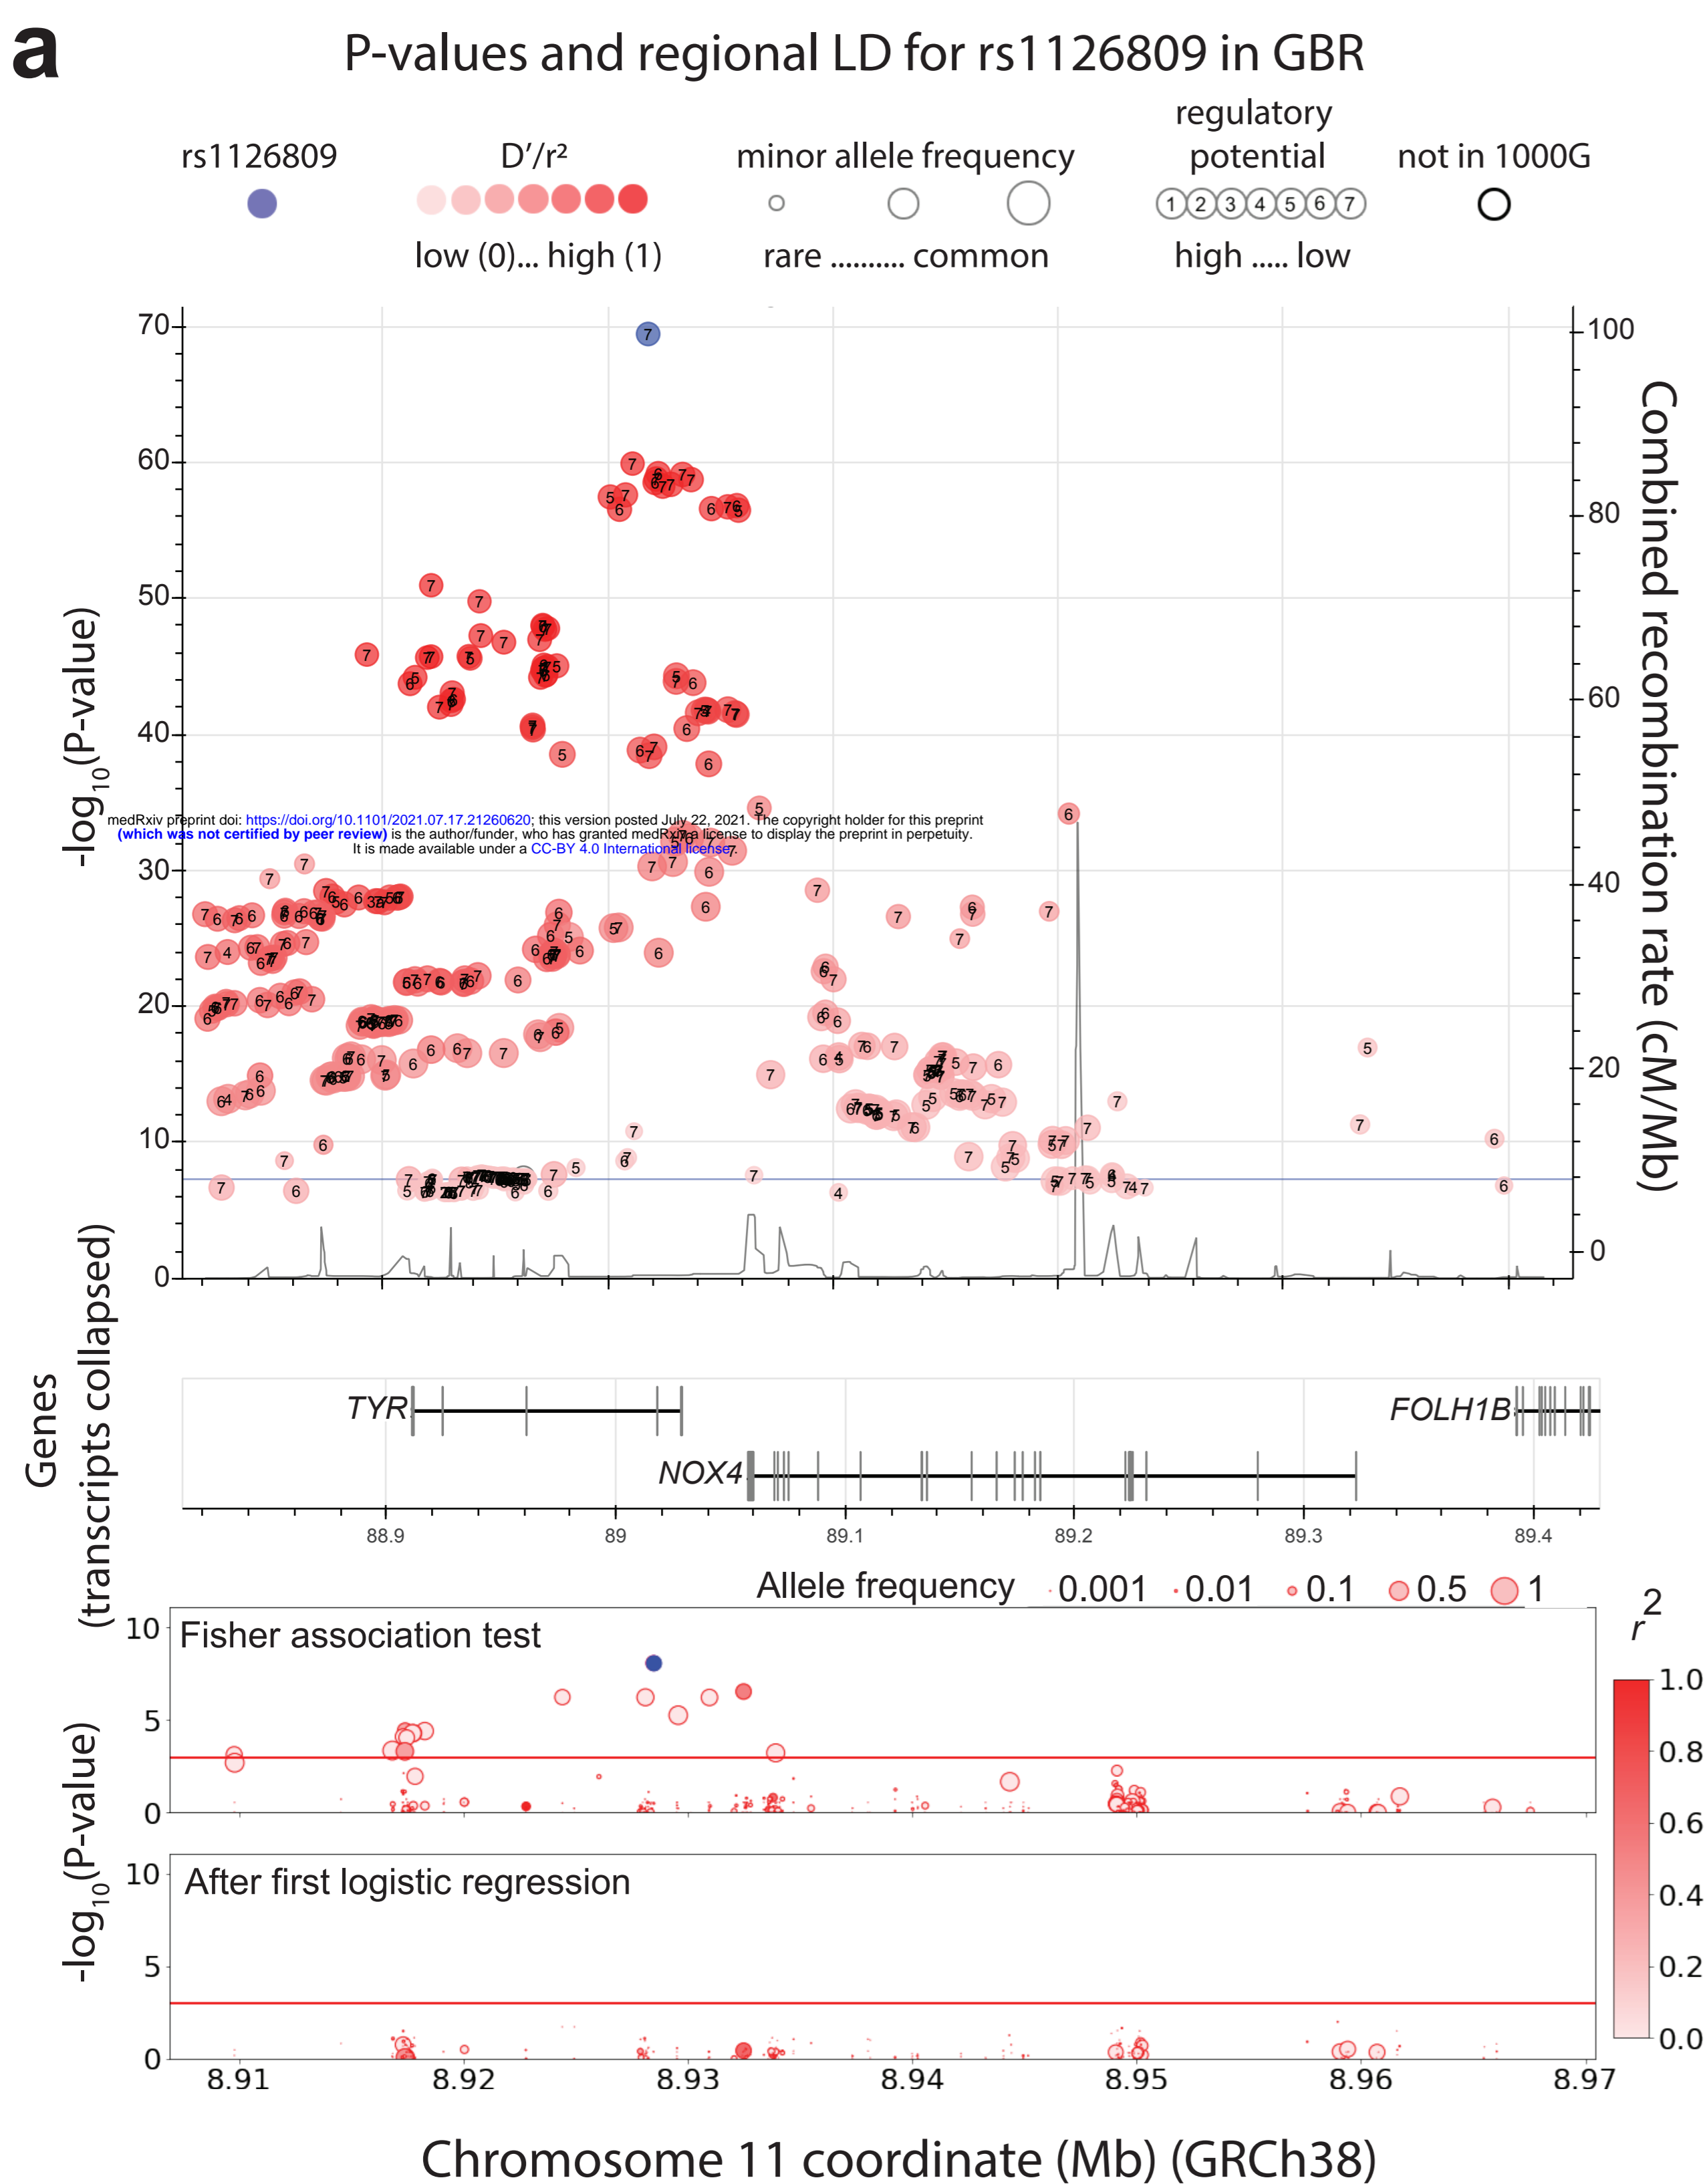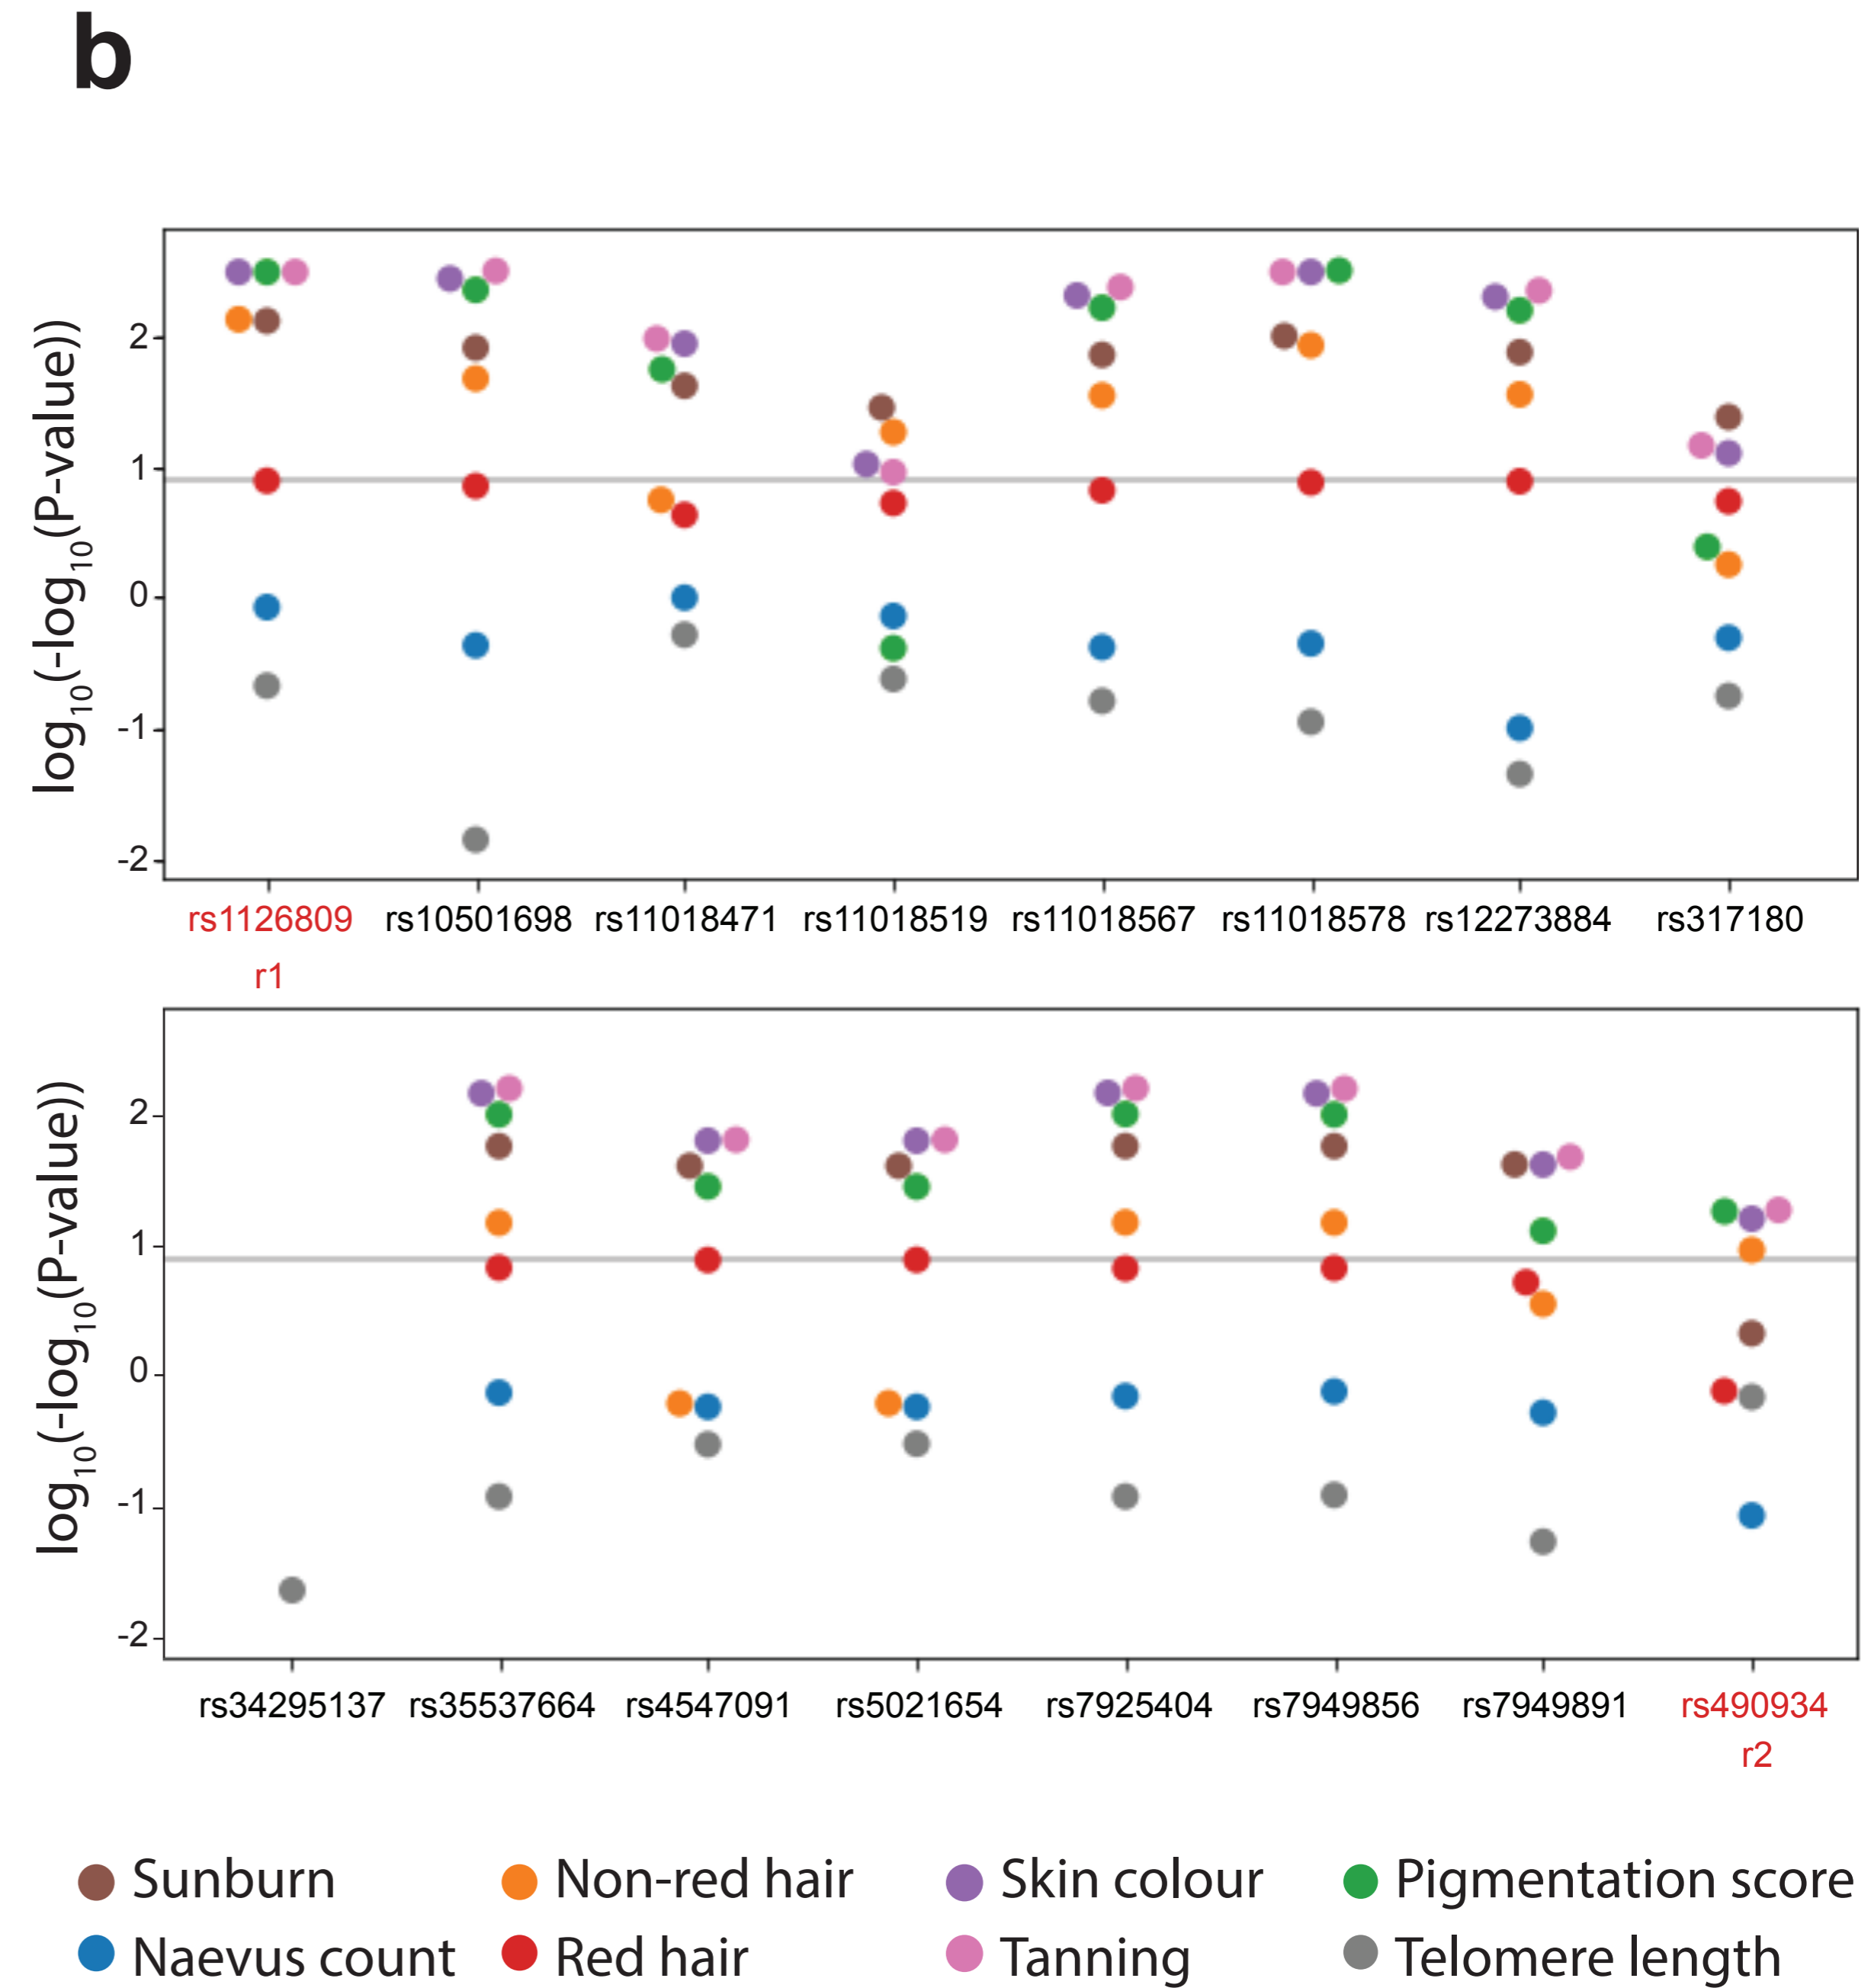

Figure 3

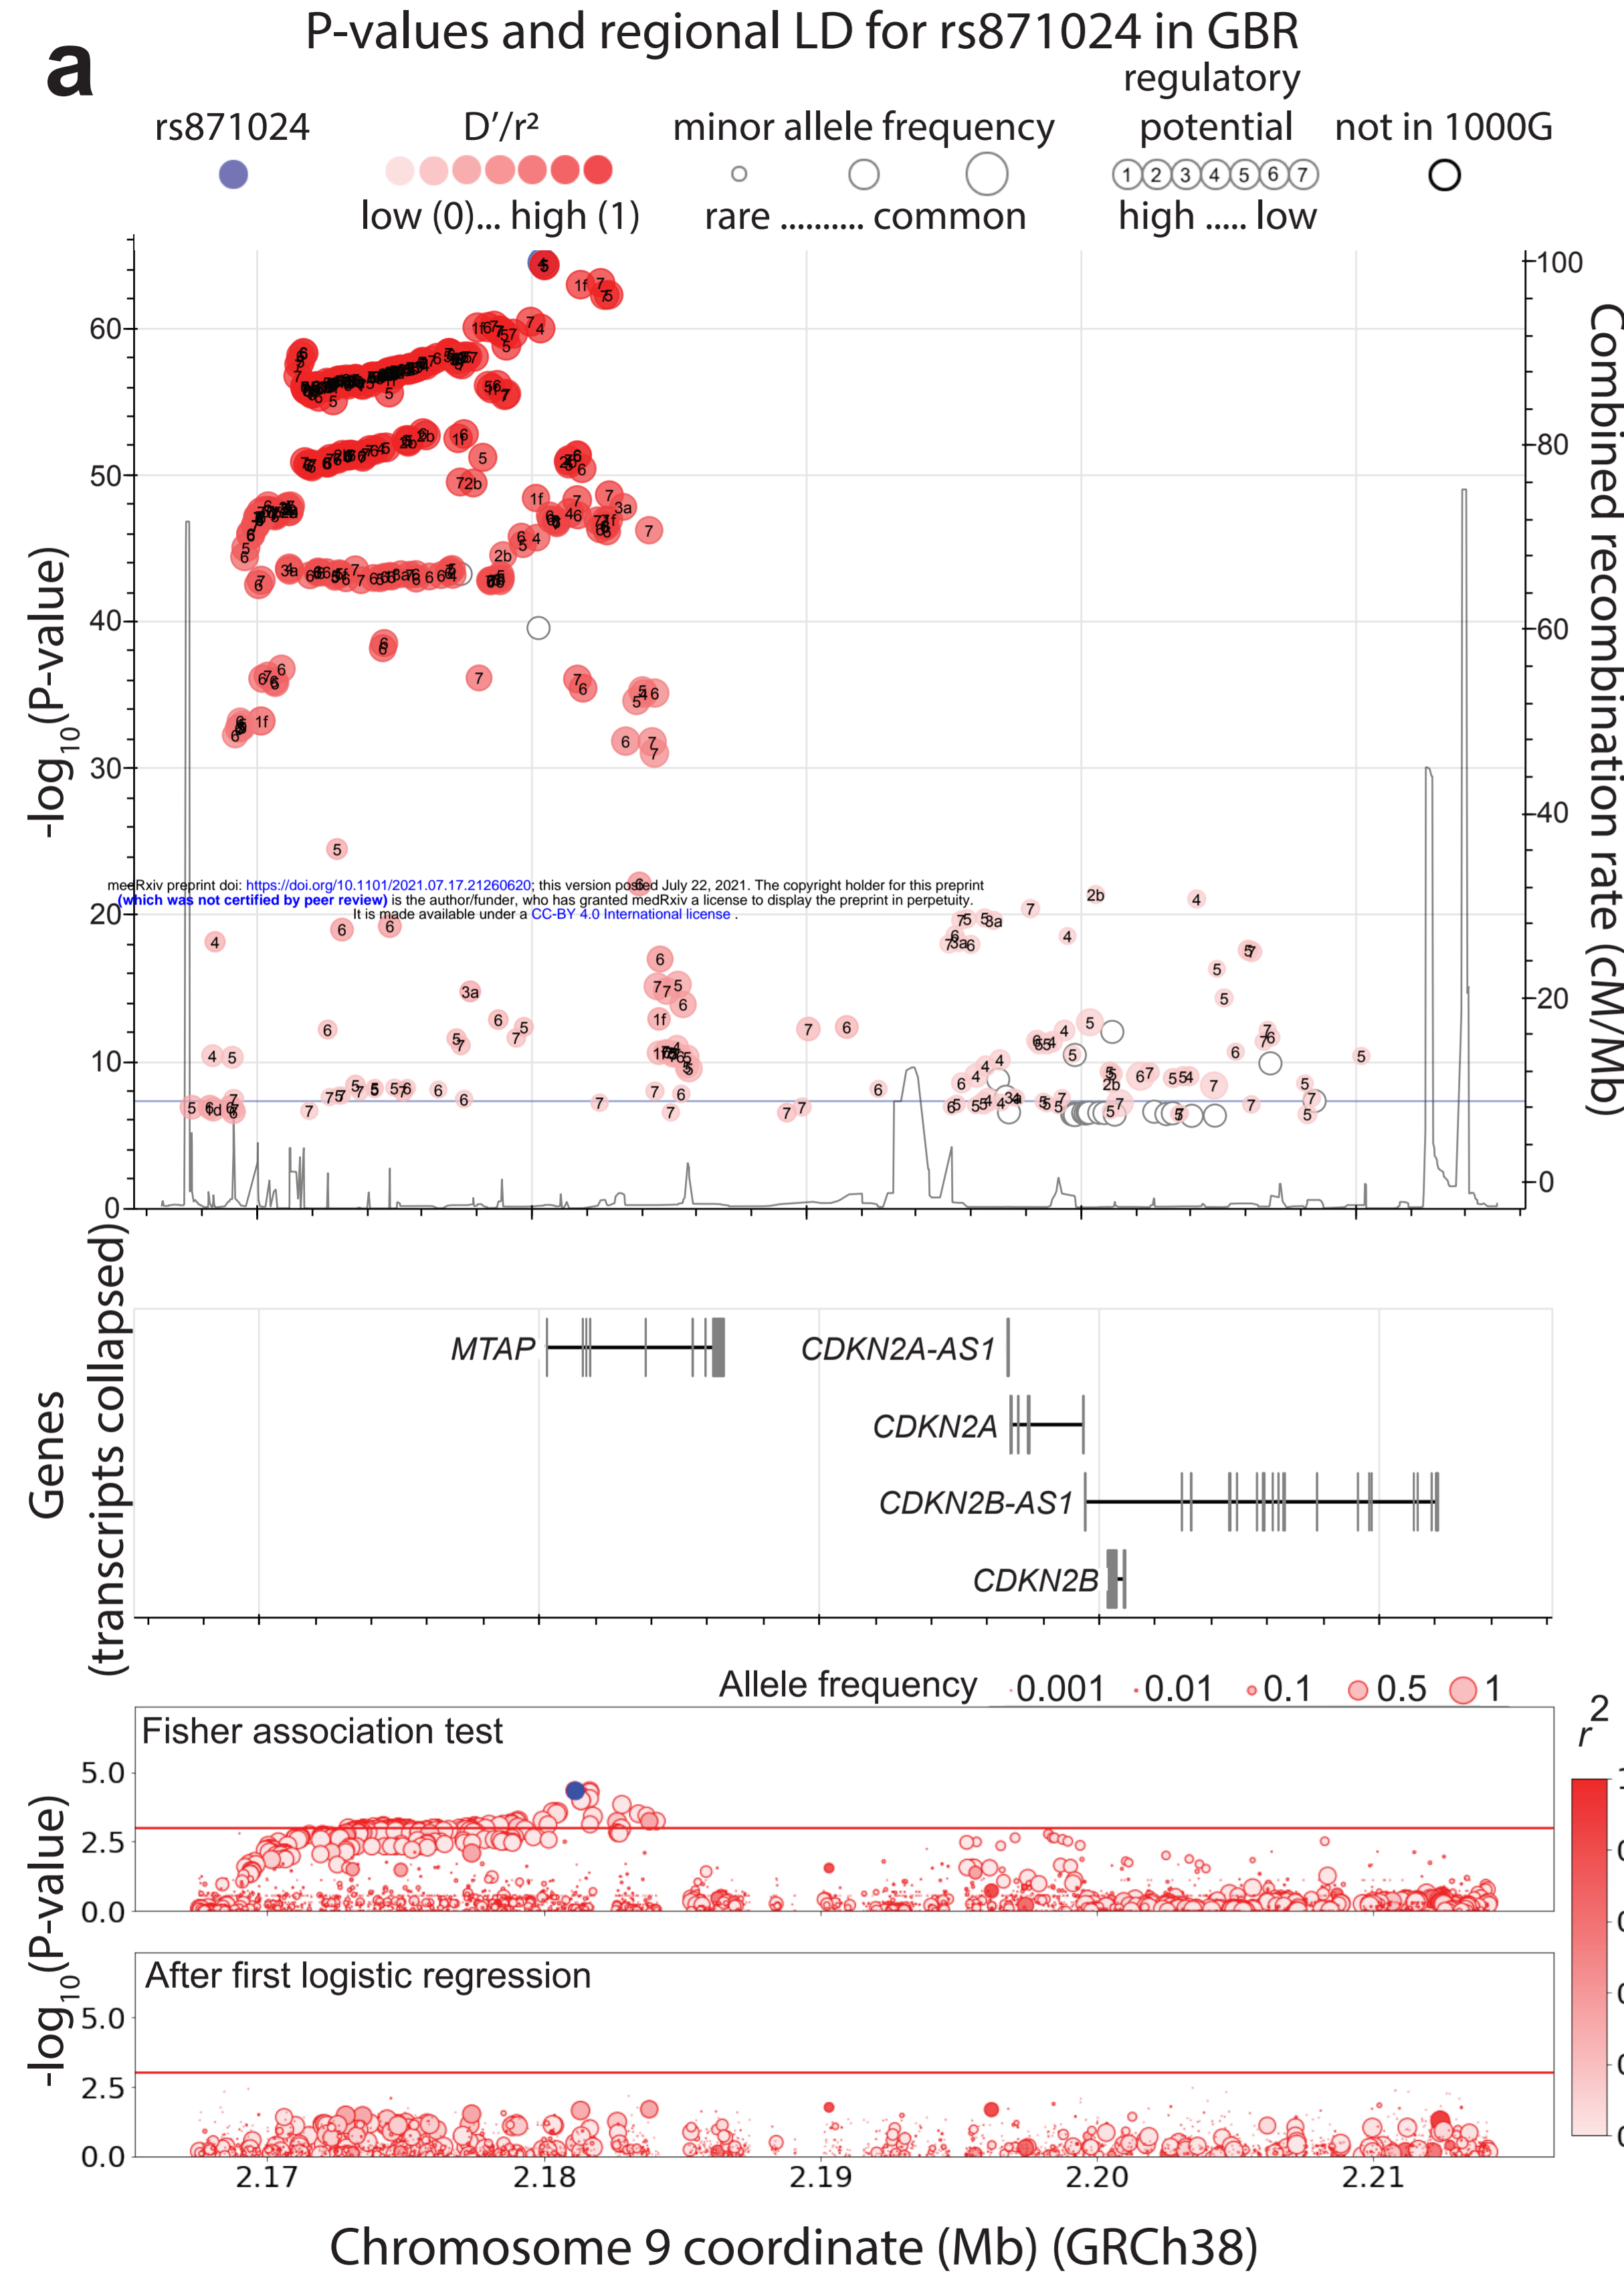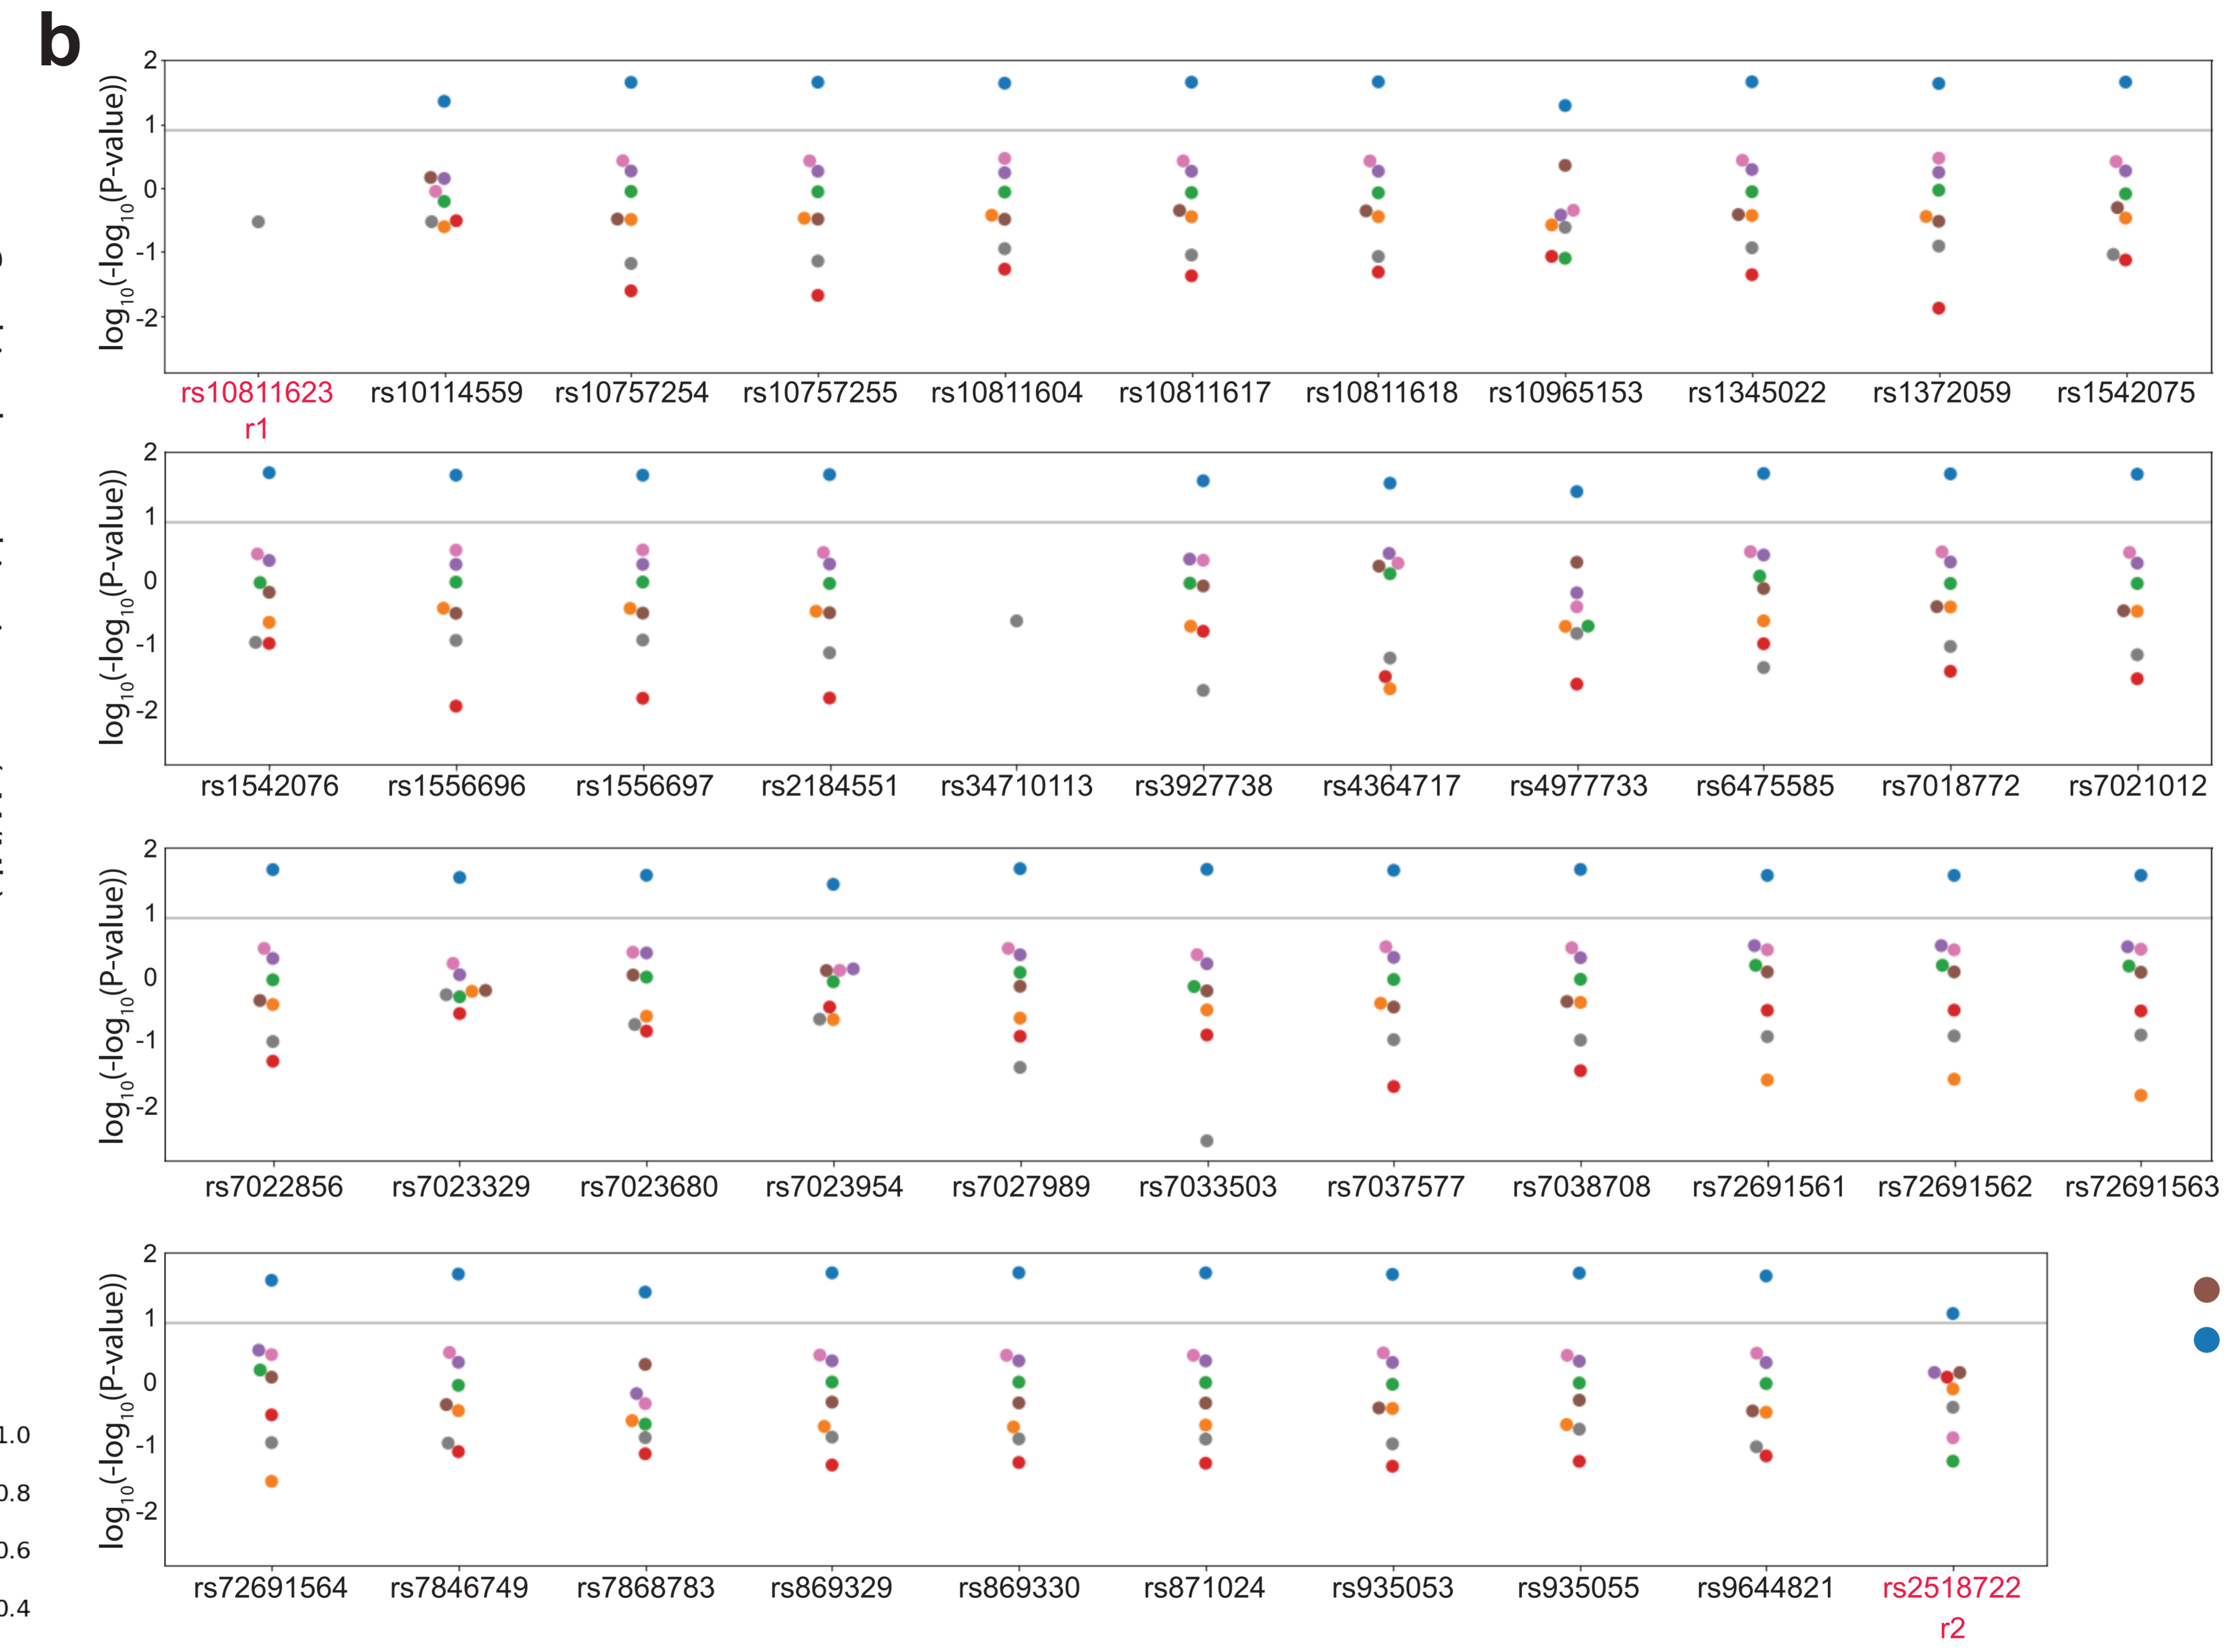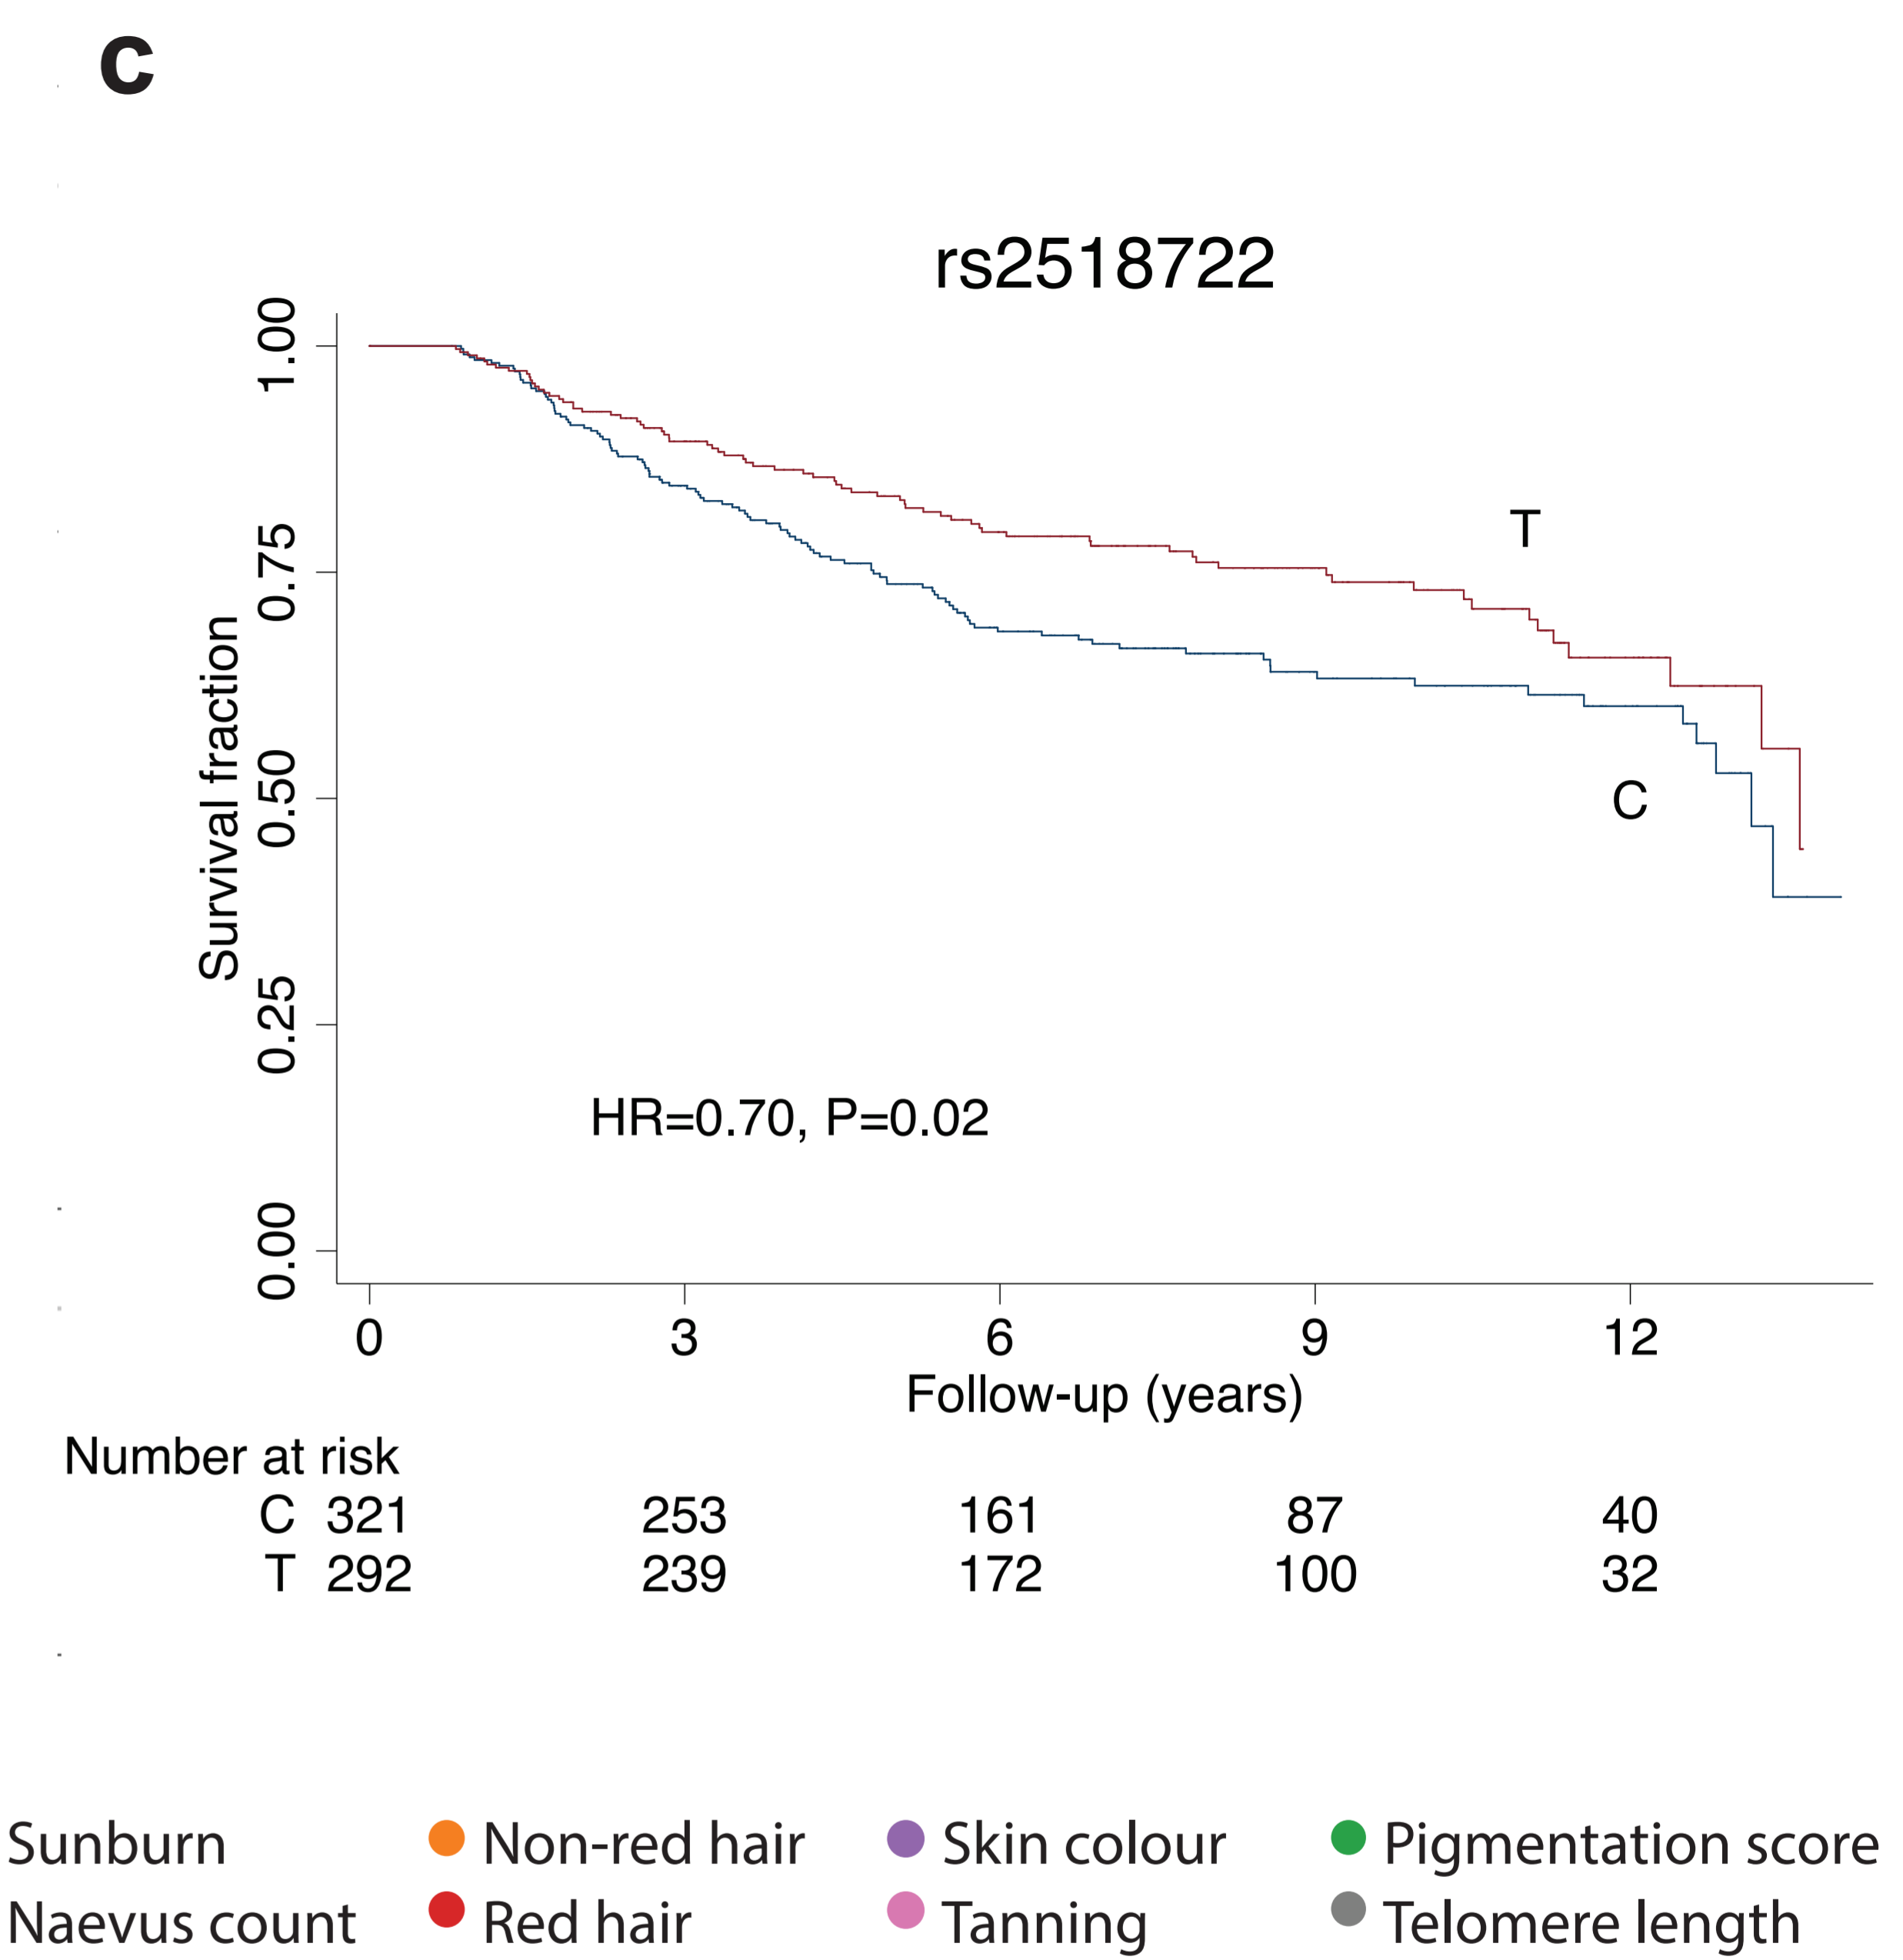

Figure 4

P-values and regional LD for rs3769823 in GBR

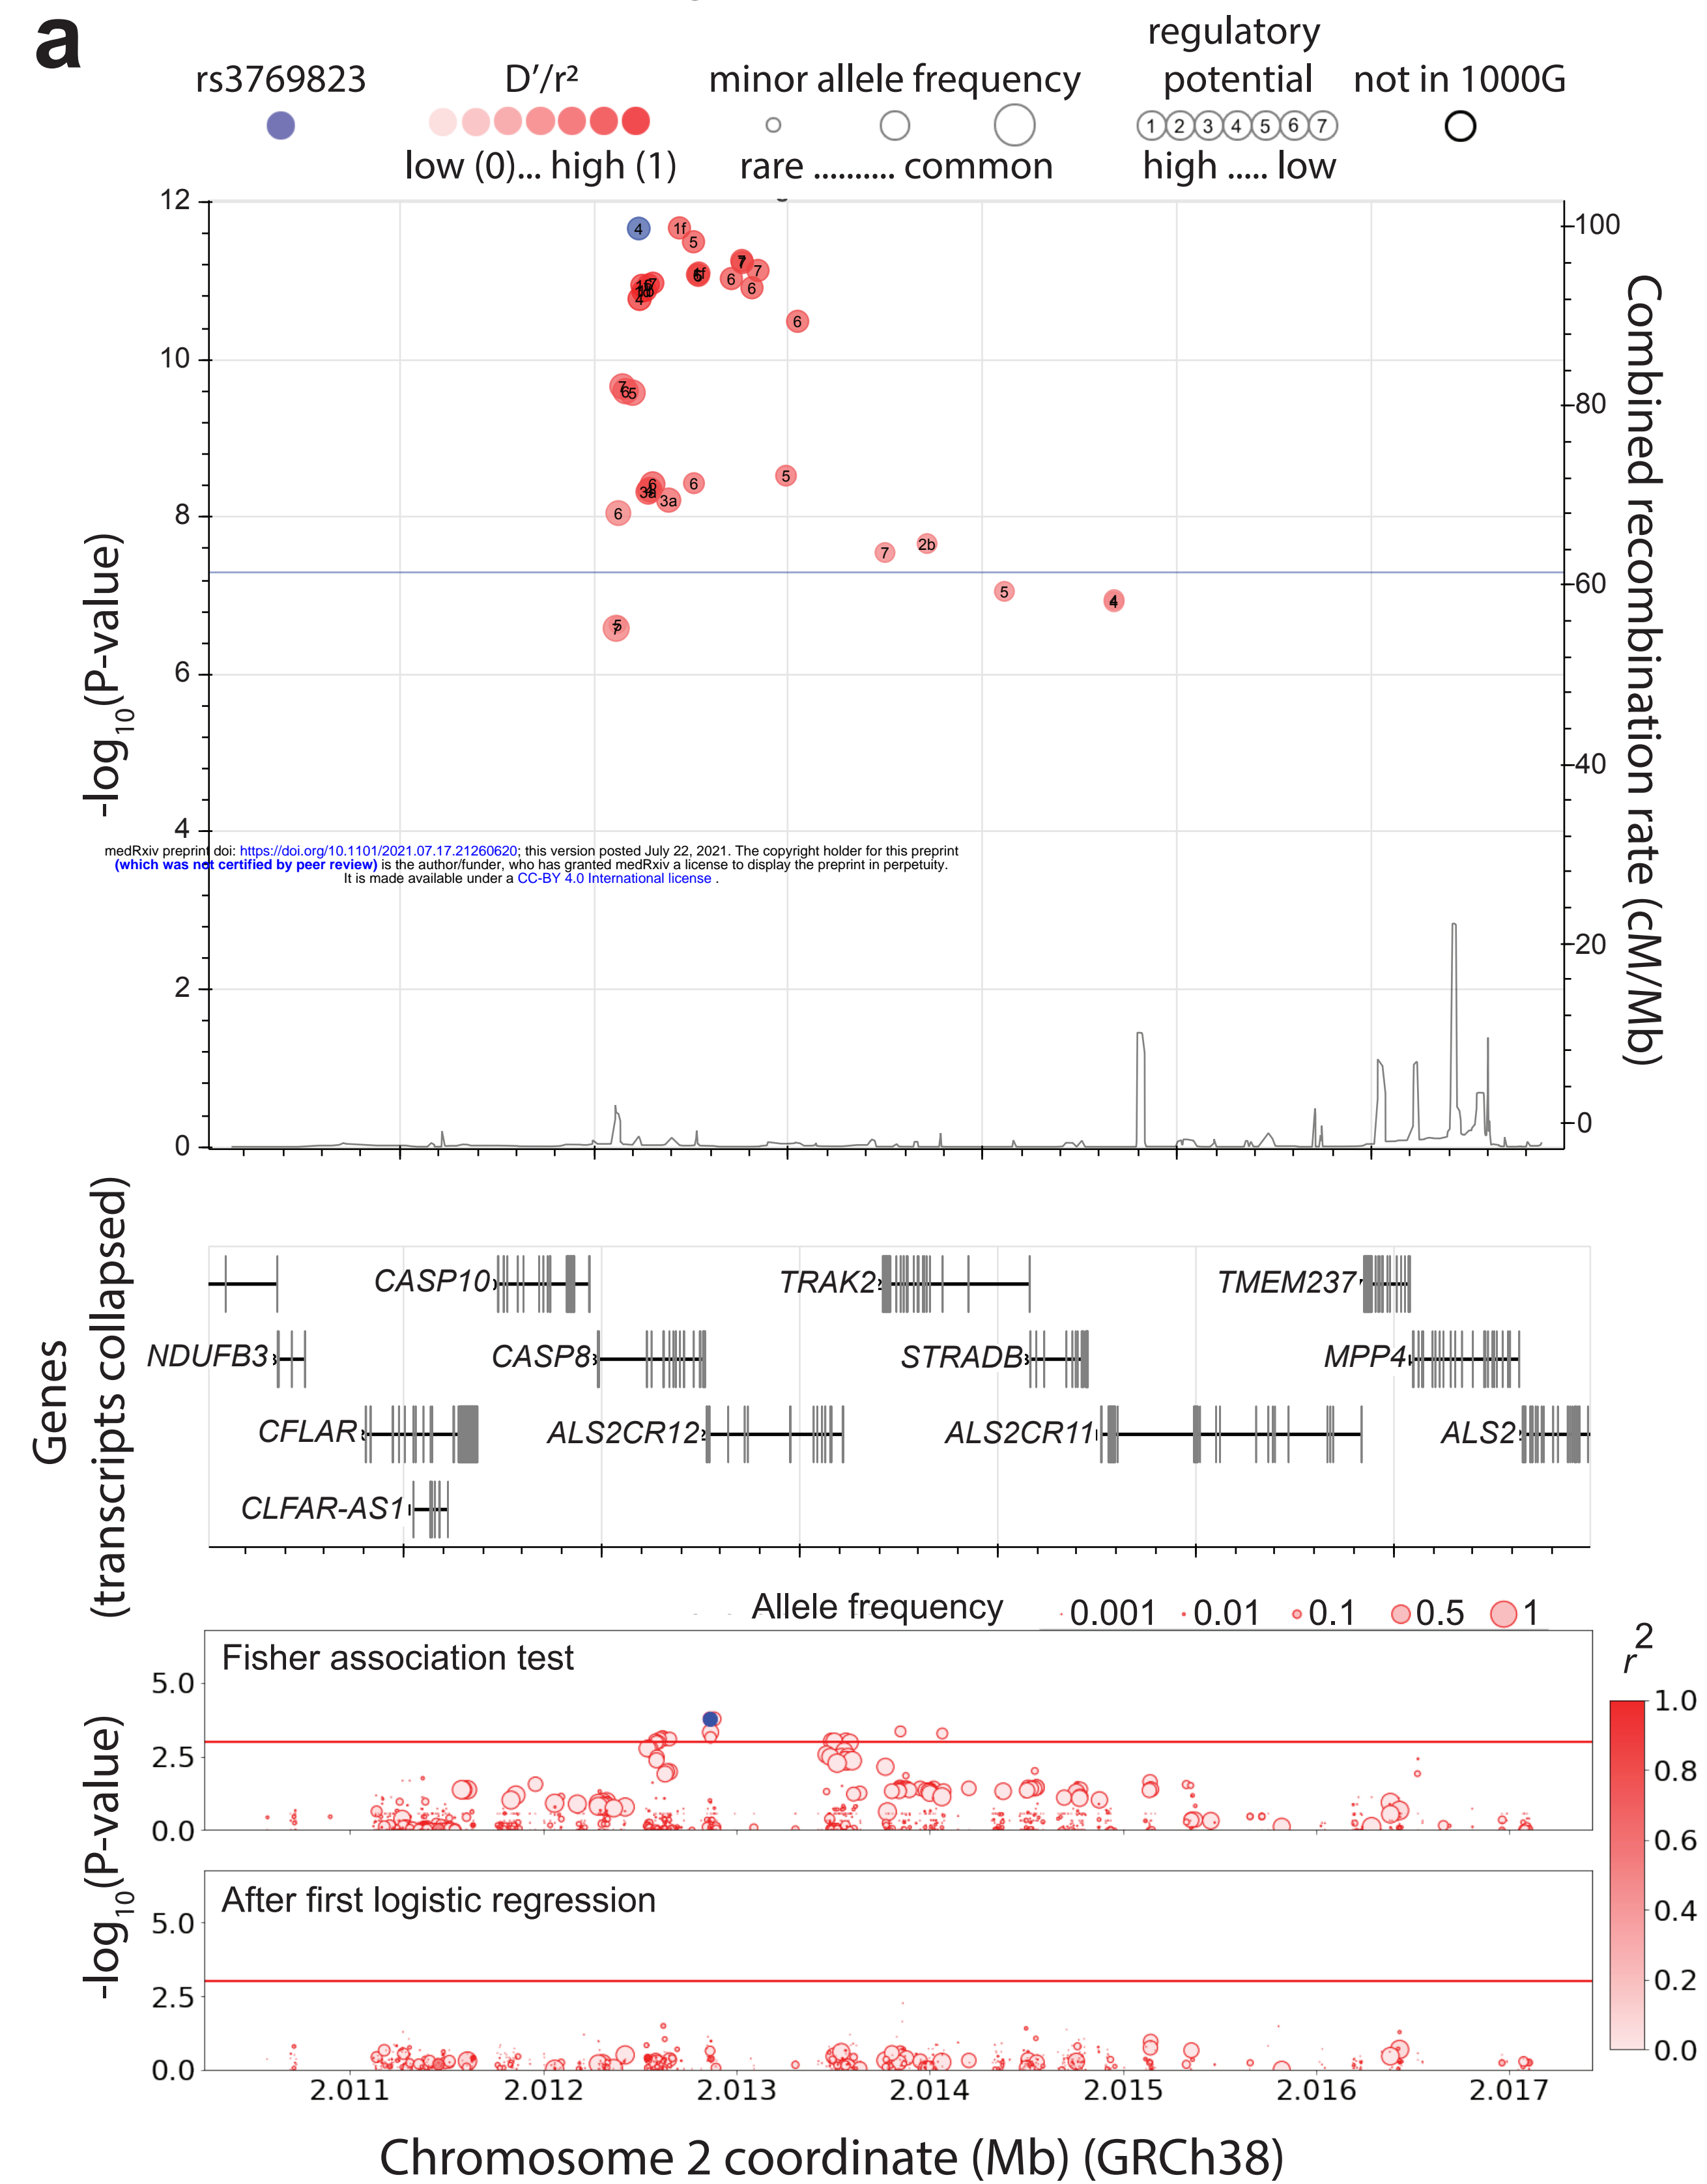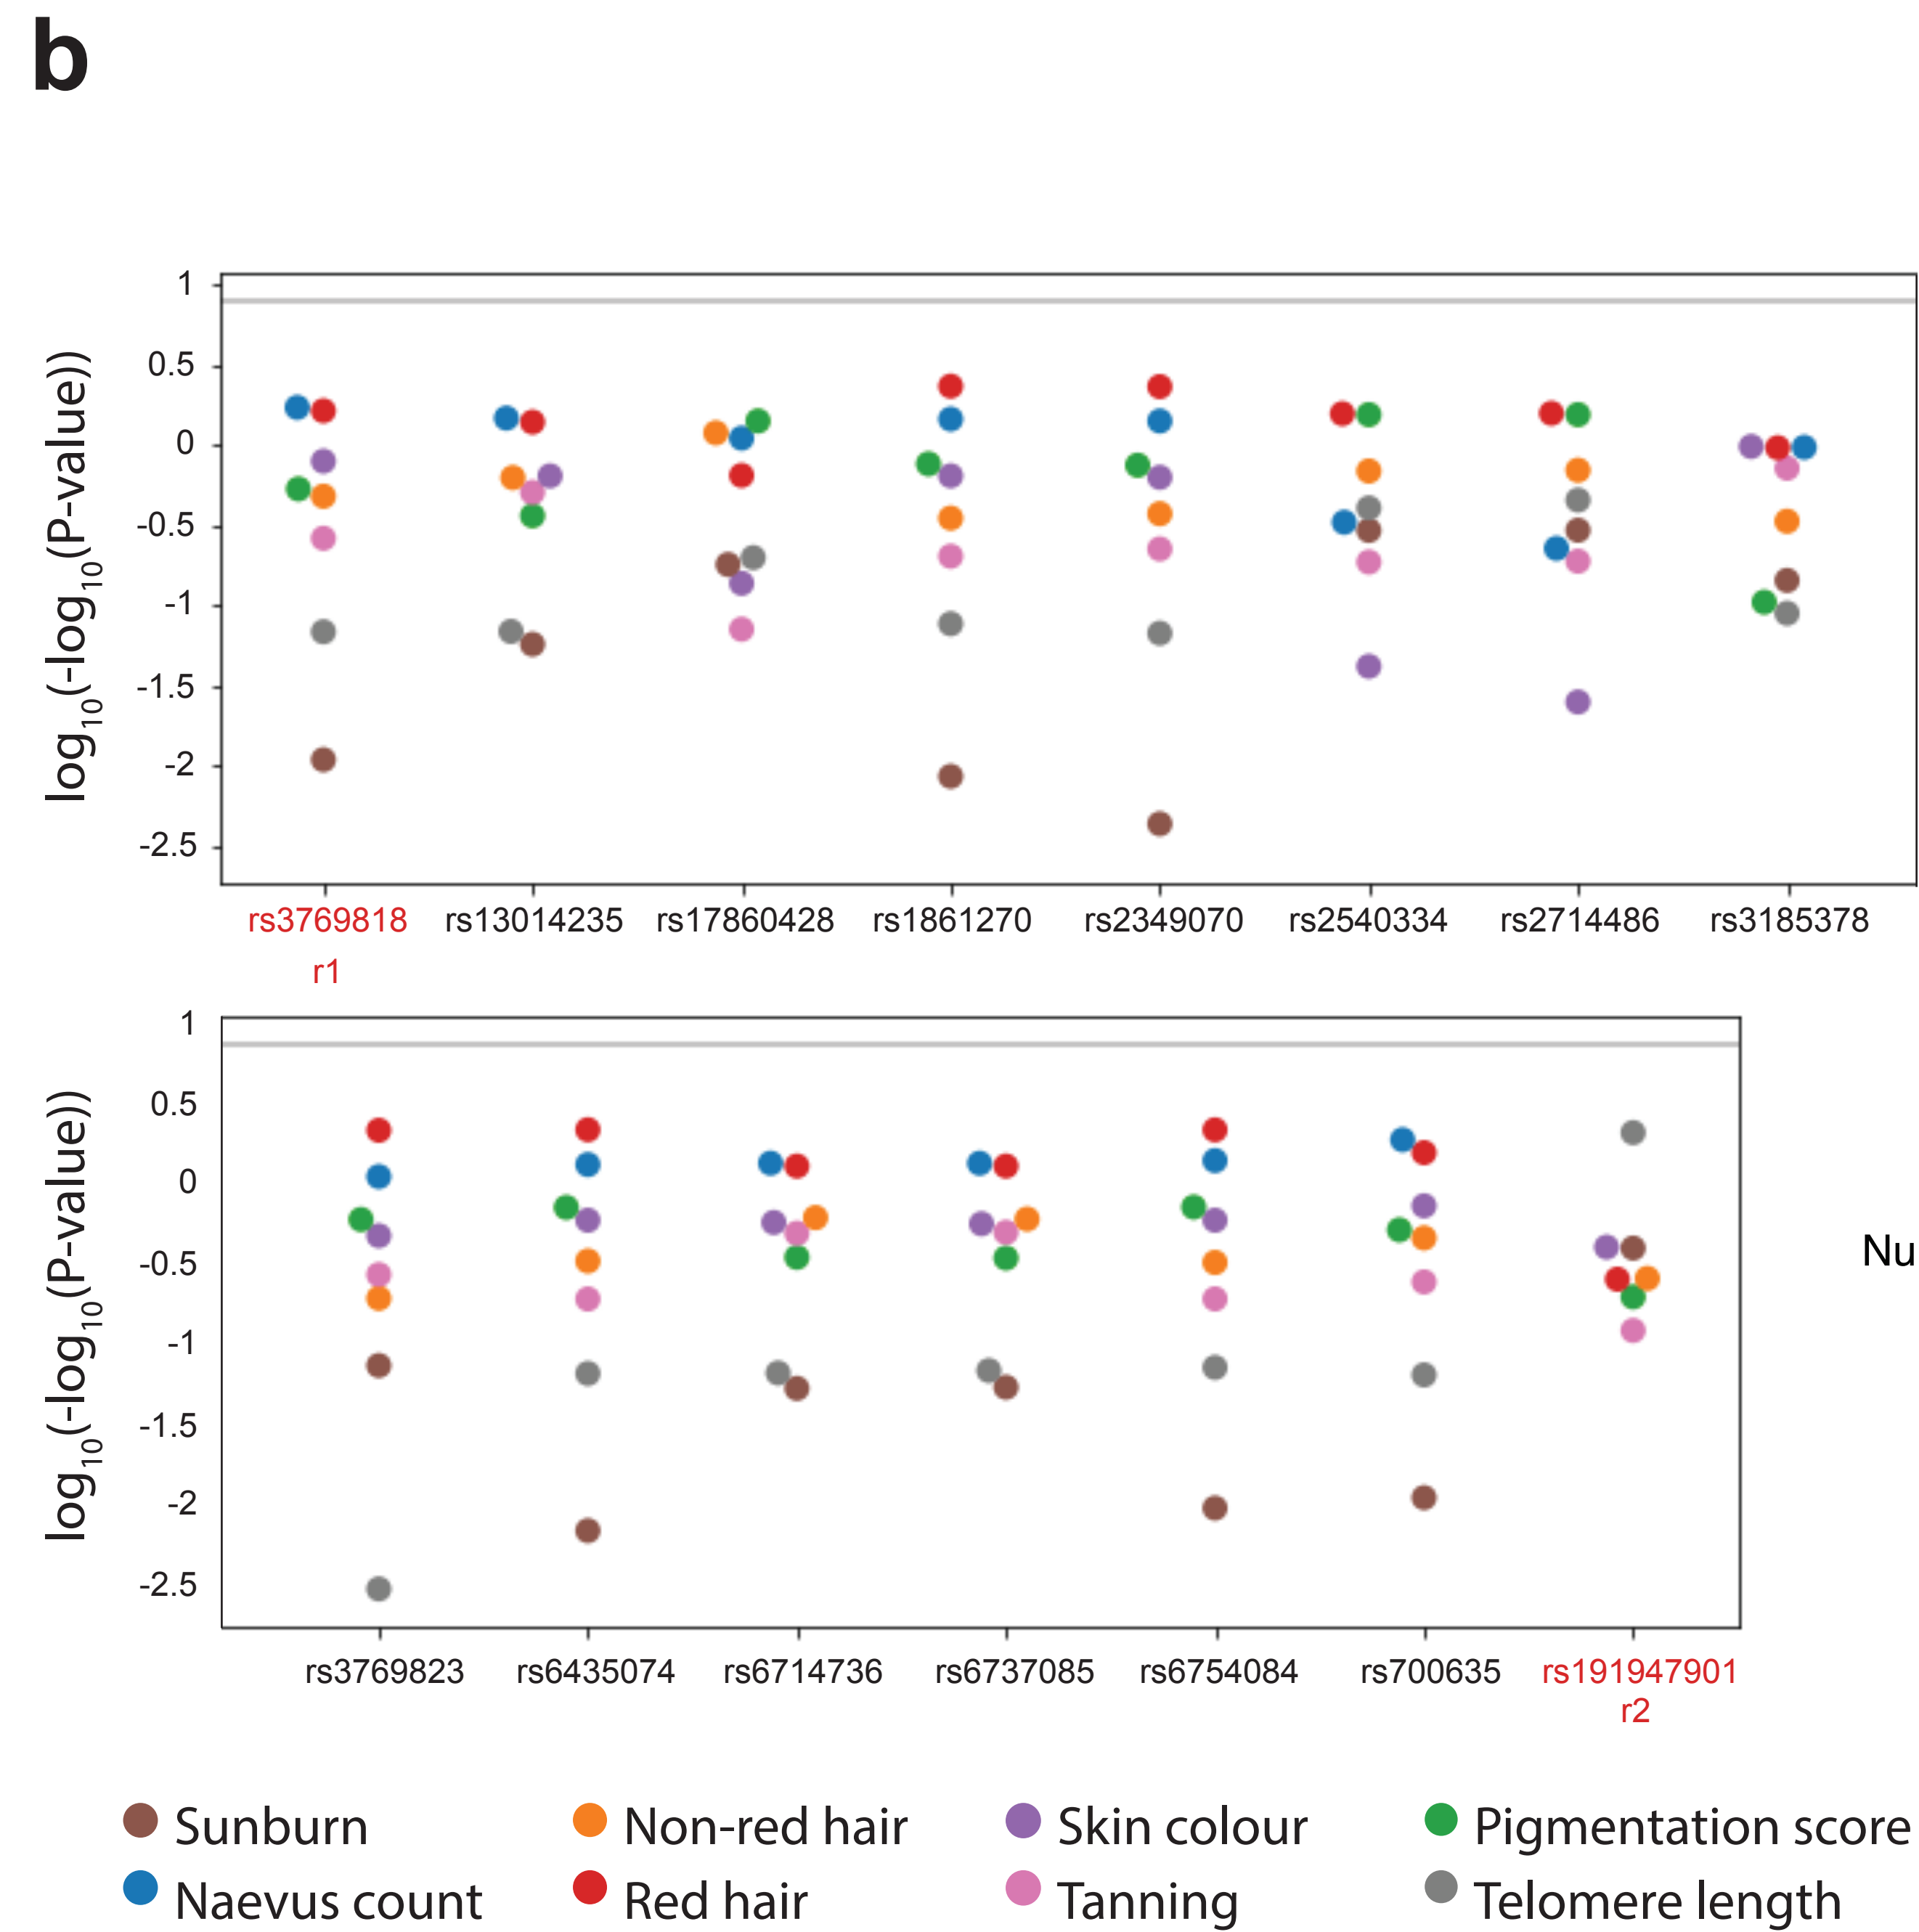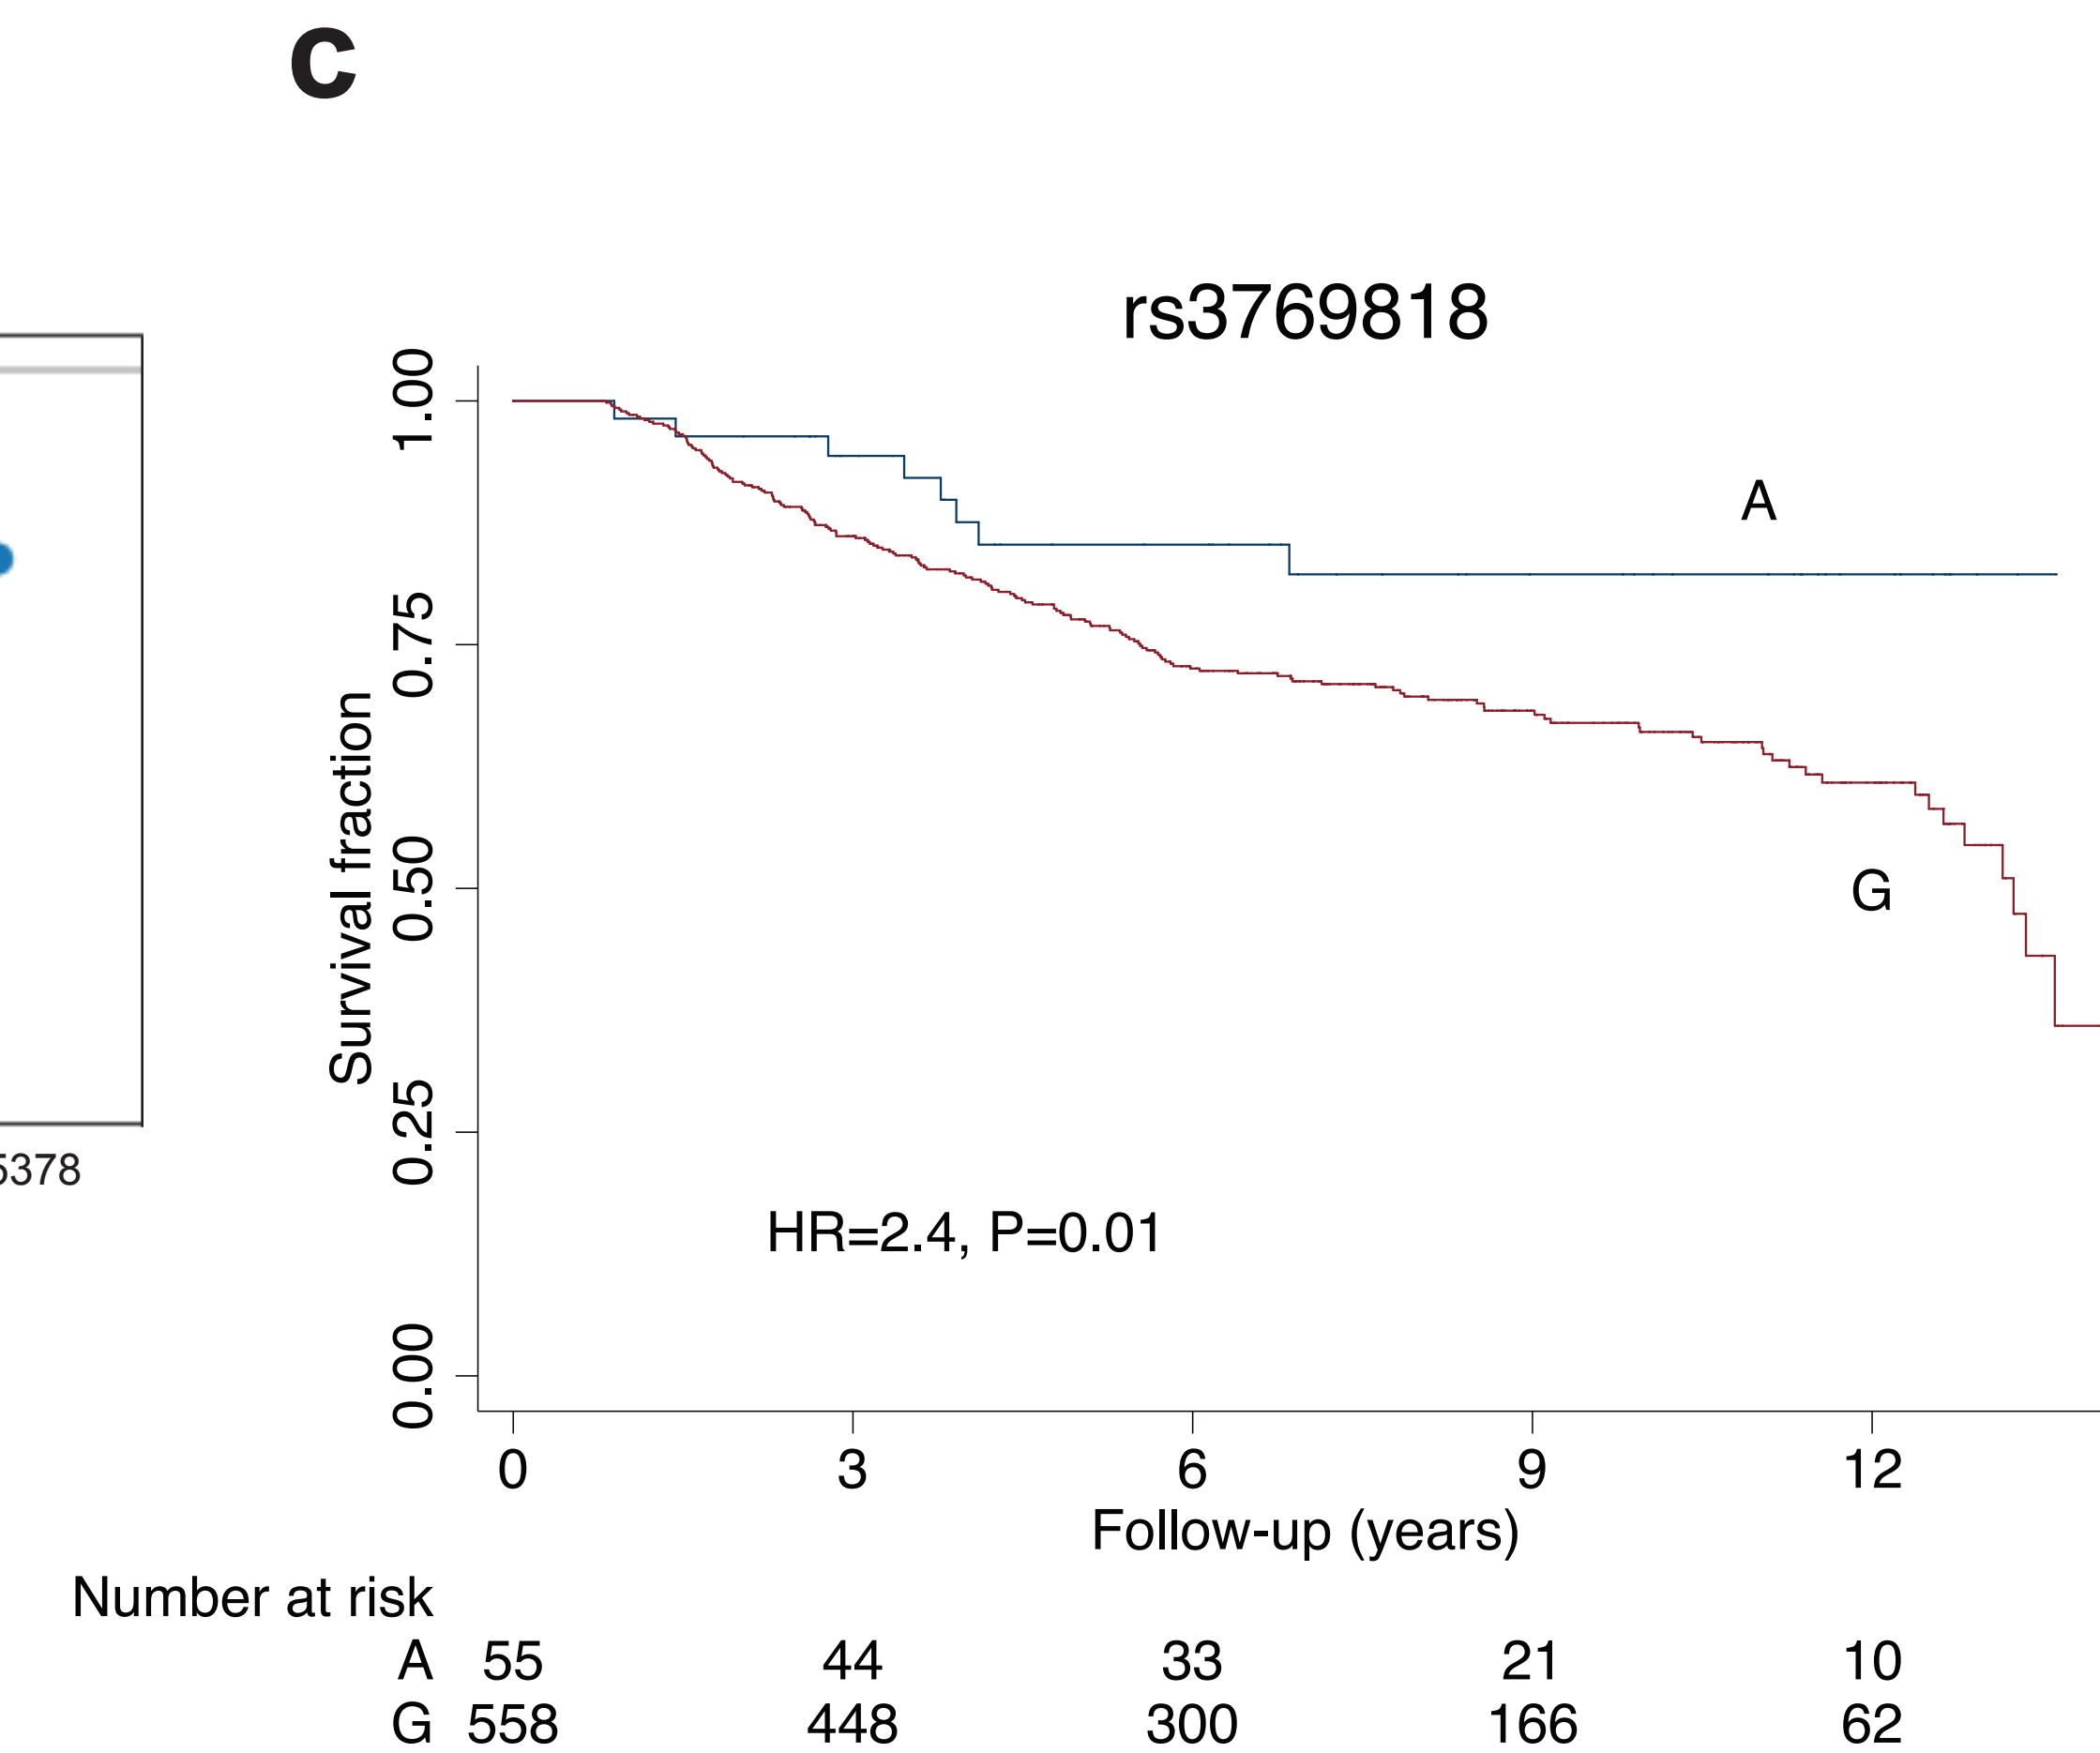

Figure 5

**Table 1. Loci included in this study.** The location (GRCh38), genes of interest and the targeted regions associated to each locus are indicated.

| Location (GRCh38)         | Genes of Interest Encoded in the Region | Targeted regions                                                                    |
|---------------------------|-----------------------------------------|-------------------------------------------------------------------------------------|
| chr1:150754900-151073108  | <i>ARNT, SETDB1</i>                     | Exons, promoters and DHSs                                                           |
| chr1:226258651-226499883  | <i>PARP1</i>                            | Exons, promoters and DHSs                                                           |
| chr2:201047085-201724509  | <i>CASP8, ALS2CR12, CFLAR, TRAK2</i>    | Exons, promoters and DHSs                                                           |
| chr4:24692289-25055958    | <i>SOD3, CCDC149</i>                    | Exons and promoters                                                                 |
| chr5:1142197-1447788      | <i>TERT, CLPTM1L</i>                    | Full locus                                                                          |
| chr5:33840139-34064027    | <i>SLC45A2</i>                          | Exons, promoters and DHSs                                                           |
| chr6:83948233-84292890    | <i>MRAP2, KIAA1009</i>                  | Exons and promoters                                                                 |
| chr9:21665209-22151817    | <i>MTAP, CDKN2A, CDKN2B, ANRIL</i>      | Full locus                                                                          |
| chr11:69210414-69803433   | <i>CCND1, MYEOV, ORAOV1, FGF19</i>      | Exons, promoters and DHSs                                                           |
| chr11:89097917-89675699   | <i>TYR, NOX4</i>                        | Exons, promoters and DHSs                                                           |
| chr11:108136364-108468324 | <i>ATM</i>                              | Exons, promoters and DHSs                                                           |
| chr15:27670078-28337214   | <i>OCA2, HERC2</i>                      | Exons and promoters                                                                 |
| chr16:53363904-54384452   | <i>FTO, IRX3, RBL2</i>                  | Exons, promoters ( <i>FTO, IRX3, RBL2</i> ) and DHSs ( <i>FTO</i> and <i>IRX3</i> ) |
| chr16:68528729-68923897   | <i>CDH1, CDH3</i>                       | Exons and promoters                                                                 |
| chr16:89806464-90031424   | <i>MC1R</i>                             | Exons and promoters                                                                 |
| chr17:80154433-80508392   | <i>RNF213</i>                           | Exons and promoters                                                                 |
| chr20:33709976-34374270   | <i>ASIP, RALY, EIF2S2, CHMP4B</i>       | Exons, promoters and DHSs                                                           |
| chr21:41194545-41512249   | <i>MX2, FAM3B</i>                       | Exons, promoters and DHSs                                                           |
| chr22:37870877-38328731   | <i>PLA2G6, SOX10, PICK1, SLC16A8</i>    | Exons, promoters and DHSs                                                           |

**a**

## P-values and regional LD for rs12913832 in GBR

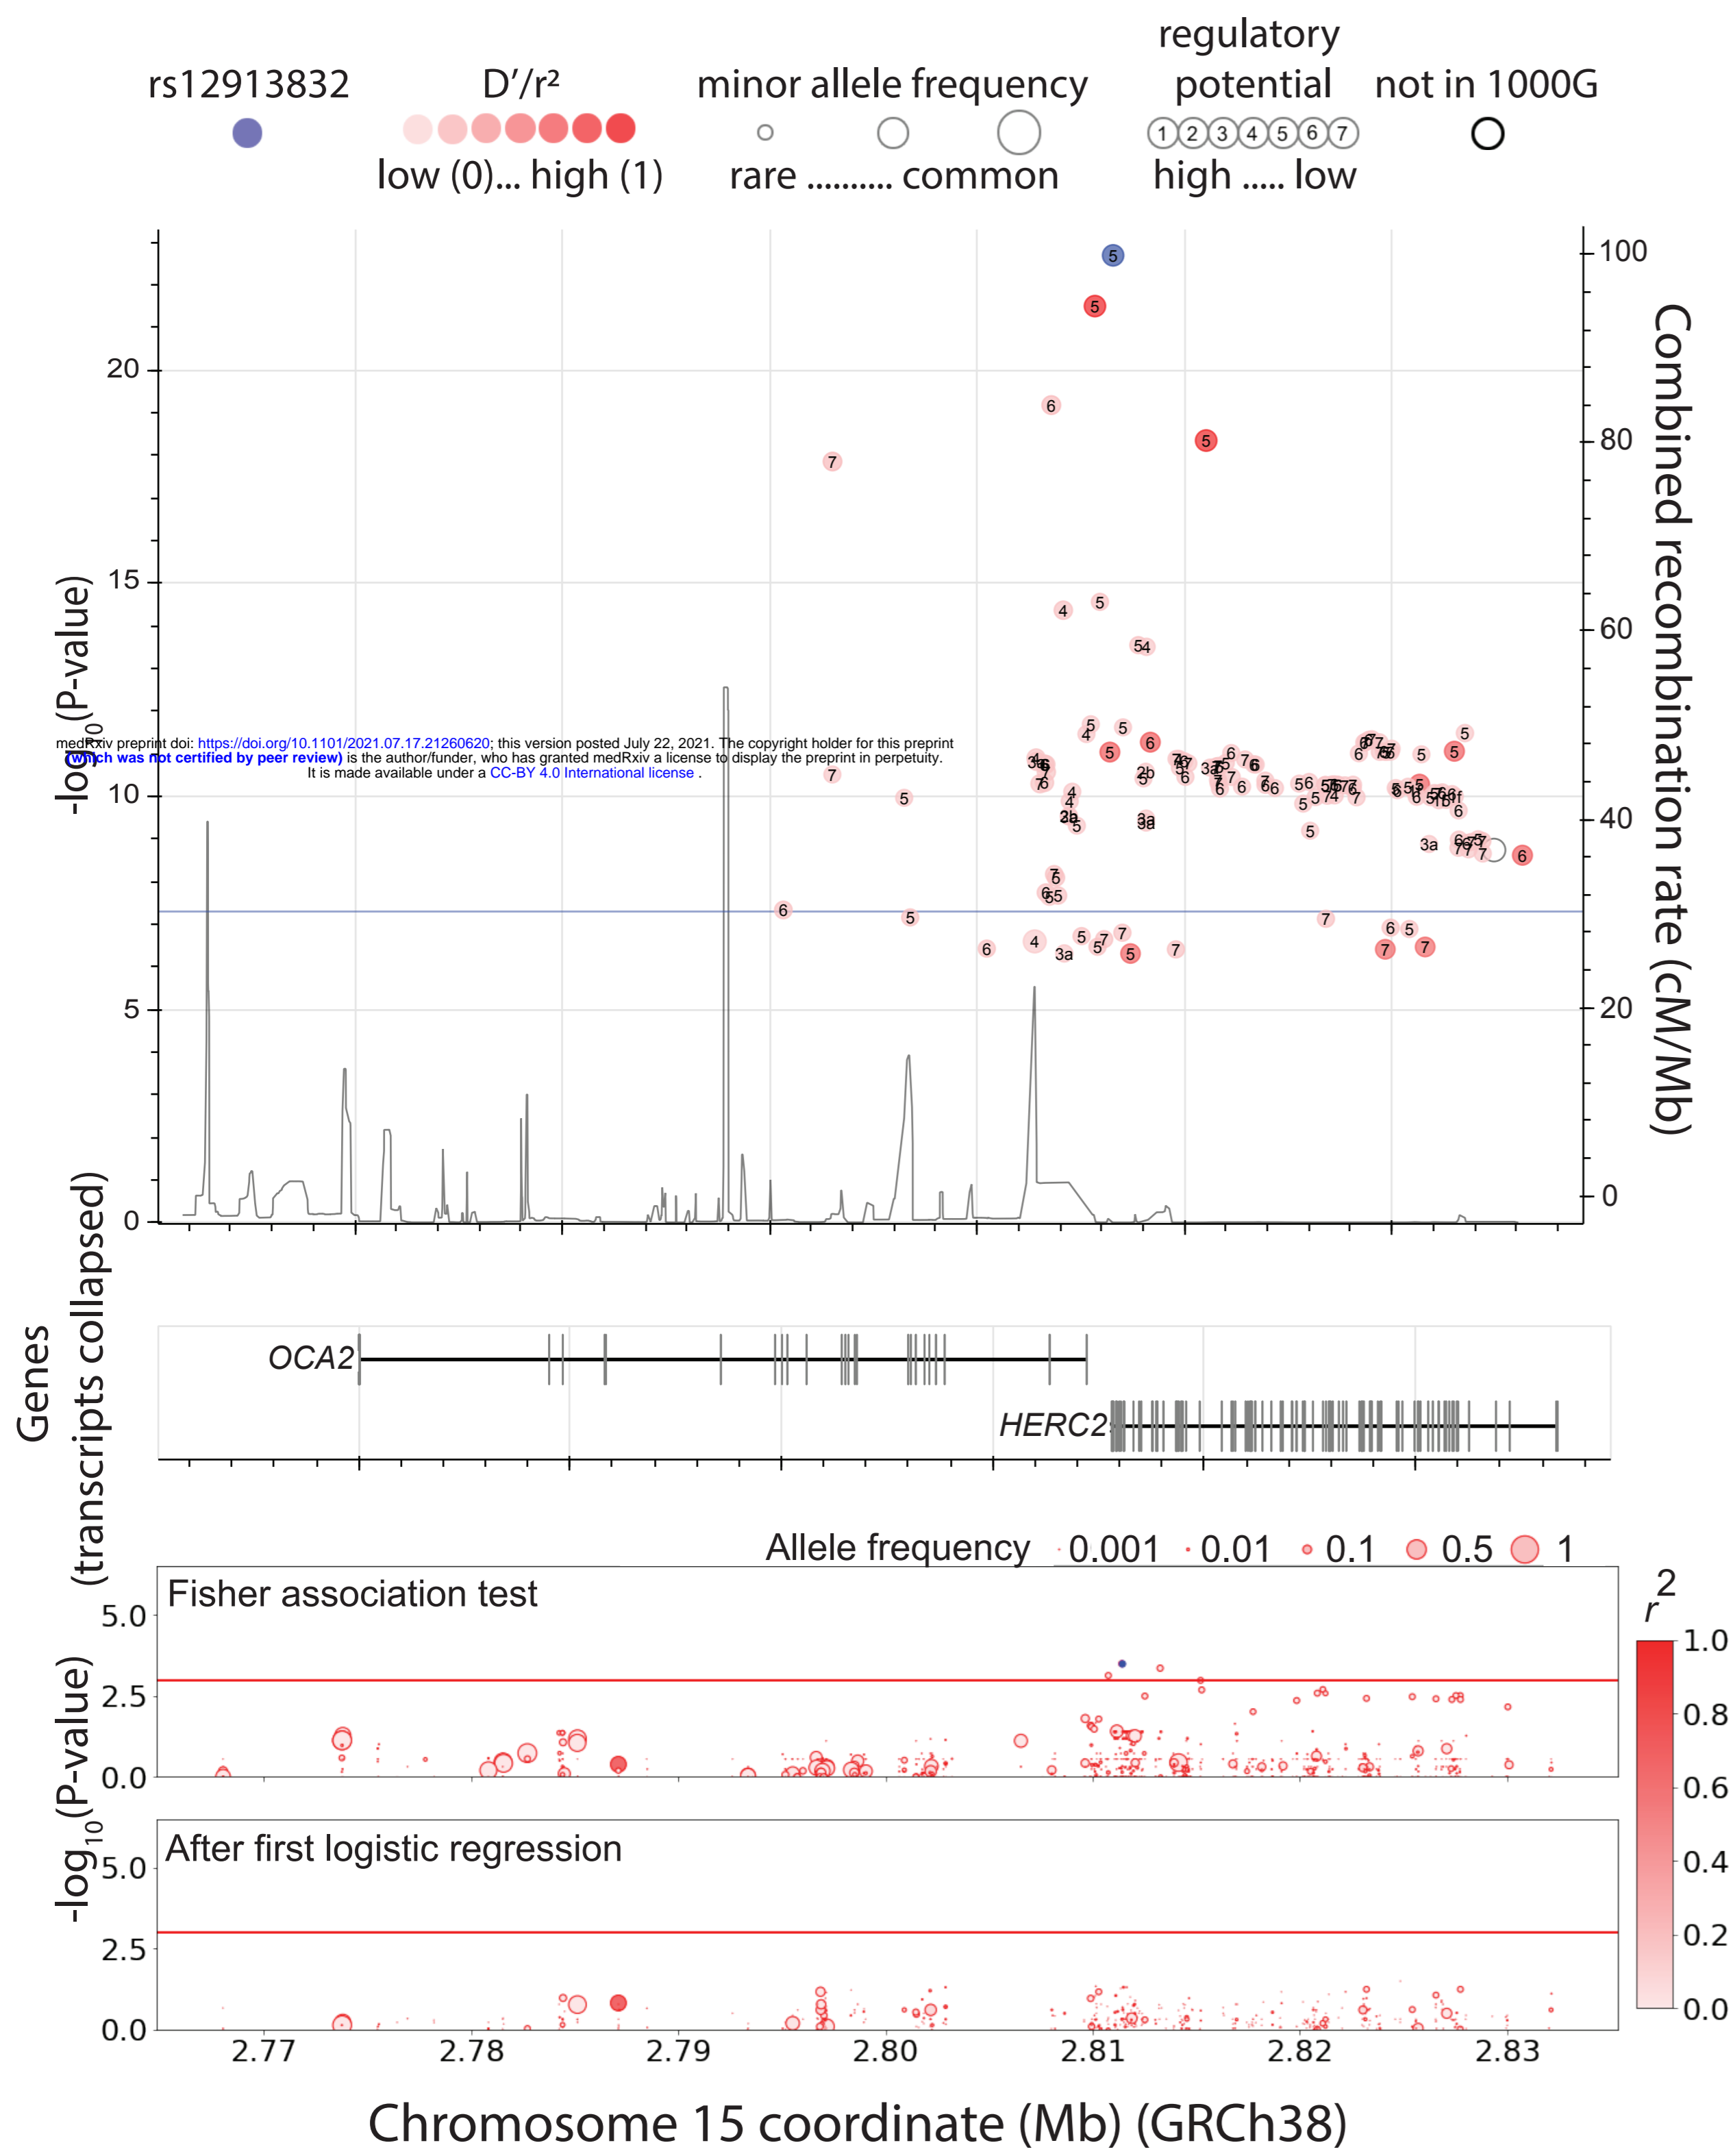**b**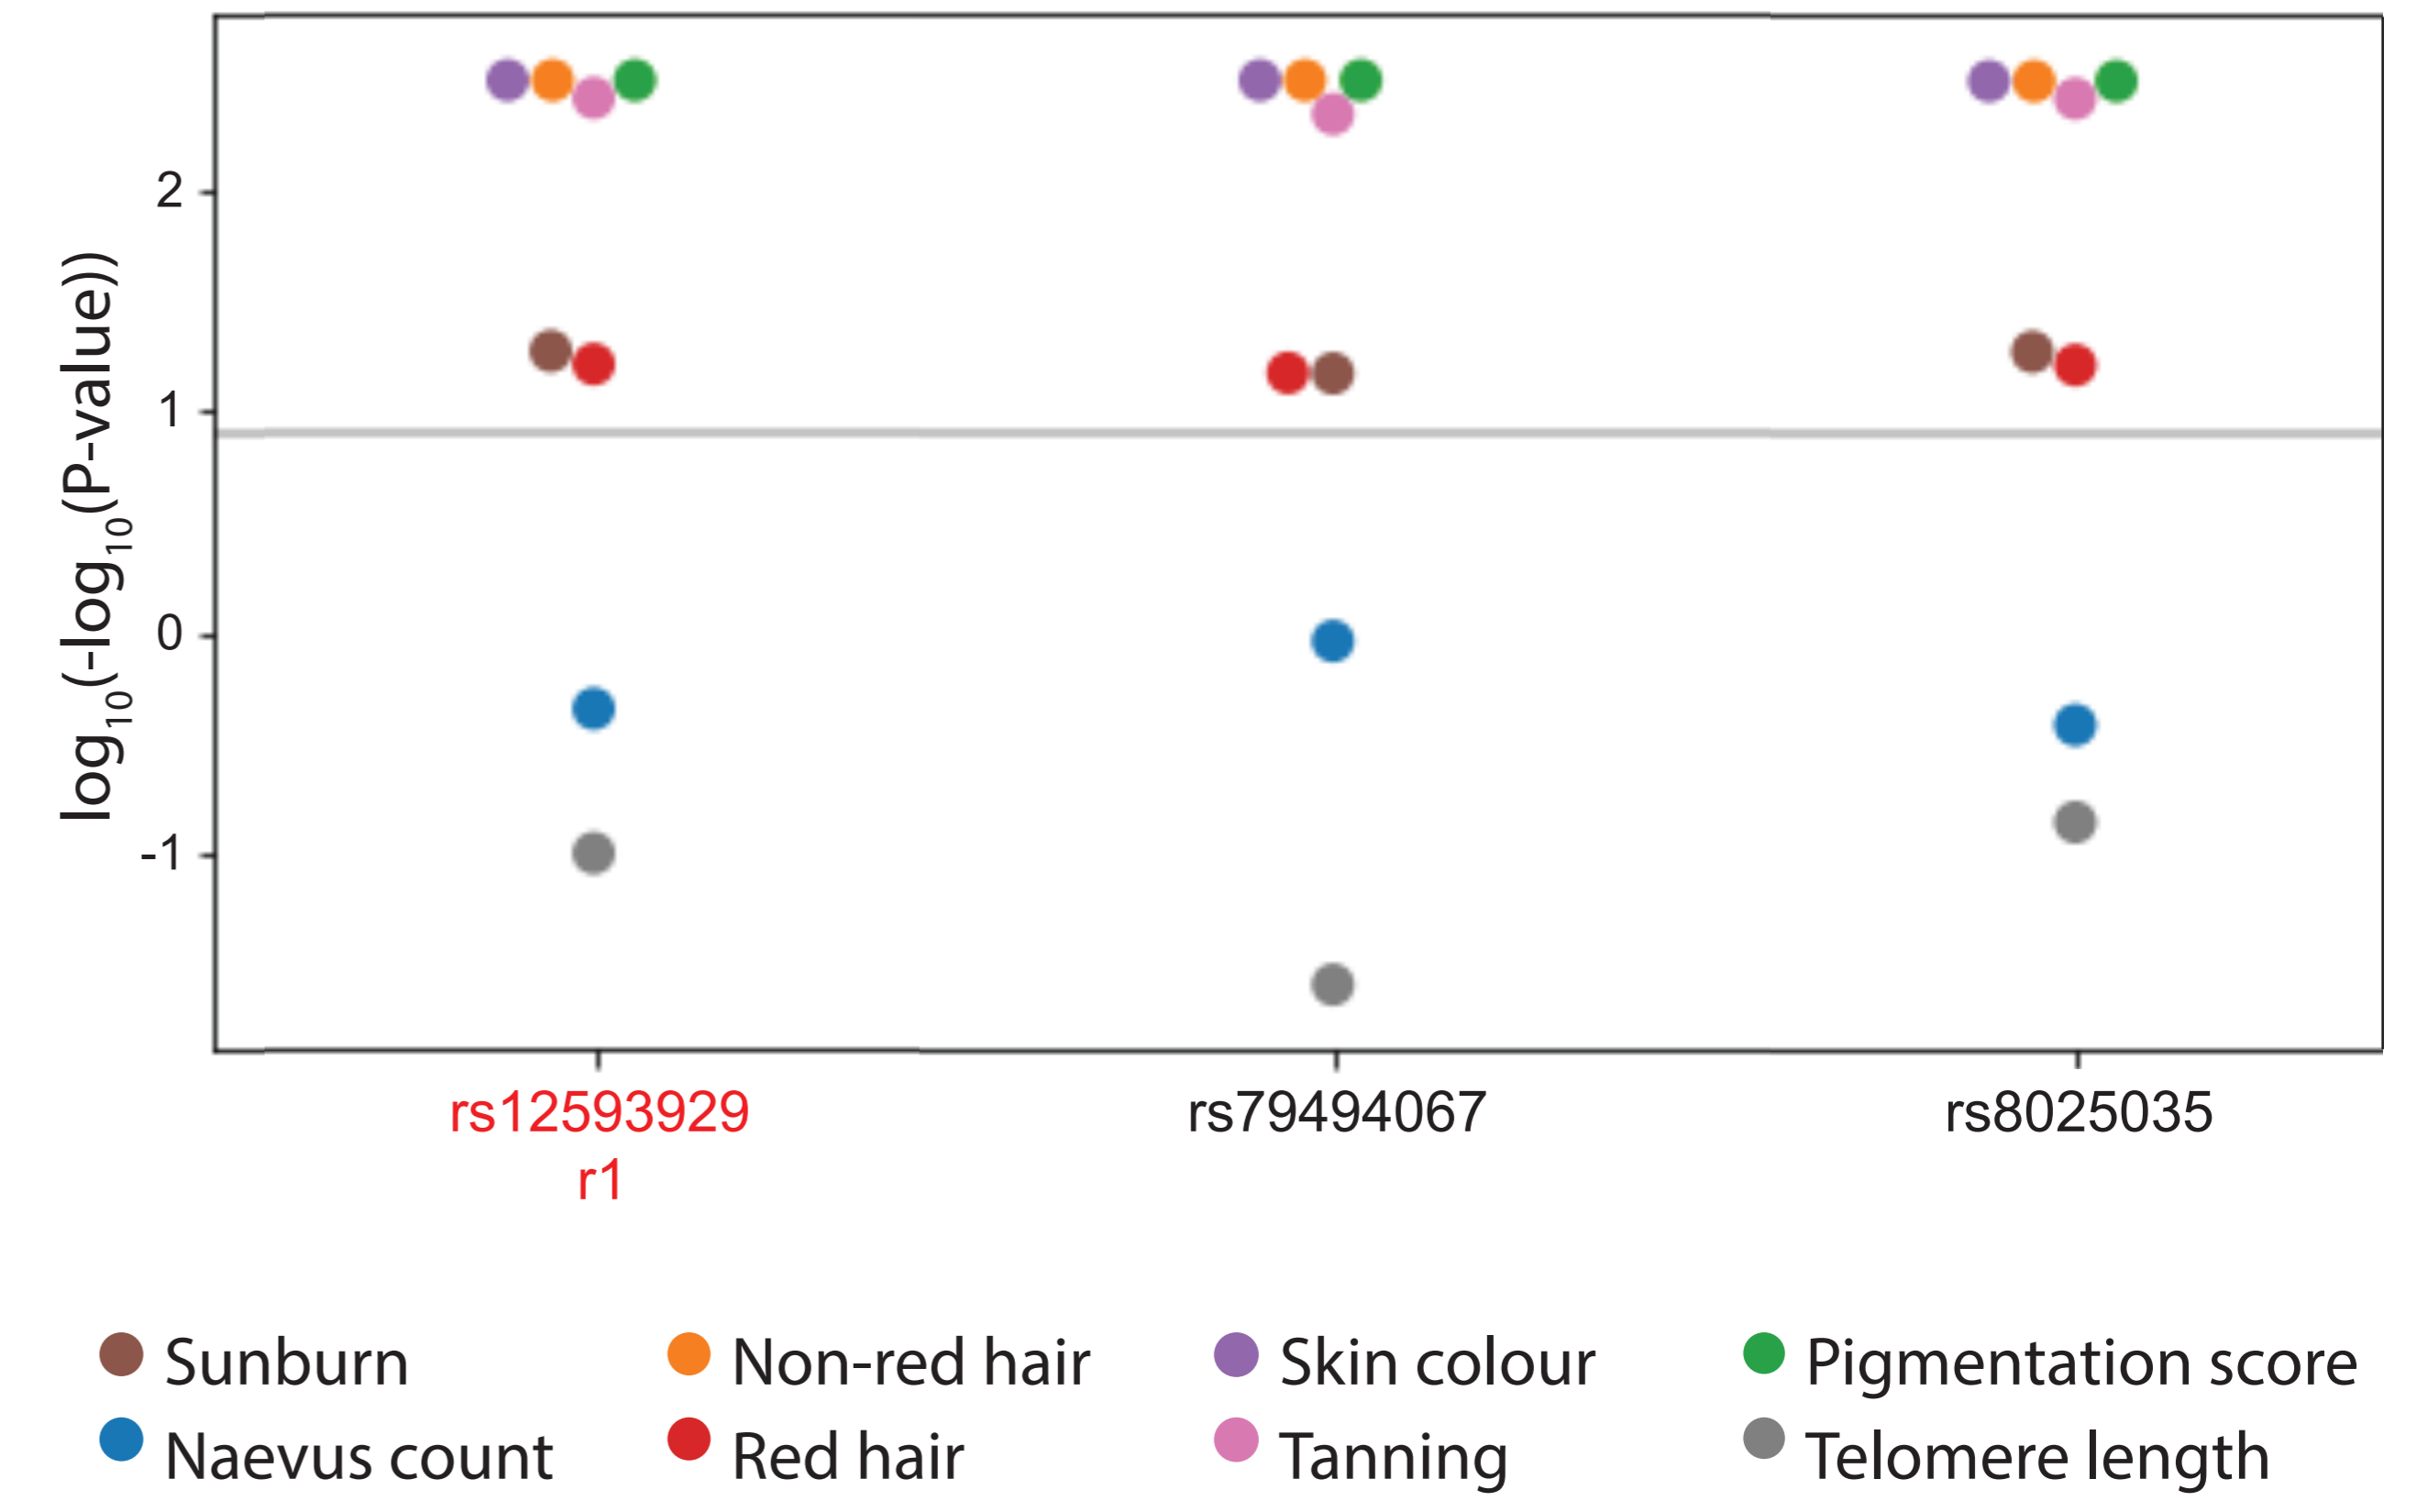

Supplementary Figure 1

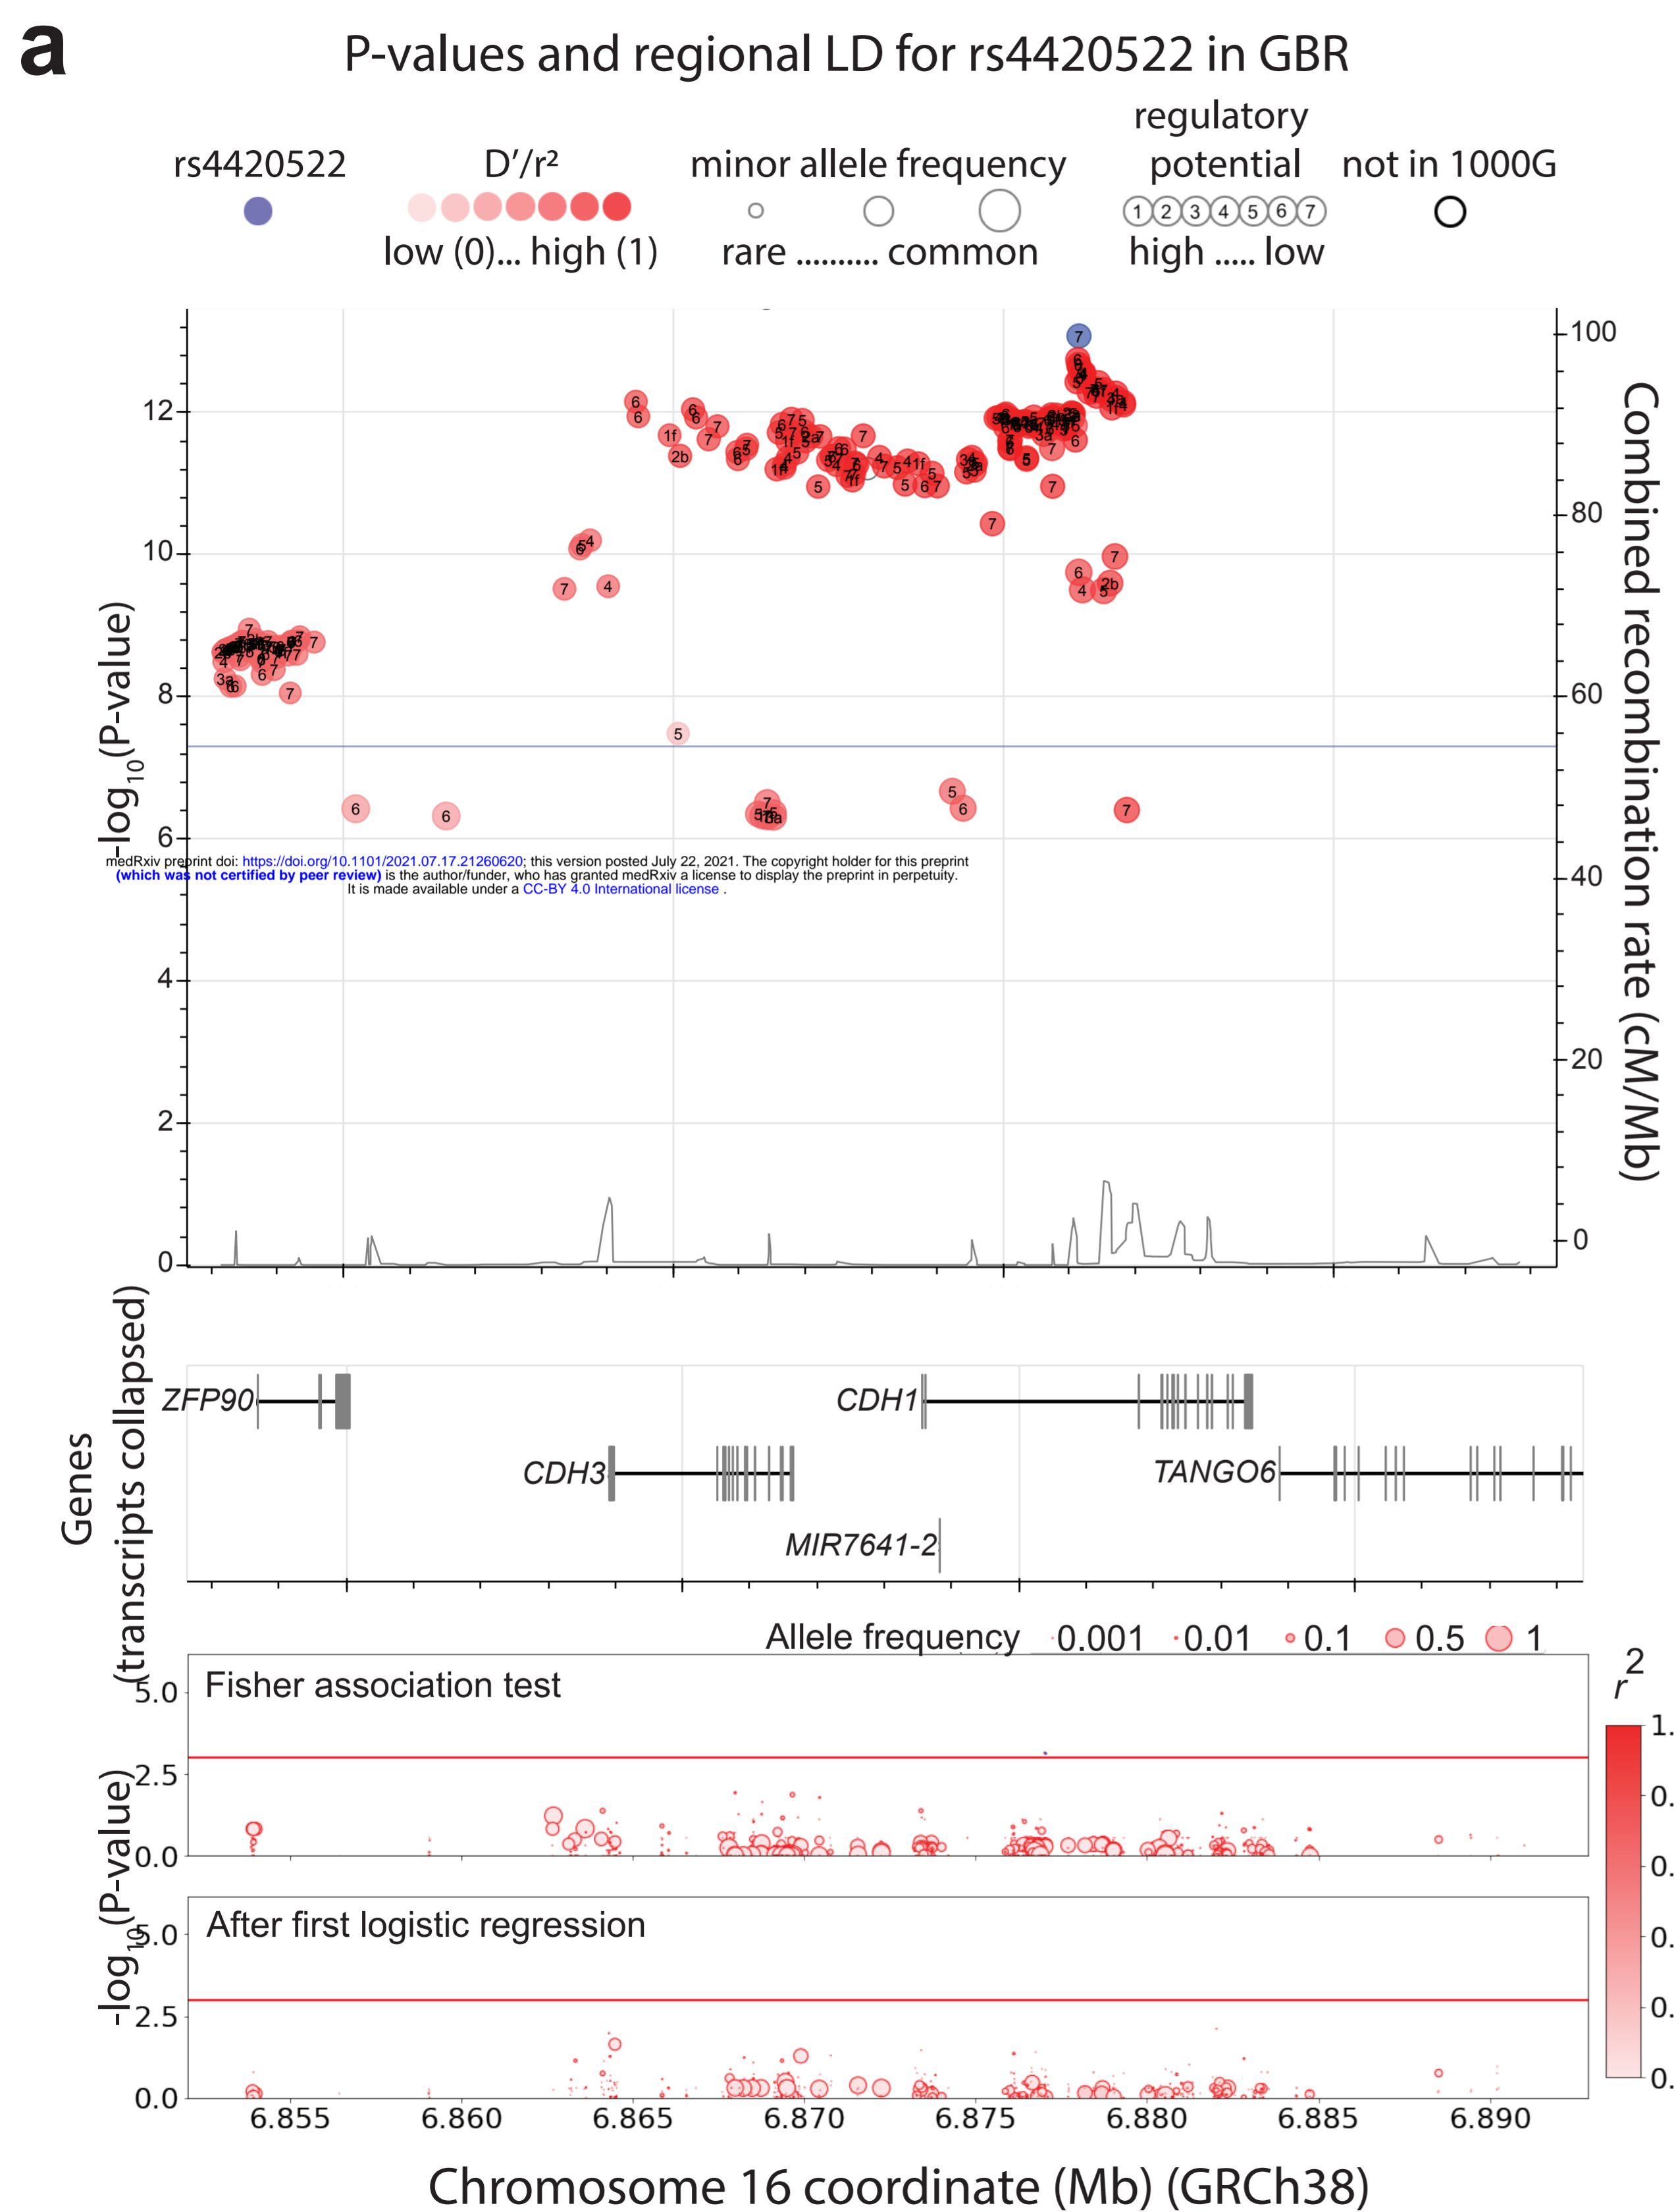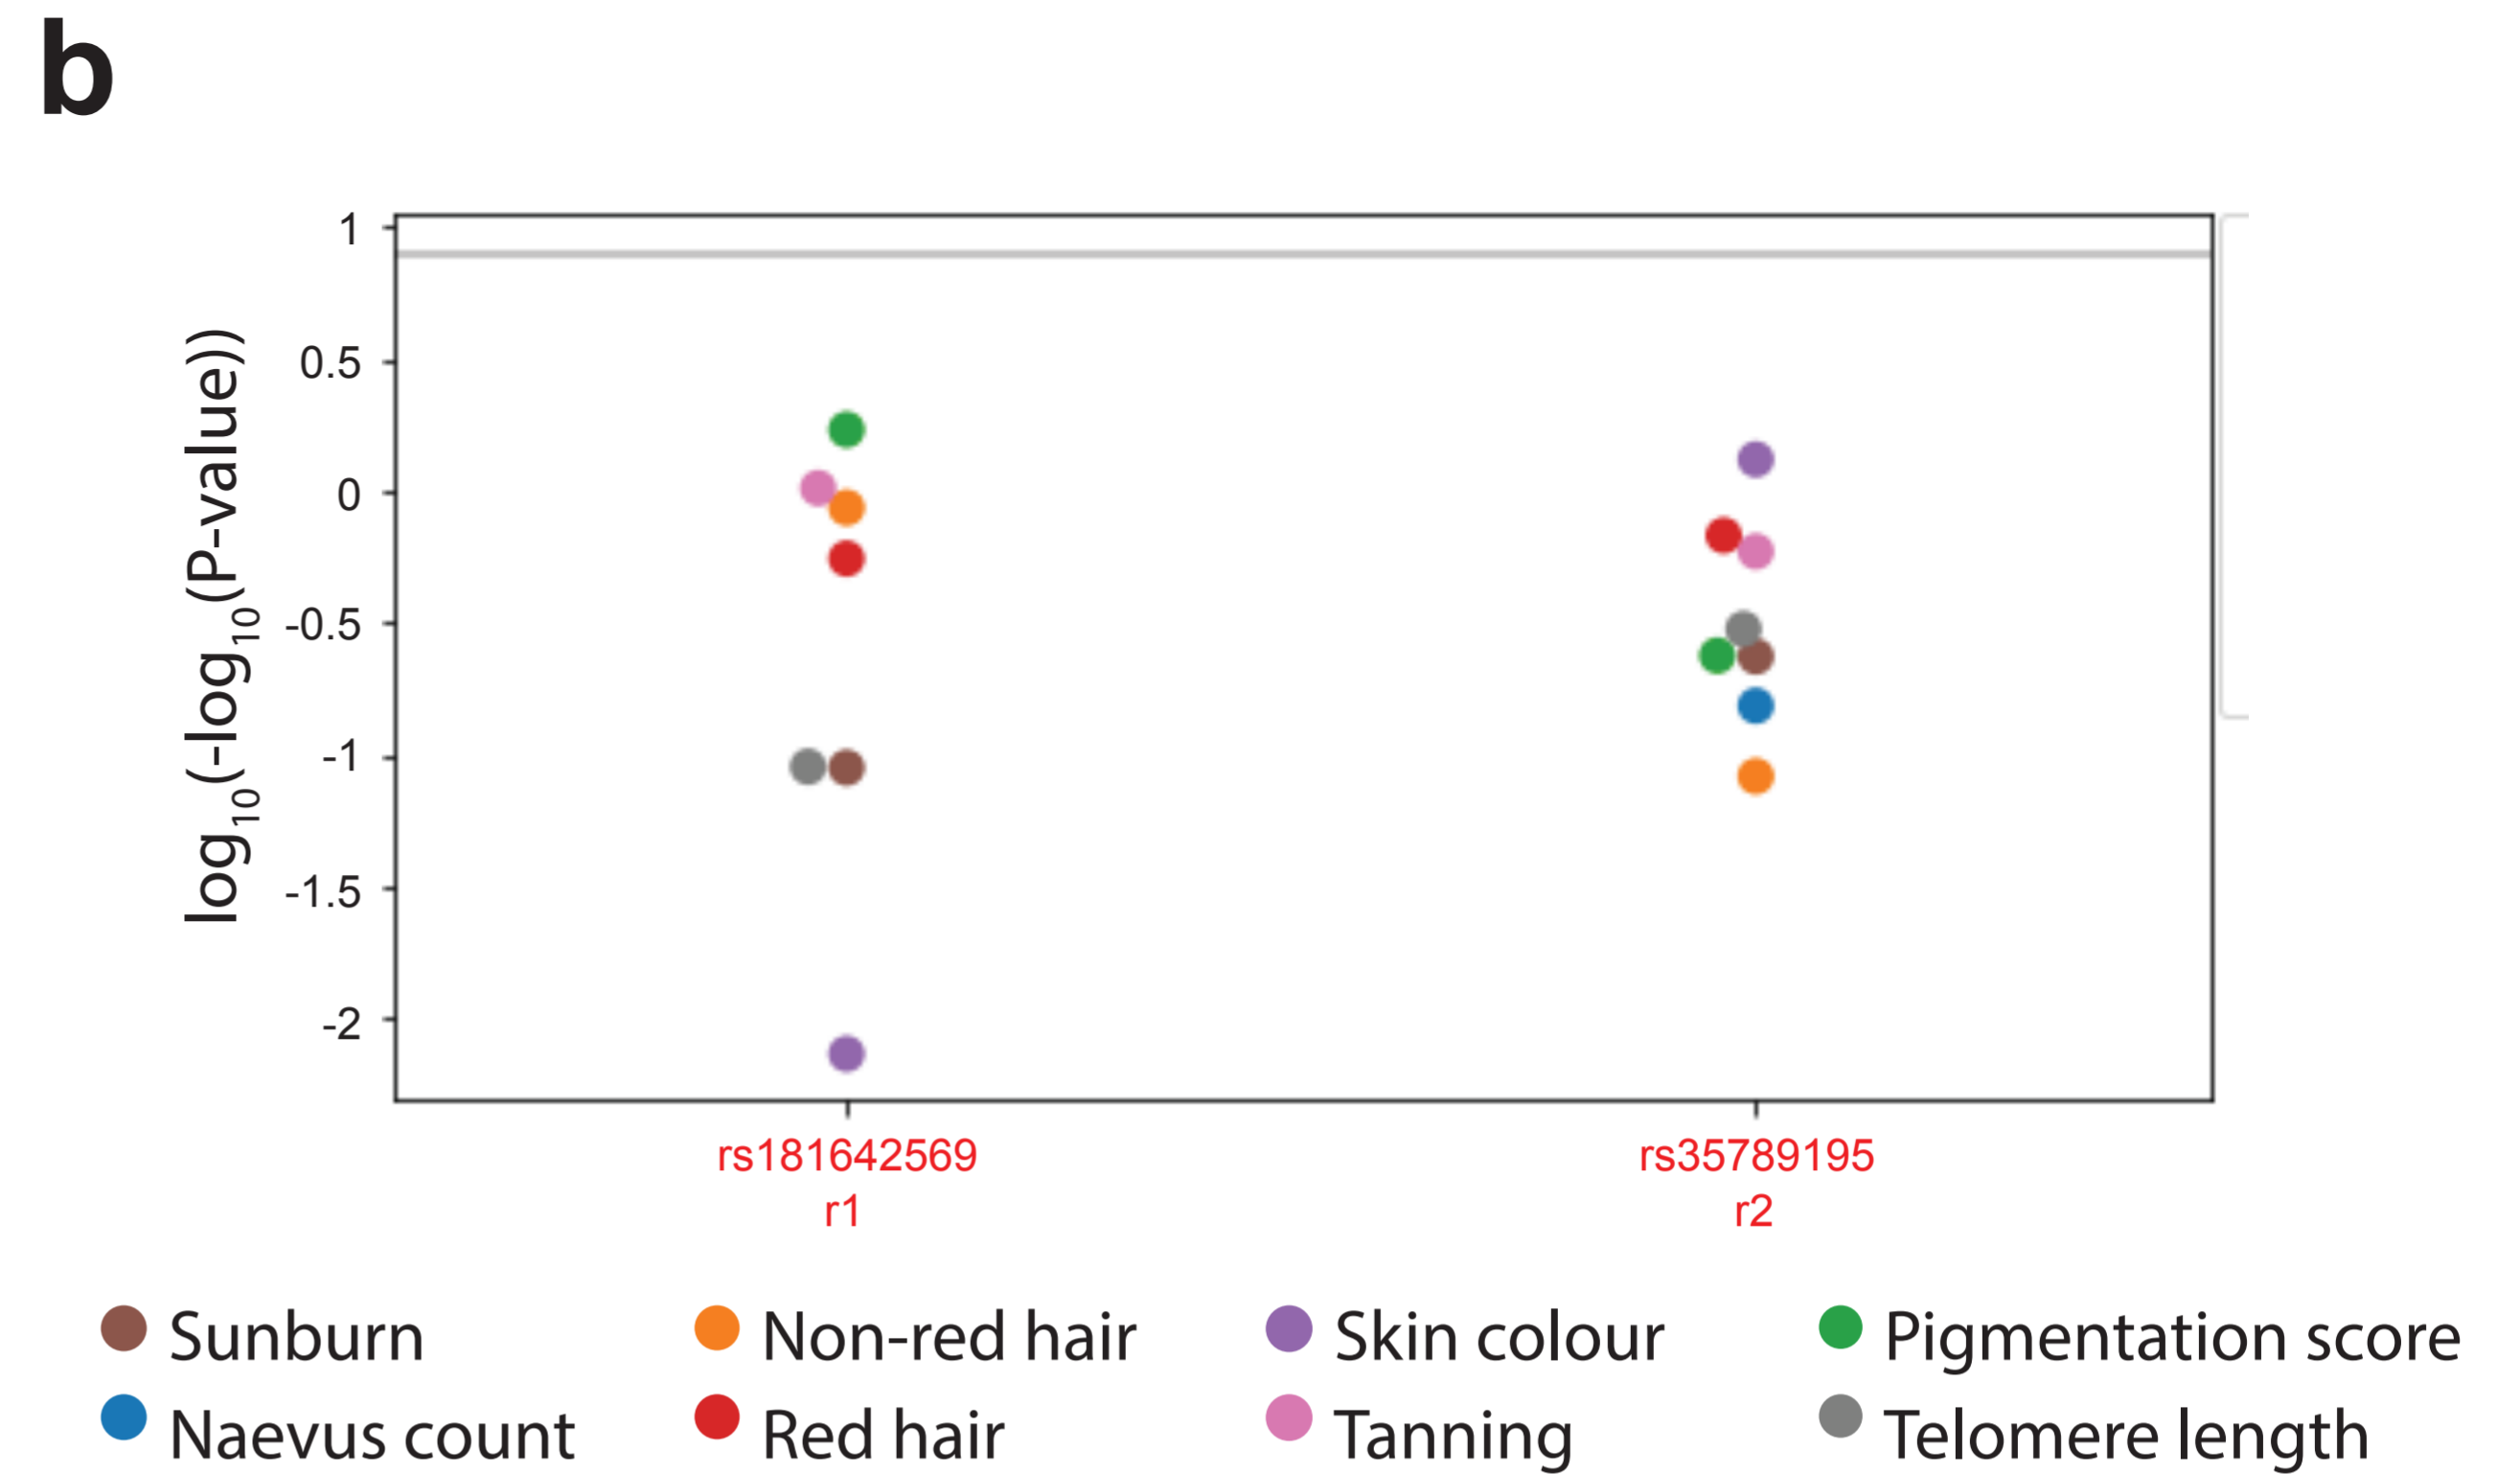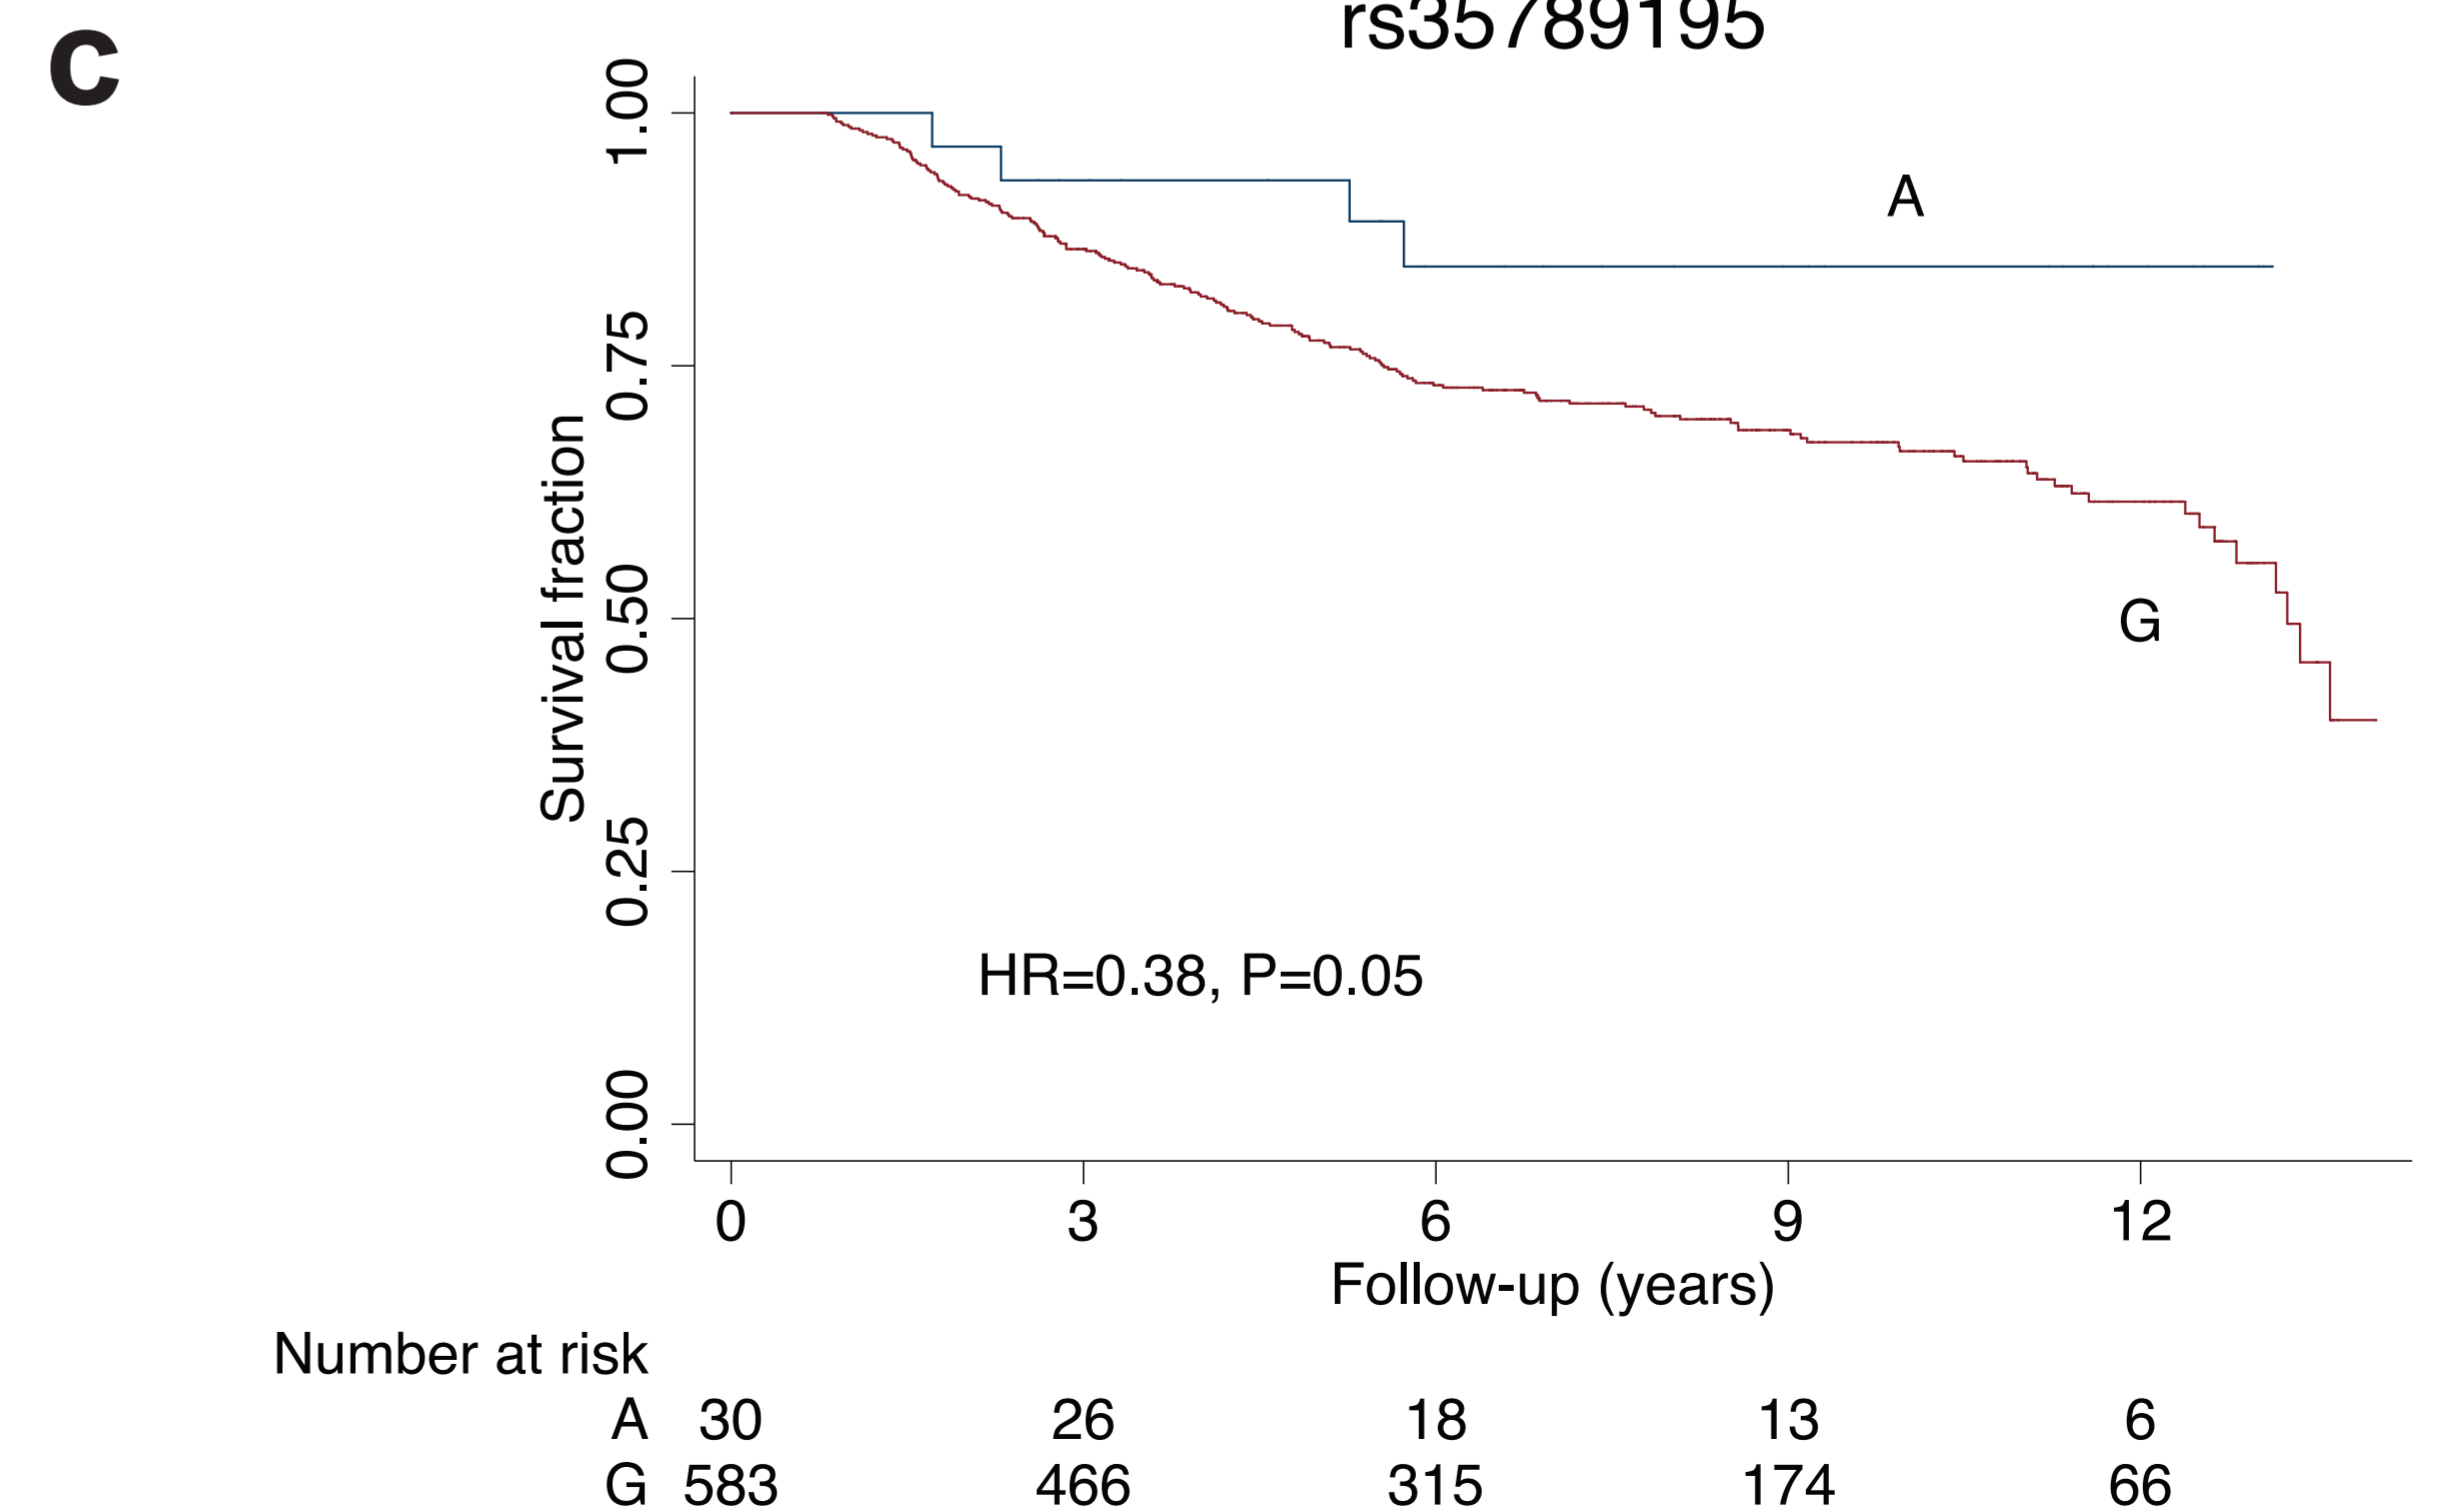

Supplementary Figure 2

**a** P-values and regional LD for rs4354713 in GBR

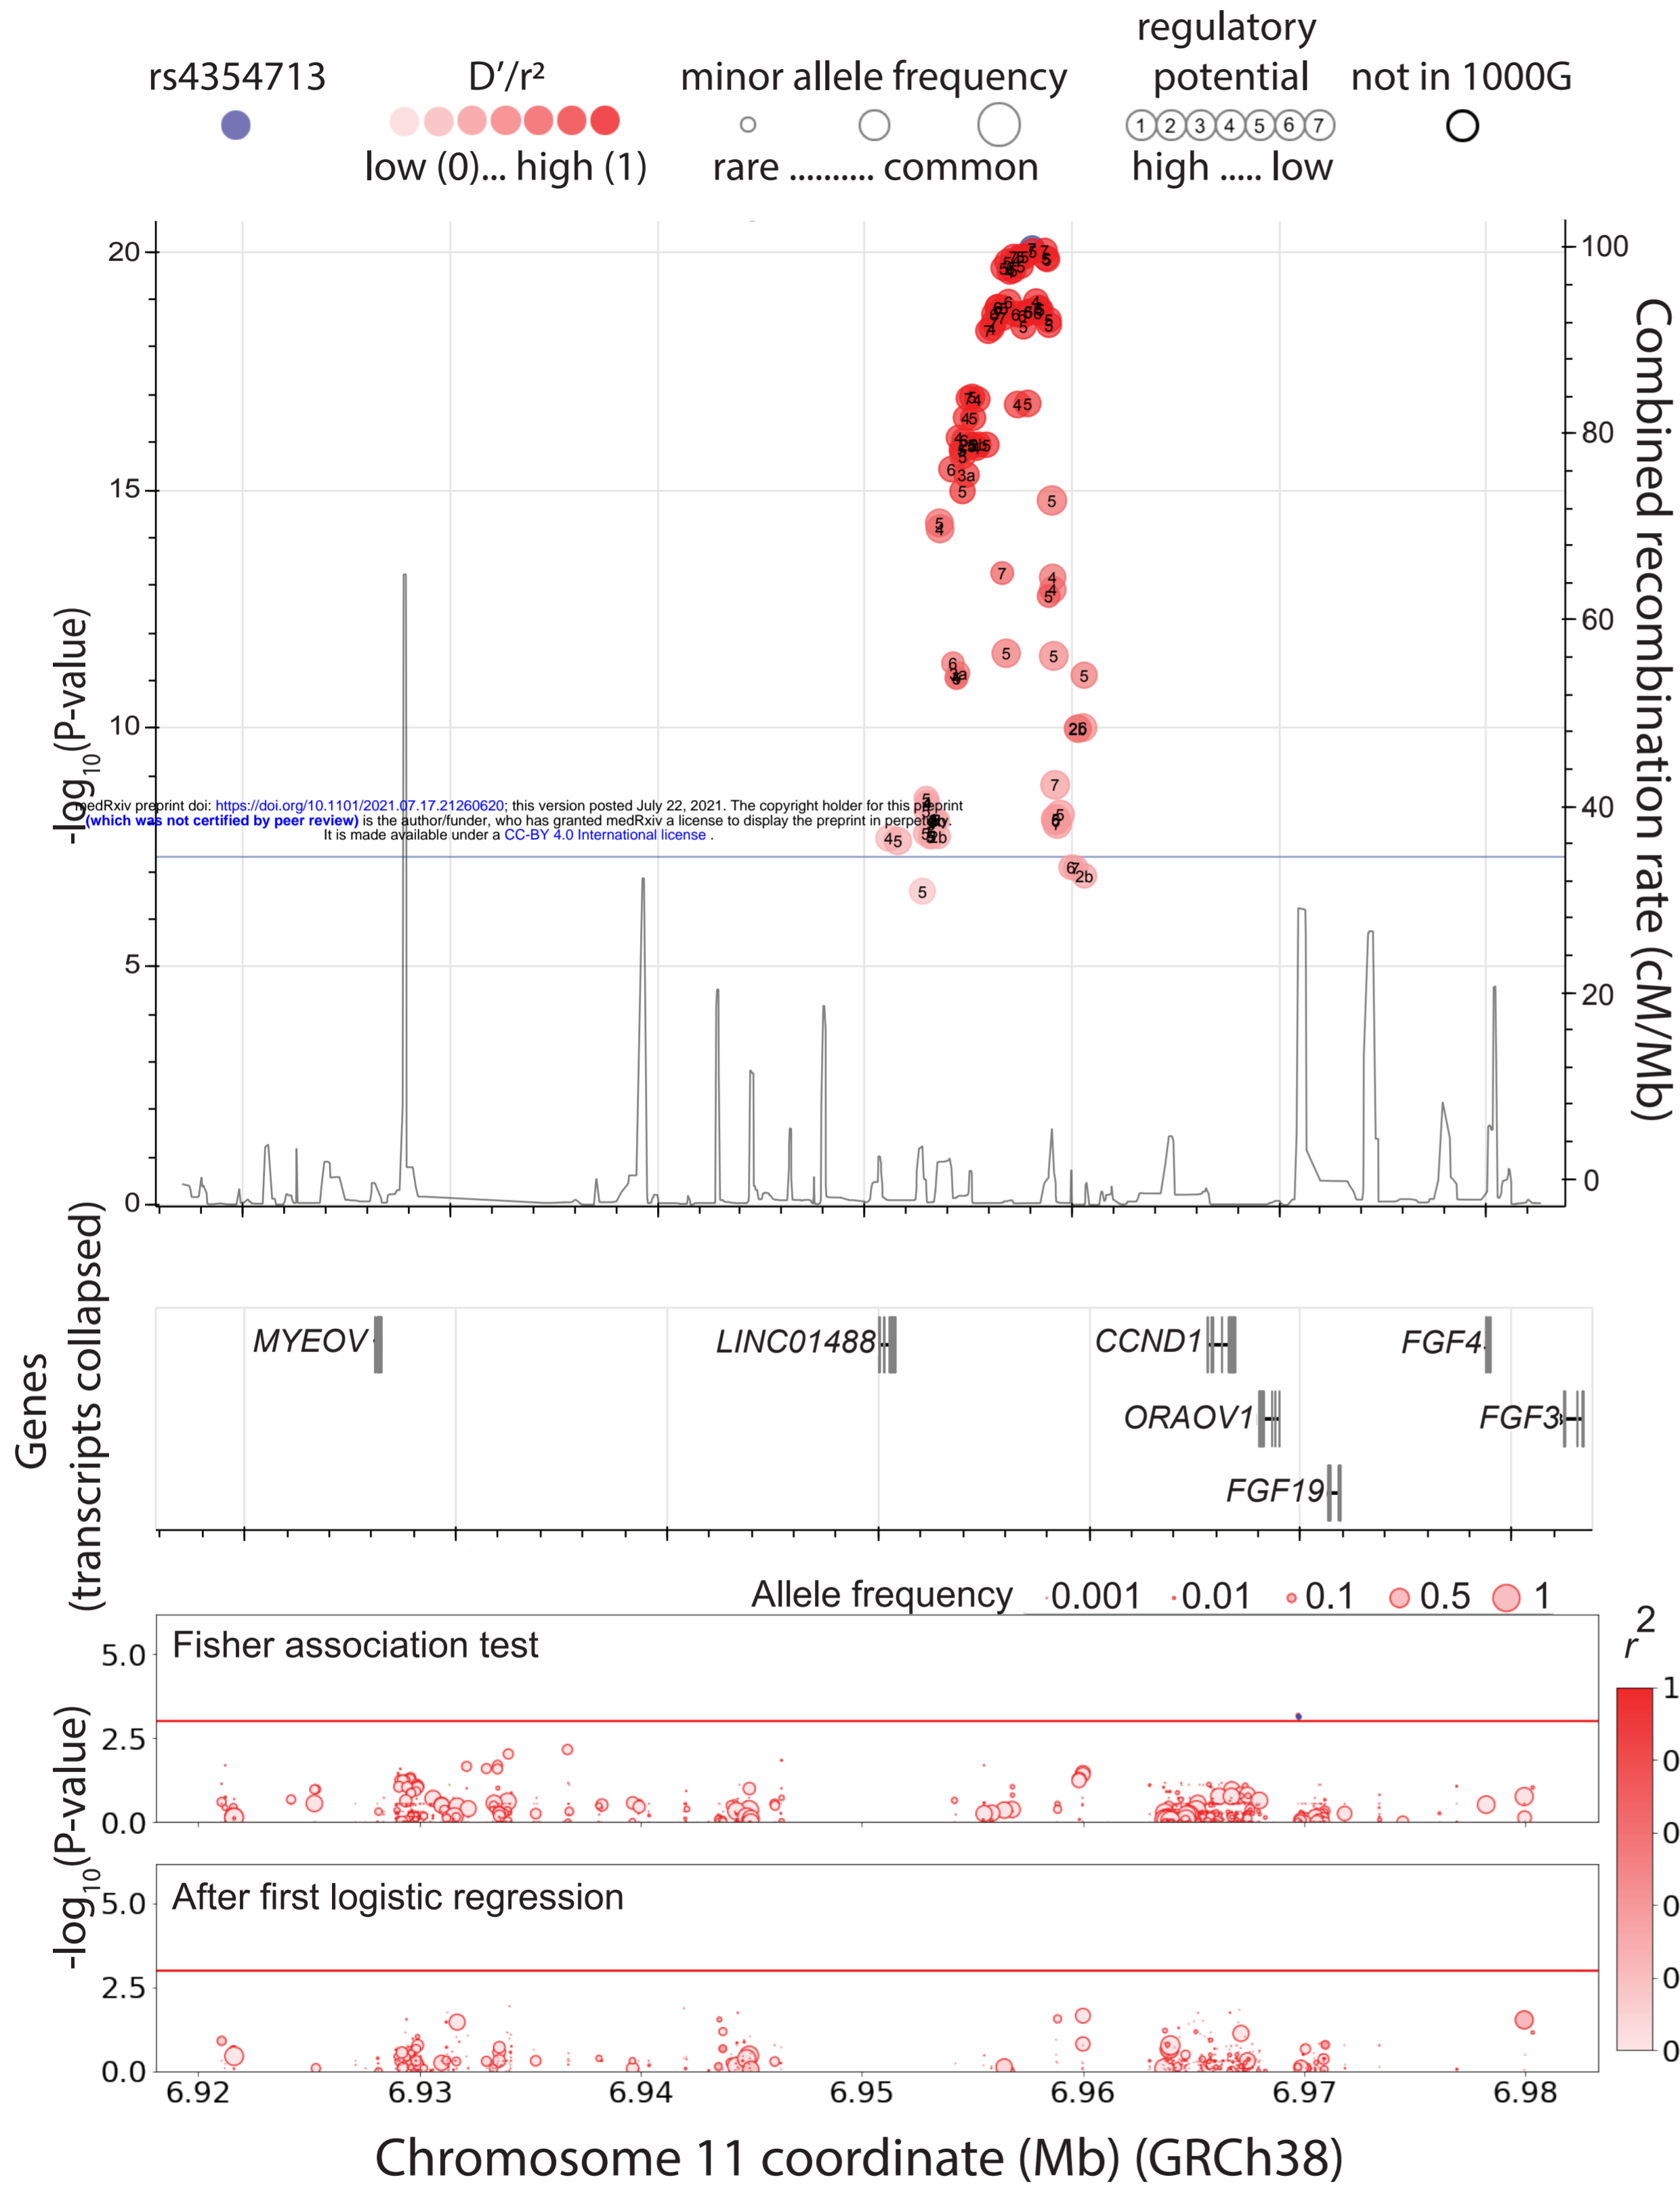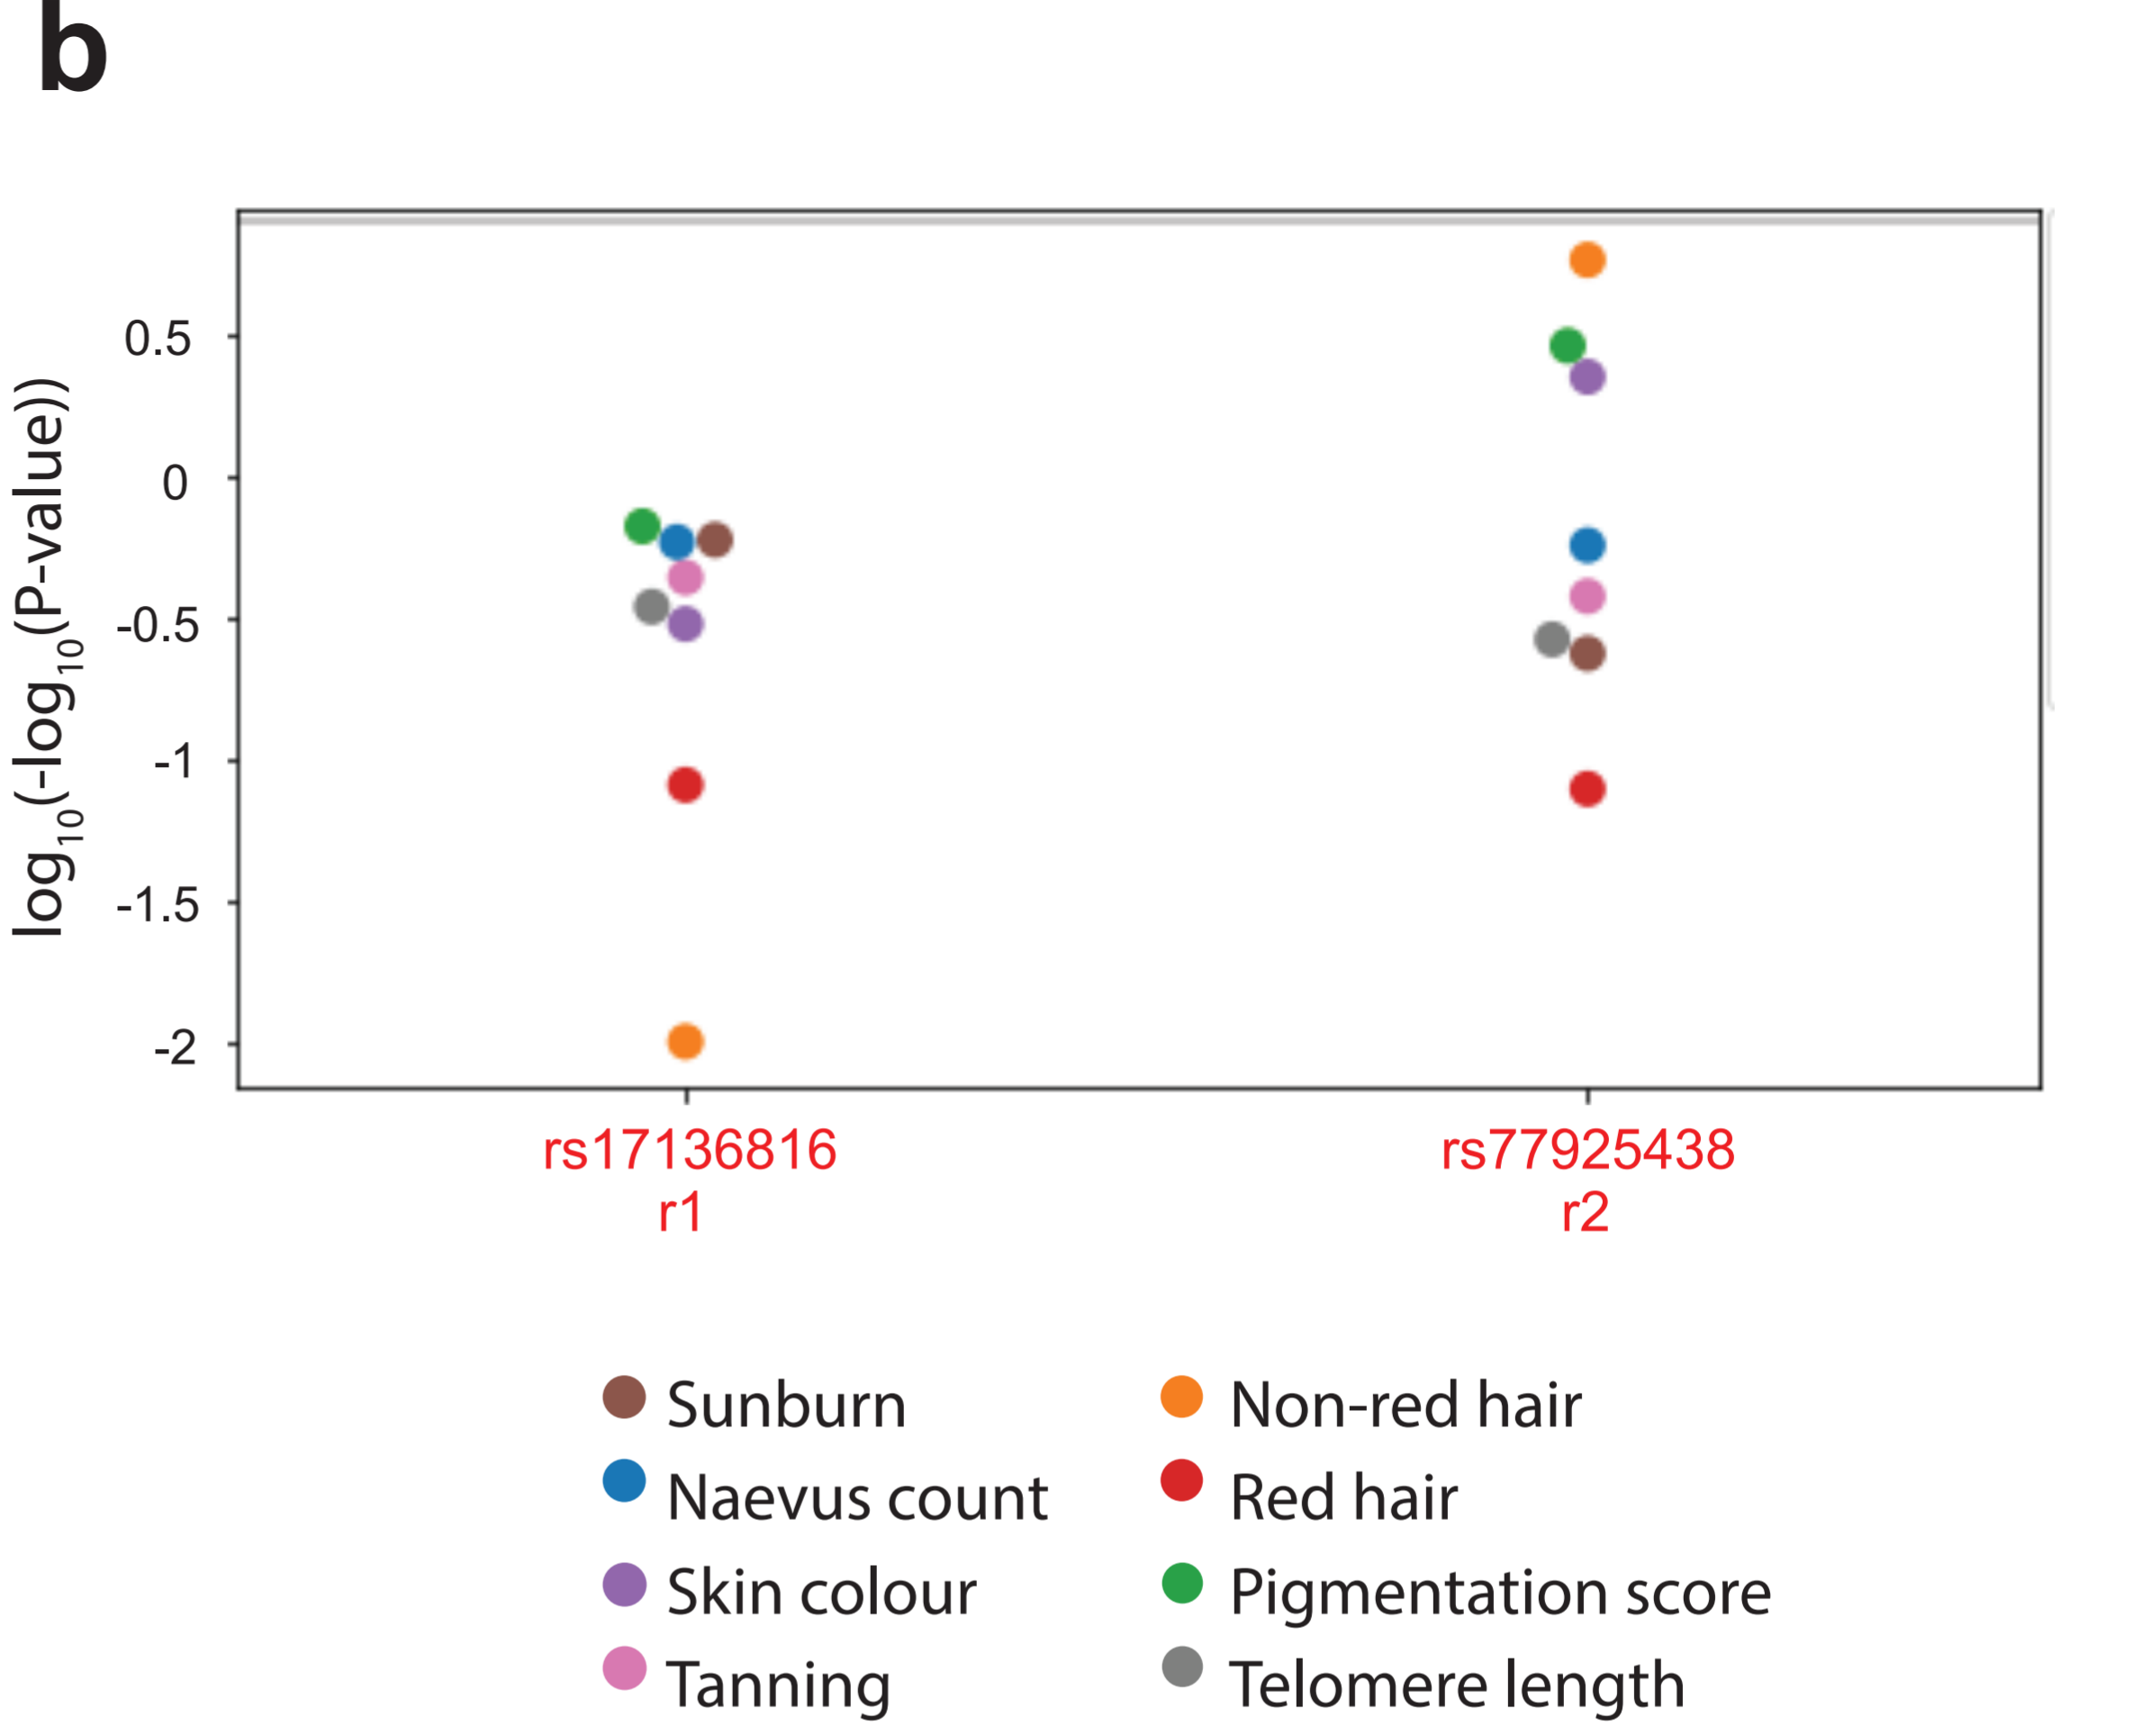

Supplementary Figure 3

# Supplementary Figure 4

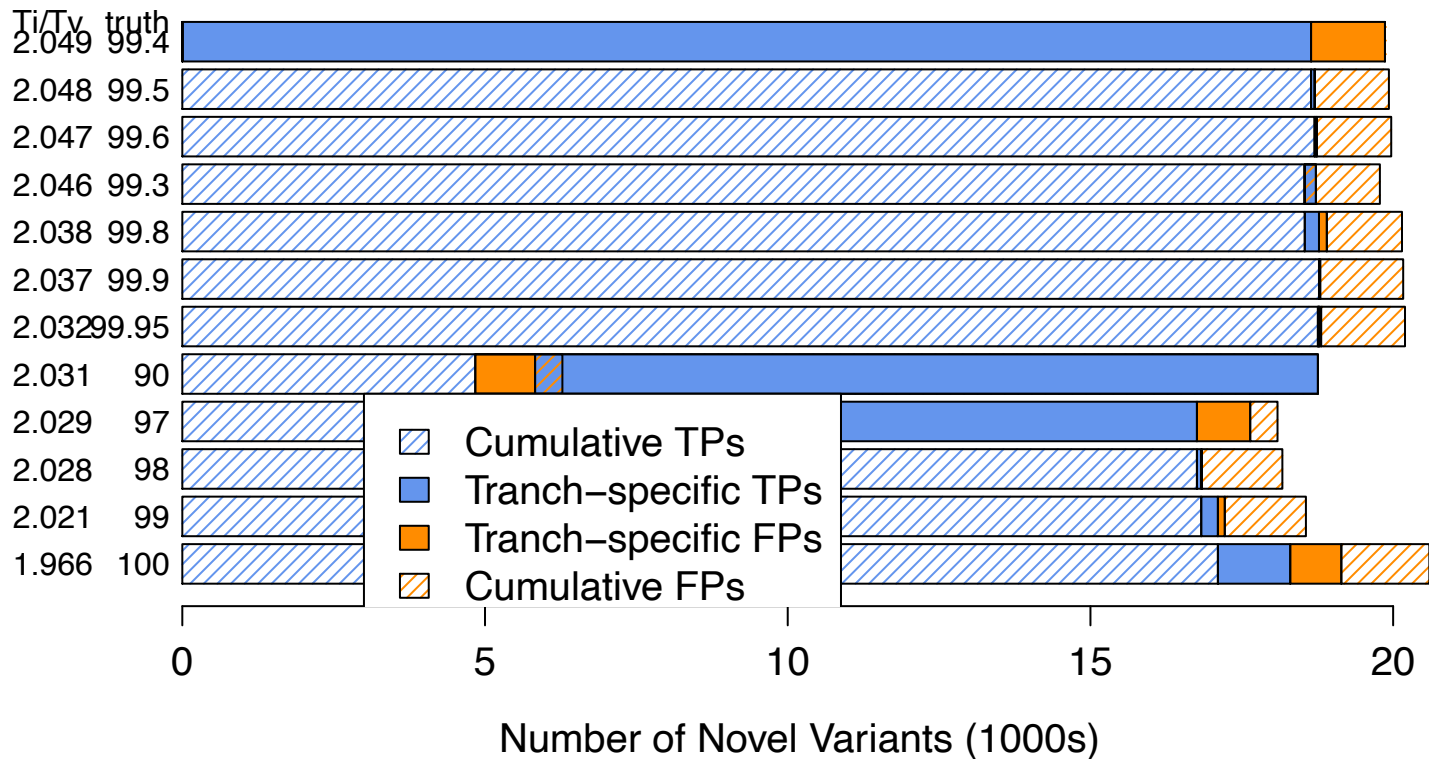



# Supplementary Figure 5

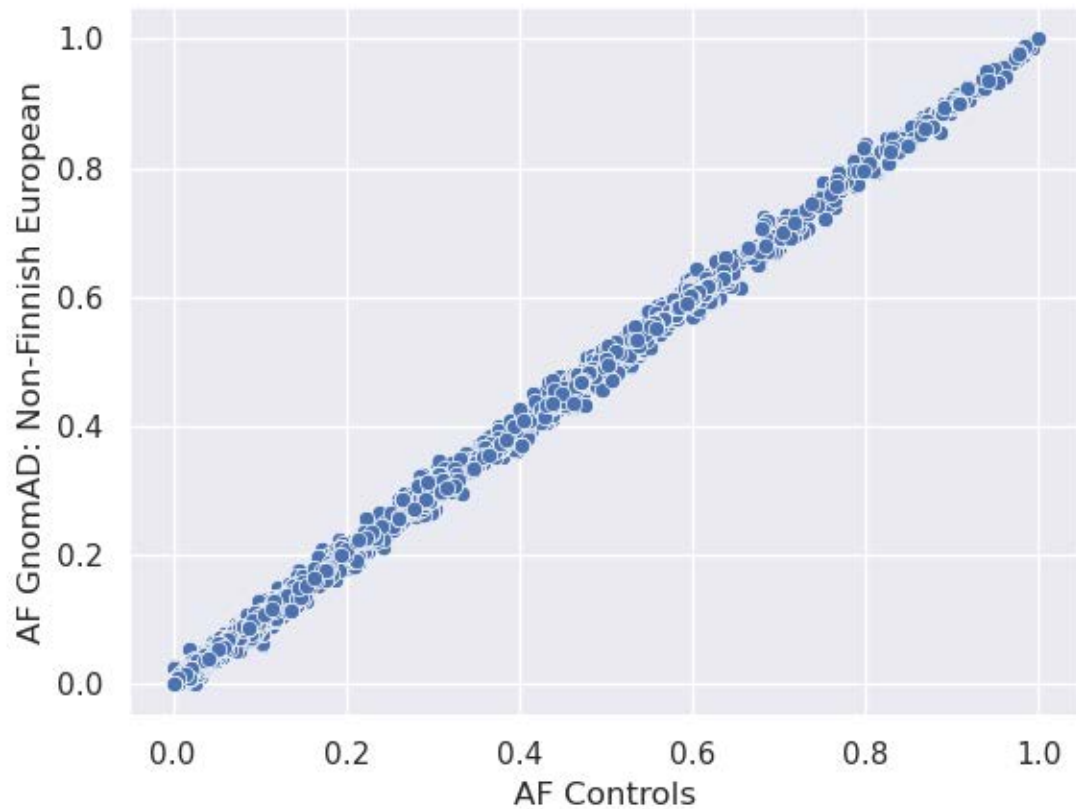

**Supplementary Table 1.** List of variants significantly associated with melanoma in this study. The column 'INFO' includes information about the variant consequences, including gene symbol and Ensembl transcript ID (Ensembl release 99). The 'P-value' column has the Fisher test association value, 'P value 1st' and 'P value 2nd' refer to the P-values after the first and second logistic regressions respectively, controlling for the most associated variant. AF: Allele frequency, OR: Odds ratio. The 'rx' nomenclature in the 'Region' column refers to variants in the same haplotype ('r1' is the highest associated haplotype, 'r2' the second highest, etc)

**MC1R**

| Position       | REF | ALT | INFO [Gene Consequence Feature Transcript AA Position AA Change]  | Base change | AF in cases | AF in controls | P value   | OR    | Consequence | P value 1st | P value 2nd | Region  | Existing_variation      |
|----------------|-----|-----|-------------------------------------------------------------------|-------------|-------------|----------------|-----------|-------|-------------|-------------|-------------|---------|-------------------------|
| chr16:89916599 | A   | T   | FANCA missense_variant Transcript ENST00000389301  6  V/D         | T/A         | 0.1267      | 0.09615        | 0.001673  | 1.364 | V6D         | 0.0001071   | 0.7504      | r2      | rs1800282&COSV66881217  |
| chr16:89927742 | G   | C   | SPIRE2 upstream_gene_variant Transcript ENST00000378247           | C/G         | 0.629       | 0.5749         | 0.0002744 | 1.253 |             | 0.1083      |             | r1      | rs1108064               |
| chr16:89911337 | C   | T   | TCF25 3_prime_UTR_variant Transcript ENST00000263346  ,MC1R up    | T/C         | 0.1173      | 0.08289        | 0.0002038 | 1.471 |             | 5.06E-06    | 0.7227      | r2      | rs11538871&COSV54528897 |
| chr16:89919709 | C   | T   | TUBB3 upstream_gene_variant Transcript ENST00000315491  ,MC1R T/C | T/C         | 0.1649      | 0.09416        | 7.12E-12  | 1.899 | R151C       |             |             | r1 lead | rs1800507               |
| chr16:89919736 | C   | T   | TUBB3 upstream_gene_variant Transcript ENST00000315491  ,MC1R T/C | T/C         | 0.1191      | 0.08355        | 0.0001255 | 1.483 | R160W       | 3.39E-06    |             | r2 lead | rs1805008               |
| chr16:89920138 | G   | C   | TUBB3 upstream_gene_variant Transcript ENST00000315491  ,MC1R C/G | C/G         | 0.03364     | 0.01724        | 0.00111   | 1.984 | D294H       | 0.0004559   | 0.0002301   | r3 lead | rs1805009               |
| chr16:89924435 | C   | T   | TUBB3 intron_variant Transcript ENST00000315491  ,MC1R downstre   | T/C         | 0.1143      | 0.08289        | 0.0006684 | 1.428 |             | 2.04E-05    | 0.1473      | r2      | rs74415461              |
| chr16:89942655 | T   | C   | variant in other transcript                                       | C/T         | 0.1356      | 0.1028         | 0.001035  | 1.369 |             | 2.63E-05    | 0.9895      | r2      | rs74465604              |
| chr16:89958562 | C   | G   | DEF8 intron_variant Transcript ENST00000268676                    | G/C         | 0.1619      | 0.09615        | 1.93E-10  | 1.815 |             | 0.2501      |             | r1      | rs74800773              |
| chr16:89981987 | C   | T   | variant in other transcript                                       | T/C         | 0.1472      | 0.08554        | 4.56E-10  | 1.845 |             | 0.7916      |             | r1      | rs45610233              |
| chr16:89996112 | G   | C   | AFG3L1P upstream_gene_variant Transcript ENST00000454997          | C/G         | 0.1553      | 0.08886        | 4.44E-11  | 1.885 |             | 0.3282      |             | r1      | rs73283859              |

**TYR**

| Position       | REF | ALT | INFO                                                     | Base change | AF in cases | AF in controls | P value   | OR     | Consequence | P value 1st | P value 2nd | Region  | Existing_variation |
|----------------|-----|-----|----------------------------------------------------------|-------------|-------------|----------------|-----------|--------|-------------|-------------|-------------|---------|--------------------|
| chr11:89097935 | G   | A   | intergenic variant                                       | A/G         | 0.3728      | 0.3236         | 0.0007349 | 1.242  |             | 0.3562      |             | r1      | rs11018471         |
| chr11:89168402 | G   | A   | intergenic variant                                       | A/G         | 0.4904      | 0.5438         | 0.0004448 | 0.8074 |             | 0.8291      |             | r1      | rs11018519         |
| chr11:89173224 | C   | G   | TYR upstream_gene_variant Transcript ENST00000263321     | G/C         | 0.3612      | 0.3044         | 7.88E-05  | 1.292  |             | 0.2412      |             | r1      | rs7949856          |
| chr11:89173994 | G   | A   | TYR upstream_gene_variant Transcript ENST00000263321     | A/G         | 0.5549      | 0.6074         | 0.0004916 | 0.8057 |             | 0.69        |             | r1      | rs7949891          |
| chr11:89174125 | A   | C   | TYR upstream_gene_variant Transcript ENST00000263321     | C/A         | 0.3467      | 0.2876         | 3.70E-05  | 1.315  |             | 0.5449      |             | r1      | rs35537664         |
| chr11:89174828 | G   | A   | TYR upstream_gene_variant Transcript ENST00000263321     | A/G         | 0.3609      | 0.3044         | 8.97E-05  | 1.291  |             | 0.229       |             | r1      | rs7925404          |
| chr11:89177421 | G   | C   | TYR upstream_gene_variant Transcript ENST00000263321     | C/G         | 0.4358      | 0.3753         | 5.13E-05  | 1.285  |             | 0.9416      |             | r1      | rs5021654          |
| chr11:89177653 | C   | T   | TYR upstream_gene_variant Transcript ENST00000263321     | T/C         | 0.436       | 0.3753         | 5.12E-05  | 1.287  |             | 0.9636      |             | r1      | rs4547091&CR128149 |
| chr11:89182872 | GA  | G   | TYR intron_variant Transcript ENST00000263321            | G/GA        | 0.4363      | 0.3747         | 3.93E-05  | 1.292  |             | 0.9732      |             | r1      | rs34295137         |
| chr11:89244196 | G   | A   | TYR intron_variant Transcript ENST00000263321            | A/G         | 0.3488      | 0.2779         | 5.84E-07  | 1.392  |             | 0.864       |             | r1      | rs10501698         |
| chr11:89281187 | T   | C   | TYR intron_variant Transcript ENST00000263321            | C/T         | 0.4274      | 0.3534         | 5.97E-07  | 1.365  |             | 0.6351      |             | r1      | rs12273884         |
| chr11:89284793 | G   | A   | TYR missense_variant Transcript ENST00000263321  402 R/Q | A/G         | 0.3407      | 0.2599         | 8.53E-09  | 1.471  | R402Q       |             |             | r1 lead | rs1126809          |
| chr11:89295801 | C   | T   | TYR downstream_gene_variant Transcript ENST00000263321   | T/C         | 0.5025      | 0.4337         | 5.51E-06  | 1.319  |             | 0.4194      |             | r1      | rs28521275         |
| chr11:89309715 | A   | C   | intergenic variant                                       | C/A         | 0.4014      | 0.3282         | 6.08E-07  | 1.372  |             | 0.5869      |             | r1      | rs11018567         |
| chr11:89324933 | T   | C   | NOX4 3_prime_UTR_variant Transcript ENST00000263317      | C/T         | 0.3569      | 0.2838         | 2.92E-07  | 1.4    |             | 0.9522      |             | r1      | rs11018578         |
| chr11:89339242 | T   | A   | NOX4 intron_variant Transcript ENST00000263317           | A/T         | 0.4684      | 0.4164         | 0.0005917 | 1.235  |             | 0.3852      |             | r1      | rs317180           |
| chr11:89490448 | C   | G   | NOX4 intron_variant Transcript ENST00000263317           | G/C         | 0.9456      | 0.9602         | 0.02683   | 0.7206 |             | 0.009909    |             | r2 lead | rs490934           |

**MTAP**

| Position      | REF | ALT    | INFO                                                  | Base change | AF in cases | AF in controls | P value   | OR     | Consequence | P value 1st | P value 2nd | Region  | Existing_variation |
|---------------|-----|--------|-------------------------------------------------------|-------------|-------------|----------------|-----------|--------|-------------|-------------|-------------|---------|--------------------|
| chr9:21738438 | C   | G      | intergenic variant                                    | G/C         | 0.4803      | 0.5305         | 0.0009605 | 0.8177 |             | 0.598       |             | r1      | rs10811604         |
| chr9:21741198 | C   | T      | intergenic variant                                    | T/C         | 0.4815      | 0.5318         | 0.0009666 | 0.8176 |             | 0.591       |             | r1      | rs9644821          |
| chr9:21741986 | C   | T      | intergenic variant                                    | T/C         | 0.4838      | 0.5338         | 0.0009703 | 0.8185 |             | 0.6173      |             | r1      | rs1556696          |
| chr9:21741994 | A   | C      | intergenic variant                                    | C/A         | 0.4838      | 0.5345         | 0.0008681 | 0.8163 |             | 0.5687      |             | r1      | rs1556697          |
| chr9:21747421 | C   | T      | intergenic variant                                    | T/C         | 0.4843      | 0.5345         | 0.000968  | 0.818  |             | 0.6082      |             | r1      | rs1372059          |
| chr9:21772038 | G   | A      | intergenic variant                                    | A/G         | 0.4831      | 0.5332         | 0.0009686 | 0.8182 |             | 0.6218      |             | r1      | rs7037577          |
| chr9:21773223 | A   | G      | intergenic variant                                    | G/A         | 0.4831      | 0.5332         | 0.0009686 | 0.8182 |             | 0.6191      |             | r1      | rs2184551          |
| chr9:21775062 | A   | G      | intergenic variant                                    | G/A         | 0.4833      | 0.5338         | 0.0008699 | 0.8169 |             | 0.588       |             | r1      | rs10757254         |
| chr9:21775958 | G   | A      | intergenic variant                                    | A/G         | 0.4831      | 0.5332         | 0.0009686 | 0.8182 |             | 0.6154      |             | r1      | rs7021012          |
| chr9:21776632 | G   | A      | intergenic variant                                    | A/G         | 0.4825      | 0.5325         | 0.0009714 | 0.8187 |             | 0.6221      |             | r1      | rs10757255         |
| chr9:21780252 | G   | A      | intergenic variant                                    | G/A         | 0.4856      | 0.5365         | 0.0007812 | 0.8156 |             | 0.5549      |             | r1      | rs7846749          |
| chr9:21783923 | A   | A      | intergenic variant                                    | A/G         | 0.4871      | 0.5378         | 0.000868  | 0.8162 |             | 0.5624      |             | r1      | rs935053           |
| chr9:21785305 | C   | G      | intergenic variant                                    | G/C         | 0.4866      | 0.5378         | 0.0007779 | 0.8146 |             | 0.5309      |             | r1      | rs1345022          |
| chr9:21787403 | G   | C      | intergenic variant                                    | C/G         | 0.4866      | 0.5378         | 0.0007779 | 0.8146 |             | 0.5282      |             | r1      | rs7018772          |
| chr9:21788082 | T   | G      | intergenic variant                                    | G/T         | 0.4871      | 0.5385         | 0.0006996 | 0.814  |             | 0.5196      |             | r1      | rs7038708          |
| chr9:21788524 | A   | G      | intergenic variant                                    | G/A         | 0.4861      | 0.5371         | 0.0007791 | 0.8151 |             | 0.5313      |             | r1      | rs7022856          |
| chr9:21790068 | A   | G      | intergenic variant                                    | G/A         | 0.4858      | 0.5378         | 0.0006246 | 0.8121 |             | 0.4823      |             | r1      | rs10811617         |
| chr9:21790143 | G   | C      | intergenic variant                                    | C/G         | 0.4858      | 0.5378         | 0.0006246 | 0.8121 |             | 0.4798      |             | r1      | rs10811618         |
| chr9:21790670 | C   | G      | intergenic variant                                    | G/C         | 0.4856      | 0.5358         | 0.0009674 | 0.8178 |             | 0.5849      |             | r1      | rs1542075          |
| chr9:21790756 | A   | T      | intergenic variant                                    | T/A         | 0.4727      | 0.5252         | 0.0005556 | 0.8104 |             | 0.5296      |             | r1      | rs1542076          |
| chr9:21799599 | T   | C      | MTAP upstream_gene_variant Transcript ENST00000580900 | C/T         | 0.4901      | 0.5424         | 0.0005593 | 0.8109 |             | 0.4798      |             | r1      | rs7033503          |
| chr9:21801531 | A   | G      | MTAP upstream_gene_variant Transcript ENST00000580900 | G/A         | 0.4176      | 0.4682         | 0.0007756 | 0.8144 |             | 0.8179      |             | r1      | rs4364717          |
| chr9:21803184 | G   | C      | MTAP intron_variant Transcript ENST00000580900        | C/G         | 0.4767      | 0.5318         | 0.0002803 | 0.802  |             | 0.405       |             | r1      | rs935055           |
| chr9:21803730 | T   | TCCTAA | MTAP intron_variant Transcript ENST00000580900        | TCCTAA/T    | 0.4765      | 0.5318         | 0.0002793 | 0.8012 |             | 0.3947      |             | r1      | rs98654170         |
| chr9:21803881 | C   | A      | MTAP intron_variant Transcript ENST00000580900        | A/C         | 0.4765      | 0.5318         | 0.0002793 | 0.8012 |             | 0.3947      |             | r1      | rs871024           |
| chr9:21804618 | A   | G      | MTAP intron_variant Transcript ENST00000580900        | G/A         | 0.4765      | 0.5312         | 0.0003147 | 0.8033 |             | 0.4331      |             | r1      | rs869330           |
| chr9:21804694 | A   | G      | MTAP intron_variant Transcript ENST00000580900        | G/A         | 0.4765      | 0.5318         | 0.0002793 | 0.8012 |             | 0.3947      |             | r1      | rs869329           |
| chr9:21805209 | C   | CAG    | MTAP intron_variant Transcript ENST00000580900        | CAG/C       | 0.4765      | 0.5318         | 0.0002793 | 0.8012 |             | 0.3947      |             | r1      | rs80138396         |
| chr9:21811155 | A   | G      | MTAP intron_variant Transcript ENST00000580900        | G/A         | 0.4069      | 0.4682         | 4.62E-05  | 0.7794 |             |             |             | r1 lead | rs10811623         |
| chr9:21813242 | T   | C      | MTAP intron_variant Transcript ENST00000580900        | C/T         | 0.4901      | 0.4304         | 8.10E-05  | 1.272  |             | 0.242       |             | r1      | rs72691561         |
| chr9:21813304 | A   | C      | MTAP intron_variant Transcript ENST00000580900        | C/A         | 0.4906      | 0.4304         | 7.13E-05  | 1.275  |             | 0.2158      |             | r1      | rs72691562         |

|               |    |   |                                                         |      |        |        |           |        |          |         |                         |
|---------------|----|---|---------------------------------------------------------|------|--------|--------|-----------|--------|----------|---------|-------------------------|
| chr9:21813496 | C  | T | MTAP intron_variant Transcript ENST00000580900          | T/C  | 0.4886 | 0.4297 | 0.0001038 | 1.268  | 0.2805   | r1      | rs72691563              |
| chr9:21813519 | C  | T | MTAP intron_variant Transcript ENST00000580900          | T/C  | 0.4896 | 0.431  | 0.0001047 | 1.266  | 0.3023   | r1      | rs72691564              |
| chr9:21816529 | A  | G | MTAP intron_variant Transcript ENST00000580900          | G/A  | 0.4646 | 0.5259 | 5.58E-05  | 0.7824 | 0.3579   | r1      | rs7023329               |
| chr9:21816574 | G  | A | MTAP intron_variant Transcript ENST00000580900          | A/G  | 0.5073 | 0.569  | 4.86E-05  | 0.7801 | 0.186    | r1      | rs7023680               |
| chr9:21816638 | T  | C | MTAP intron_variant Transcript ENST00000580900          | C/T  | 0.4077 | 0.4668 | 8.80E-05  | 0.7861 | 0.188    | r1      | rs10114559&COSV66477123 |
| chr9:21816759 | G  | A | MTAP missense_variant Transcript ENST00000580900 56 V/I | A/G  | 0.3859 | 0.4363 | 0.0007562 | 0.8119 | 0.2078   | r1      | rs7023954&COSV66477132  |
| chr9:21817755 | A  | G | MTAP intron_variant Transcript ENST00000580900          | G/A  | 0.4851 | 0.5391 | 0.0003965 | 0.8053 | 0.4303   | r1      | rs7027989               |
| chr9:21826539 | G  | A | MTAP intron_variant Transcript ENST00000580900          | A/G  | 0.4831 | 0.5351 | 0.0006236 | 0.8117 | 0.5283   | r1      | rs6475585               |
| chr9:21828243 | T  | C | MTAP intron_variant Transcript ENST00000580900          | C/T  | 0.5215 | 0.5789 | 0.0001477 | 0.7927 | 0.305    | r1      | rs3927738               |
| chr9:21834211 | T  | C | MTAP intron_variant Transcript ENST00000580900          | C/T  | 0.4186 | 0.4728 | 0.0003136 | 0.8027 | 0.4901   | r1      | rs10965153              |
| chr9:21837145 | GT | G | MTAP intron_variant Transcript ENST00000580900          | G/GT | 0.3773 | 0.4304 | 0.0003628 | 0.8021 | 0.7505   | r1      | rs34710113              |
| chr9:21838146 | A  | G | MTAP intron_variant Transcript ENST00000580900          | G/A  | 0.4021 | 0.4536 | 0.0005854 | 0.8103 | 0.6951   | r1      | rs7868783               |
| chr9:21840778 | G  | A | MTAP intron_variant Transcript ENST00000580900          | A/G  | 0.3998 | 0.4516 | 0.0005773 | 0.8091 | 0.6685   | r1      | rs4977733               |
| chr9:21952927 | C  | T | variant in other transcript                             | T/C  | 0.2491 | 0.2885 | 0.0003353 | 0.8183 | 0.003437 | r2 lead | rs2518722               |

### CASP8

| Position       | REF | ALT | INFO                                                             | Base change | AF in cases | AF in controls | P value   | OR     | Consequence | P value 1st | P value 2nd | Region  | Existing_variation      |
|----------------|-----|-----|------------------------------------------------------------------|-------------|-------------|----------------|-----------|--------|-------------|-------------|-------------|---------|-------------------------|
| chr2:201258272 | A   | G   | CASP8 missense_variant Transcript ENST00000358485 14 K/R         | G/A         | 0.6869      | 0.7328         | 0.0009596 | 0.8001 |             | 0.9973      |             | r1      | rs3769823&COSV51848843  |
| chr2:201260274 | T   | C   | CASP8 intron_variant Transcript ENST00000358485                  | C/T         | 0.719       | 0.7639         | 0.0008154 | 0.7908 |             | 0.4022      |             | r1      | rs6754084&COSV51859738  |
| chr2:201261892 | A   | G   | CASP8 intron_variant Transcript ENST00000358485                  | G/A         | 0.7188      | 0.7639         | 0.0007025 | 0.7898 |             | 0.435       |             | r1      | rs1861270&COSV51846764  |
| chr2:201263224 | A   | C   | CASP8 intron_variant Transcript ENST00000358485                  | C/A         | 0.719       | 0.7639         | 0.0008154 | 0.7908 |             | 0.39        |             | r1      | rs6435074               |
| chr2:201265585 | A   | C   | CASP8 intron_variant Transcript ENST00000358485                  | C/A         | 0.719       | 0.7639         | 0.0008154 | 0.7908 |             | 0.39        |             | r1      | rs2349070               |
| chr2:201286440 | A   | G   | CASP8 intron_variant Transcript ENST00000358485 ,FLACC1 downstre | G/A         | 0.7013      | 0.7527         | 0.0001707 | 0.7716 |             |             |             | r1 lead | rs3769818               |
| chr2:201286677 | G   | A   | CASP8 3_prime_UTR_variant Transcript ENST00000358485 ,FLACC1 d   | A/G         | 0.2033      | 0.1631         | 0.0007202 | 1.309  |             | 0.4203      |             | r1      | rs17860428              |
| chr2:201286716 | G   | C   | CASP8 3_prime_UTR_variant Transcript ENST00000358485 ,FLACC1 d   | C/G         | 0.6037      | 0.6552         | 0.0004838 | 0.8019 |             | 0.4867      |             | r1      | rs3185378               |
| chr2:201288502 | C   | A   | CASP8 downstream_gene_variant Transcript ENST00000358485 ,FLAC   | A/C         | 0.7013      | 0.7527         | 0.0001707 | 0.7716 |             | 1           |             | r1      | rs700635                |
| chr2:201349425 | C   | T   | FLACC1 intron_variant Transcript ENST00000405148                 | T/C         | 0.5797      | 0.6286         | 0.00098   | 0.8146 |             | 0.4059      |             | r1      | rs6714736               |
| chr2:201350769 | C   | G   | FLACC1 missense_variant Transcript ENST00000405148 43 V/L        | G/C         | 0.5797      | 0.6286         | 0.00098   | 0.8146 |             | 0.4059      |             | r1      | rs13014235&COSV53786340 |
| chr2:201356718 | T   | A   | FLACC1 intron_variant Transcript ENST00000405148                 | A/T         | 0.5797      | 0.6286         | 0.00098   | 0.8146 |             | 0.4032      |             | r1      | rs6737085               |
| chr2:201384985 | A   | T   | TRAK2 intron_variant Transcript ENST00000332624                  | T/A         | 0.1811      | 0.1412         | 0.0004518 | 1.344  |             | 0.1945      |             | r1      | rs2714486               |
| chr2:201406624 | C   | T   | TRAK2 intron_variant Transcript ENST00000332624 ,SCYL2P1 downstr | T/C         | 0.1813      | 0.1419         | 0.0005313 | 1.339  |             | 0.2147      |             | r1      | rs2540334               |
| chr2:201652788 | G   | C   | MPP4 intron_variant Transcript ENST00000409474                   | C/G         | 0.00253     | 0.008621       | 0.003832  | 0.2917 |             | 0.005472    |             | r2 lead | rs191947901             |

### OCA2

| Position       | REF | ALT | INFO                                                     | Base change | AF in cases | AF in controls | P value   | OR      | Consequence | P value 1st | P value 2nd | Region  | Existing_variation     |
|----------------|-----|-----|----------------------------------------------------------|-------------|-------------|----------------|-----------|---------|-------------|-------------|-------------|---------|------------------------|
| chr15:28107607 | G   | A   | HERC2 downstream_gene_variant Transcript ENST00000261609 | A/G         | 0.03869     | 0.06034        | 0.0007325 | 0.6268  |             | 0.9111      |             | r1      | rs79494067             |
| chr15:28114112 | G   | A   | HERC2 intron_variant Transcript ENST00000261609          | A/G         | 0.958       | 0.9337         | 0.0003166 | 1.621   |             |             |             | r1 lead | rs12593929             |
| chr15:28132626 | C   | T   | HERC2 intron_variant Transcript ENST00000261609          | T/C         | 0.9575      | 0.9337         | 0.000436  | 1.601   |             | 0.9692      |             | r1      | rs8025035&COSV55334004 |
| chr15:28168711 | AAG | A   | HERC2 intron_variant Transcript ENST00000261609          | A/AAG       | 0.0002529   | 0.002653       | 0.02258   | 0.09512 |             | 0.03155     |             | r2 lead | -                      |

### CDH1

| Position       | REF | ALT | INFO                                           | Base change | AF in cases | AF in controls | P value   | OR     | Consequence | P value 1st | P value 2nd | Region  | Existing_variation |
|----------------|-----|-----|------------------------------------------------|-------------|-------------|----------------|-----------|--------|-------------|-------------|-------------|---------|--------------------|
| chr16:68696612 | G   | A   | CDH1 intron_variant Transcript ENST00000264012 | A/G         | 0.02479     | 0.0378         | 0.01352   | 0.647  |             | 0.007683    |             | r2 lead | rs35789195         |
| chr16:68770202 | T   | C   | CDH1 intron_variant Transcript ENST00000261769 | C/T         | 0.001265    | 0.007294       | 0.0007144 | 0.1723 |             |             |             | r1 lead | rs181642569        |

### CCND1

| Position       | REF | ALT | INFO                                                     | Base change | AF in cases | AF in controls | P value   | OR     | Consequence | P value 1st | P value 2nd | Region  | Existing_variation |
|----------------|-----|-----|----------------------------------------------------------|-------------|-------------|----------------|-----------|--------|-------------|-------------|-------------|---------|--------------------|
| chr11:69366942 | T   | C   | variant in other transcript                              | C/T         | 0.1449      | 0.1166         | 0.006827  | 1.284  |             | 0.01142     |             | r2 lead | rs77925438         |
| chr11:69697346 | T   | C   | FGF19 downstream_gene_variant Transcript ENST00000294312 | C/T         | 0.02049     | 0.03714        | 0.0006689 | 0.5423 |             |             |             | r1 lead | rs17136816         |

Supplementary Table 2. Association between associated SNPs and melanoma-linked traits. \*REF\* refers to reference allele, \*ALT\* is alternative allele. OR: Odds ratio, SE: Standard error, P: P-value, BETA: Beta coefficient, Sunburn: sunburn history, Skin: skin colour, tanning: Tanning ability, pigscore: pigmentation score, TEL: Telomere length, NAEV: naevus count.

| POS      | CHR | ID          | SNP2         | sunburn_REF | sunburn_ALT | sunburn_sunburn | sunburn_sunburn | sunburn_sunburn | redhair_REF | redhair_ALT | redhair_sunburn | skin_BETA  | skin_SE    | skin_P       | nonredhair_REF | nonredhair_ALT | nonredhair_sunburn | tanning_REF | tanning_ALT | tanning_sunburn | pigscore_REF | pigscore_ALT | pigscore_sunburn | TEL_REF  | BETA_NAEV | SE_NAEV  | P_NAEV     |          |    |
|----------|-----|-------------|--------------|-------------|-------------|-----------------|-----------------|-----------------|-------------|-------------|-----------------|------------|------------|--------------|----------------|----------------|--------------------|-------------|-------------|-----------------|--------------|--------------|------------------|----------|-----------|----------|------------|----------|----|
| 21738437 | 9   | rs10811604  | 9:21738437 G | C           | 0.995162    | 0.00674955      | 0.472469        | 1.00163         | 0.0111244   | 0.883253    | 0.00319496      | 0.00314922 | 0.0178845  | -0.00144228  | -0.00179046    | 0.420511       | -0.0075196         | 0.00232256  | 0.002120532 | 0.00528785      | 0.0035443    | 0.135718     | 0.001451         | 0.005001 | 0.717762  | NA       | 0.005895   | 9.04E-45 |    |
| 21741107 | 9   | rs9644821   | 9:21741107 T | C           | 0.995008    | 0.00750046      | 0.458513        | 1.00201         | 0.0111238   | 0.875048    | 0.0034027       | 0.00314992 | 0.0166899  | -0.00172646  | -0.00179194    | 0.475885       | -0.0071594         | 0.00232325  | 0.00125141  | 0.00544991      | 0.00354402   | 0.124104     | 0.001481         | 0.005003 | 0.807177  | 1.67E-44 | 0.00586639 | 1.67E-44 |    |
| 21751985 | 9   | rs1565444   | 9:21751985 T | C           | 0.995151    | 0.00674441      | 0.498985        | 1.00364         | 0.0111559   | 0.975907    | 0.0032085       | 0.00314941 | 0.0173039  | -0.0033927   | -0.00337890    | 0.434129       | -0.0073564         | 0.00232374  | 0.00112987  | 0.00535831      | 0.00354414   | 0.117851     | 0.001464         | 0.005001 | 0.768298  | 1.14E-44 | 0.00586205 | 1.14E-44 |    |
| 21741993 | 9   | rs1556697   | 9:21741993 C | A           | 0.995425    | 0.00674472      | 0.496629        | 1.00045         | 0.0111616   | 0.968075    | 0.00321052      | 0.00314823 | 0.0172595  | -0.00139234  | -0.00178912    | 0.436435       | -0.007579          | 0.00232088  | 0.00109248  | 0.00554755      | 0.00354415   | 0.117262     | 0.00148          | 0.005    | 0.762011  | NA       | 0.00586202 | 1.14E-44 |    |
| 21747420 | 9   | rs1372059   | 9:21747420 T | C           | 0.995442    | 0.00673438      | 0.498105        | 1.00042         | 0.0111115   | 0.970119    | 0.0032141       | 0.00314803 | 0.0171123  | -0.0013905   | -0.00178886    | 0.436974       | -0.0075582         | 0.00232054  | 0.0011257   | 0.0055291       | 0.00354412   | 0.118431     | 0.001578         | 0.004993 | 0.751958  | 2.47E-44 | 0.00586377 | 2.47E-44 |    |
| 21772037 | 9   | rs10075518  | 9:21772037 A | G           | 0.995147    | 0.00675518      | 0.471426        | 1.00059         | 0.0111315   | 0.957966    | 0.00324661      | 0.00315017 | 0.0111523  | -0.00143674  | -0.00179166    | 0.422608       | -0.0074344         | 0.00232416  | 0.00118035  | 0.00534215      | 0.00354666   | 0.132004     | 0.001311         | 0.004997 | 0.705051  | 1.05E-45 | 0.00587026 | 1.05E-45 |    |
| 21773222 | 9   | rs2184551   | 9:21773222 G | A           | 0.99537     | 0.00675873      | 0.492309        | 1.00045         | 0.0111382   | 0.964875    | 0.00324142      | 0.00315092 | 0.0164218  | -0.0012849   | -0.00179266    | 0.473256       | -0.0071979         | 0.00232547  | 0.0019666   | 0.00536826      | 0.00354861   | 0.130336     | 0.00097          | 0.005001 | 0.846214  | NA       | 0.00587027 | 1.34E-45 |    |
| 21757061 | 9   | rs10075724  | 9:21757061 G | A           | 0.995131    | 0.00675804      | 0.470148        | 1.00774         | 0.0111367   | 0.948763    | 0.00323206      | 0.00315075 | 0.0139685  | -0.00127837  | -0.00179249    | 0.457734       | -0.0071736         | 0.00232517  | 0.00203446  | 0.00537837      | 0.00354822   | 0.129272     | 0.000897         | 0.004997 | 0.850929  | NA       | 0.00587091 | 4.07E-46 |    |
| 21757957 | 9   | rs10075724  | 9:21757957 A | G           | 0.995096    | 0.00675833      | 0.466943        | 1.00039         | 0.0111371   | 0.936541    | 0.003230742     | 0.00315081 | 0.0143464  | -0.00128485  | -0.00179256    | 0.473517       | -0.0072049         | 0.00232527  | 0.00194155  | 0.00536656      | 0.00354836   | 0.130431     | 0.000907         | 0.004997 | 0.855936  | 2.54E-46 | 0.00587137 | 2.54E-46 |    |
| 21776631 | 9   | rs10075725  | 9:21776631 A | G           | 0.995139    | 0.00675876      | 0.470943        | 1.00223         | 0.0111358   | 0.925977    | 0.00323252      | 0.00315089 | 0.0144675  | -0.0012701   | -0.00179267    | 0.459113       | -0.0071761         | 0.00232524  | 0.0021121   | 0.00533892      | 0.00354856   | 0.13259      | 0.000965         | 0.004997 | 0.846086  | 2.55E-46 | 0.00587153 | 2.55E-46 |    |
| 21780251 | 9   | rs10784679  | 9:21780251 G | A           | 0.995425    | 0.00674483      | 0.375435        | 1.00066         | 0.0111337   | 0.983233    | 0.00324038      | 0.00315084 | 0.0111031  | -0.00133895  | -0.00179262    | 0.461121       | -0.0073161         | 0.00232539  | 0.00165393  | 0.00526885      | 0.00354807   | 0.140711     | 0.00138          | 0.005    | 0.769298  | NA       | 0.0058735  | 1.43E-47 |    |
| 21783932 | 9   | rs195053    | 9:21783932 A | G           | 0.995462    | 0.00676005      | 0.419856        | 1.00141         | 0.0111394   | 0.899182    | 0.0034177       | 0.00315111 | 0.0141241  | -0.00142478  | -0.00179298    | 0.426821       | -0.0072552         | 0.00232574  | 0.00118168  | 0.00535584      | 0.00354876   | 0.131245     | 0.001343         | 0.005003 | 0.788317  | 4.28E-47 | 0.00586964 | 4.28E-47 |    |
| 21785304 | 9   | rs1345022   | 9:21785304 T | C           | 0.994465    | 0.00676021      | 0.411585        | 1.00135         | 0.0111396   | 0.936077    | 0.0034214       | 0.00315113 | 0.0110795  | -0.00143474  | -0.00179301    | 0.426034       | -0.0072385         | 0.00232578  | 0.00181662  | 0.00534573      | 0.00354881   | 0.13198      | 0.001496         | 0.004999 | 0.764534  | NA       | 0.00587451 | 5.09E-47 |    |
| 21787402 | 9   | rs10781772  | 9:21787402 G | C           | 0.994941    | 0.0067607       | 0.439845        | 1.00112         | 0.0111406   | 0.917879    | 0.0034015       | 0.00315122 | 0.0120741  | -0.00145214  | -0.00179311    | 0.418031       | -0.0072956         | 0.00232594  | 0.00170914  | 0.00536861      | 0.0035491    | 0.130365     | 0.001199         | 0.005004 | 0.810654  | 8.33E-47 | 0.00587455 | 8.33E-47 |    |
| 21788081 | 9   | rs10780878  | 9:21788081 G | T           | 0.994315    | 0.00676133      | 0.431245        | 1.00105         | 0.0111412   | 0.926843    | 0.00340315      | 0.00315133 | 0.011836   | -0.00147504  | -0.00179327    | 0.4101771      | -0.0072839         | 0.00232608  | 0.00173988  | 0.00537385      | 0.00354929   | 0.129929     | 0.001294         | 0.005006 | 0.816054  | NA       | 0.00587489 | 4.03E-47 |    |
| 21788523 | 9   | rs10076284  | 9:21788523 G | A           | 0.994155    | 0.00676243      | 0.385912        | 1.00142         | 0.0111411   | 0.88957     | 0.00333557      | 0.00315131 | 0.0130756  | -0.00138805  | -0.00179321    | 0.438897       | -0.007182          | 0.00232609  | 0.00201801  | 0.00530356      | 0.00354938   | 0.135119     | 0.001236         | 0.005007 | 0.830204  | NA       | 0.00587249 | 7.55E-47 |    |
| 21790067 | 9   | rs10811617  | 9:21790067 G | A           | 0.9938      | 0.00676215      | 0.357747        | 1.0013          | 0.0111422   | 0.907133    | 0.00337043      | 0.00315142 | 0.0144709  | -0.00138567  | -0.00179337    | 0.439724       | -0.0071373         | 0.00232628  | 0.00215413  | 0.00526364      | 0.00354968   | 0.140929     | 0.001182         | 0.005019 | 0.818032  | NA       | 0.00587594 | 2.33E-46 |    |
| 21790142 | 9   | rs10811618  | 9:21790142 C | G           | 0.993304    | 0.00676219      | 0.320462        | 1.00223         | 0.0111424   | 0.894304    | 0.0033904       | 0.00315146 | 0.0142461  | -0.00138826  | -0.00179344    | 0.43888        | -0.0071373         | 0.00232634  | 0.00215525  | 0.0052934       | 0.00354978   | 0.142693     | 0.001186         | 0.005011 | 8.22139   | 5.34E-47 | 0.0058759  | 5.34E-47 |    |
| 21790669 | 9   | rs1542075   | 9:21790669 G | A           | 0.993871    | 0.00676227      | 0.363731        | 1.00223         | 0.0111423   | 0.841619    | 0.0033323       | 0.00315151 | 0.0136305  | -0.00134337  | -0.00179344    | 0.456588       | -0.0070044         | 0.00232639  | 0.00214629  | 0.00507723      | 0.00354983   | 0.153004     | 0.001205         | 0.005011 | 0.809577  | NA       | 0.00587759 | 1.19E-46 |    |
| 21790755 | 9   | rs1542076   | 9:21790755 T | C           | 0.993872    | 0.00676227      | 0.227106        | 1.00296         | 0.0111433   | 0.790907    | 0.00350677      | 0.00315039 | 0.00940871 | -0.000926152 | -0.00179208    | 0.605294       | -0.006969          | 0.00232421  | 0.00271384  | 0.00547947      | 0.00354967   | 0.122388     | 0.001374         | 0.005012 | 0.808514  | NA       | 0.00587514 | 8.53E-46 |    |
| 21799598 | 9   | rs1073503   | 9:21799598 C | G           | 0.992398    | 0.00677074      | 0.259697        | 1.00342         | 0.0111528   | 0.759762    | 0.00297488      | 0.00315303 | 0.0279013  | -0.00118667  | -0.00179532    | 0.507911       | -0.0062772         | 0.00232851  | 0.00270211  | 0.00448032      | 0.00355288   | 0.207296     | 3.80E-05         | 0.005024 | 0.993945  | NA       | 0.0059395  | 2.67E-47 |    |
| 21801530 | 9   | rs4364717   | 9:21801530 G | T           | 0.984642    | 0.0067732       | 0.0223084       | 1.00096         | 0.0111617   | 0.931659    | 0.00410857      | 0.0031504  | 0.02241032 | -0.00010543  | -0.00179159    | 0.959386       | -0.0056914         | 0.00232851  | 0.0146107   | 0.00681431      | 0.0035579    | 0.0554661    | -0.0008014       | 0.005006 | 0.870792  | NA       | 0.00589566 | 1.14E-33 |    |
| 21803183 | 9   | rs193505    | 9:21803183 A | G           | 0.993264    | 0.00675682      | 0.317163        | 1.00167         | 0.0111317   | 0.880782    | 0.00350387      | 0.00315017 | 0.00936447 | -0.000886567 | -0.00179196    | 0.62078        | -0.0068746         | 0.00232391  | 0.00309474  | 0.0055345       | 0.00354632   | 0.118611     | 0.002158         | 0.005026 | 0.667711  | 2.63E-49 | 0.00587372 | 2.63E-49 |    |
| 21803880 | 9   | rs871024    | 9:21803880 C | C           | 0.993774    | 0.00675617      | 0.355244        | 1.00157         | 0.0111305   | 0.882214    | 0.0035389       | 0.00315    | 0.0135754  | -0.00087325  | -0.00179195    | 0.625995       | -0.0068771         | 0.00232362  | 0.00380105  | 0.00559827      | 0.00354592   | 0.114385     | 0.001574         | 0.005008 | 0.753292  | 1.17E-49 | 0.00587229 | 1.17E-49 |    |
| 21804617 | 9   | rs108930    | 9:21804617 G | A           | 0.993742    | 0.00675472      | 0.352875        | 1.00161         | 0.0111326   | 0.885402    | 0.00352465      | 0.00315027 | 0.00869942 | -0.000824576 | -0.0017921     | 0.645342       | -0.0068841         | 0.0023241   | 0.00294451  | 0.00565611      | 0.00354663   | 0.110761     | 0.001582         | 0.005008 | 0.752035  | NA       | 0.00587454 | 5.93E-50 |    |
| 21804693 | 9   | rs10811623  | 9:21804693 G | A           | 0.99361     | 0.00675725      | 0.328275        | 1.00147         | 0.0111324   | 0.89482     | 0.00353884      | 0.00315024 | 0.00877054 | -0.000837093 | -0.00179206    | 0.640419       | -0.0069099         | 0.00232405  | 0.00294739  | 0.00566985      | 0.00354658   | 0.109983     | 0.001375         | 0.005007 | 0.737971  | NA       | 0.00587261 | 1.18E-49 |    |
| 21811154 | 9   | rs10811623  | 9:21811154 G | A           | NA          | NA              | NA              | NA              | NA          | NA          | NA              | NA         | NA         | NA           | NA             | NA             | NA                 | NA          | NA          | NA              | NA           | NA           | NA               | NA       | NA        | NA       | NA         | NA       | NA |
| 21813241 | 9   | rs107269156 | 9:21813241 C | T           | 1.01242     | 0.00679989      | 0.0693861       | 1.00736         | 0.0112005   | 0.51293     | -0.0044545      | 0.00135818 | 0.00103905 | 0.000119742  | 0.00180279     | 0.947043       | 0.00702029         | 0.0033831   | 0.00267767  | -0.0075661      | 0.00356829   | 0.033975     | -0.001464        | 0.005046 | 0.717767  | NA       | 0.00593932 | 3.76E-38 |    |
| 21813303 | 9   | rs107269156 | 9:21813303 T | C           | 1.01242     | 0.00679971      | 0.0693802       | 1.0074          | 0.012005    | 0.51047     | -0.0044592      | 0.00135815 | 0.00102627 | 0.000122807  | 0.00180276     | 0.945689       | 0.00700731         | 0.0033808   | 0.00272632  | -0.007559       | 0.00356822   | 0.034196     | -0.001495        | 0.005046 | 0.766595  | NA       | 0.00593957 | 3.78E-38 |    |
| 21813495 | 9   | rs107269156 | 9:21813495 T | C           | 1.01233     | 0.00680293      | 0.0717386       | 1.00723         | 0.012063    | 0.520118    | -0.0044377      | 0.00135886 | 0.00137668 | 6.95E-05     | 0.00180376     | 0.969266       | 0.00710077         | 0.0033939   | 0.00240312  | -0.007432       | 0.00357011   | 0.0373677    | -0.001542        | 0.005046 | 0.759926  | 3.19E-38 | 0.00594133 | 3.19E-38 |    |
| 21813518 | 9   | rs107269156 | 9:21813518 T | C           | 1.01231     | 0.00680017      | 0.0718818       | 1.00743         | 0.012013    | 0.508444    | -0.0044454      | 0.00135887 | 0.00095917 | 0.000135397  | 0.00180292     | 0.943136       | 0.00702335         | 0.0033829   | 0.0026795   | -0.0075971      | 0.00356854   | 0.033262     | -0.001412        | 0.005046 | 0.779574  | 3.58E-38 | 0.00593765 | 3.58E-38 |    |
| 21816528 | 9   | rs10723329  | 9:21816528 G | A           | 0.992353    | 0.00673554      | 0.254839        | 0.99341         | 0.011099    | 0.551358    | 0.002           |            |            |              |                |                |                    |             |             |                 |              |              |                  |          |           |          |            |          |    |

**Supplementary Table 3.** MPRA results for selected variants in the MTAP/CDKN2A and CASP8 regions. 'Function' refers to the inferred function of a SNP, activator means that the alternative allele is significantly associated to higher mRNA expression of the target gene. 'UACC903/HEK293' refers to analyses considering both cells together, 'UACC903 Only' refers to these cells considered alone. FDR: False discovery rate.

| <i>CDKN2A</i> |     |     |                |              |             |              |              |             |
|---------------|-----|-----|----------------|--------------|-------------|--------------|--------------|-------------|
|               |     |     | UACC903/HEK293 |              |             | UACC903 Only |              |             |
| MPRA rsID     | ref | alt | function       | log2 alt/ref | FDR alt/ref | function     | log2 alt/ref | FDR alt/ref |
| rs10811617    | A   | C   | activator      | -0.1115834   | 0.0003498   | NA           | -0.1310841   | 0.04907075  |
| rs10811618    | G   | C   | NA             | -0.0069935   | 0.49136839  | NA           | -0.02485     | 0.82045209  |
| rs4364717     | A   | G   | NA             | 0.03813089   | 0.46598857  | NA           | 0.0041674    | 0.97400112  |
| rs935055      | G   | C   | NA             | -0.1888638   | 0.01917813  | NA           | -0.5283158   | 0.06744791  |
| rs871024      | C   | A   | NA             | 0.0282317    | 0.21580096  | NA           | 0.11130019   | 0.24016397  |
| rs869330      | A   | G   | NA             | -0.098019    | 0.12720868  | NA           | -0.2419938   | 0.26797427  |
| rs869329      | A   | G   | NA             | 0.04421337   | 0.1503776   | NA           | 0.09470067   | 0.38789033  |
| rs80138396    | C   | CAG | NA             | 0.13444829   | 0.000078444 | NA           | 0.21305865   | 0.01296601  |
| rs10811623    | A   | G   | NA             | -0.0130452   | 0.49494295  | NA           | -0.0456452   | 0.52647324  |
| rs72691562    | A   | C   | NA             | -0.0123984   | 0.88597614  | NA           | 0.01065259   | 0.97400112  |
| rs72691563    | C   | T   | NA             | 0.00878286   | 0.30528242  | NA           | 0.09554636   | 0.24649207  |
| rs72691564    | C   | T   | NA             | -0.0581653   | 0.07100476  | NA           | -0.1410606   | 0.16889296  |
| rs34710113    | GT  | G   | NA             | -0.030248698 | 0.697851764 | NA           | -0.073210005 | 0.714809983 |
| <i>CASP8</i>  |     |     |                |              |             |              |              |             |
|               |     |     | 903/HEK        |              |             | 903 Only     |              |             |
| MPRA rsID     | ref | alt | function       | log2 alt/ref | FDR alt/ref | function     | log2 alt/ref | FDR alt/ref |
| rs3769823     | A   | G   | activator      | -0.364734794 | 3.06543E-18 | activator    | -0.648012254 | 1.85585E-12 |
| rs1861270     | A   | G   | NA             | -0.091384646 | 0.40396426  | NA           | -0.332661928 | 0.539449943 |
| rs2349070     | A   | C   | NA             | 0.174687342  | 0.156229406 | NA           | 0.208464406  | 0.984241149 |
| rs6737085     | T   | A   | NA             | -0.044147357 | 0.507201012 | NA           | 0.090314509  | 0.556421584 |
| rs2540334     | C   | T   | NA             | 0.129891041  | 0.062687748 | NA           | 0.037778019  | 0.736362581 |



**Supplementary Table 5.** Transcription start sites annotated for each gene of interest. Coordinates are in GRCh37.

| Gene stable ID  | strand | chr | transcript_name | transcript_stable_id | start_coord |
|-----------------|--------|-----|-----------------|----------------------|-------------|
| ENSG00000049656 | -1     | 5   | CLPTM1L-008     | ENST00000507807      | 1341853     |
| ENSG00000049656 | -1     | 5   | CLPTM1L-007     | ENST00000507195      | 1326551     |
| ENSG00000049656 | -1     | 5   | CLPTM1L-010     | ENST00000506641      | 1326370     |
| ENSG00000003402 | 1      | 2   | CFLAR-015       | ENST00000441224      | 201981560   |
| ENSG00000003402 | 1      | 2   | CFLAR-016       | ENST00000433445      | 201981762   |
| ENSG00000003402 | 1      | 2   | CFLAR-008       | ENST00000423241      | 201983214   |
| ENSG00000003402 | 1      | 2   | CFLAR-009       | ENST00000439154      | 201983387   |
| ENSG00000003402 | 1      | 2   | CFLAR-027       | ENST00000490965      | 201983246   |
| ENSG00000003402 | 1      | 2   | CFLAR-017       | ENST00000425030      | 201987200   |
| ENSG00000003402 | 1      | 2   | CFLAR-010       | ENST00000440180      | 201994226   |
| ENSG00000003402 | 1      | 2   | CFLAR-018       | ENST00000417748      | 201994052   |
| ENSG00000003402 | 1      | 2   | CFLAR-021       | ENST00000494258      | 201997502   |
| ENSG00000003402 | 1      | 2   | CFLAR-022       | ENST00000470178      | 201997595   |
| ENSG00000003402 | 1      | 2   | CFLAR-023       | ENST00000462763      | 201997676   |
| ENSG00000172927 | 1      | 11  | MYEOV-009       | ENST00000544781      | 69066741    |
| ENSG00000101440 | 1      | 20  | ASIP-002        | ENST00000568305      | 32782375    |
| ENSG00000183844 | 1      | 21  | FAM3B-005       | ENST00000398646      | 42694747    |
| ENSG00000183844 | 1      | 21  | FAM3B-001       | ENST00000357985      | 42688661    |
| ENSG00000183844 | 1      | 21  | FAM3B-002       | ENST00000479810      | 42676139    |
| ENSG00000183844 | 1      | 21  | FAM3B-006       | ENST00000518236      | 42676177    |
| ENSG00000099810 | 1      | 9   | MTAP-013        | ENST00000427788      | 21803277    |
| ENSG00000147889 | -1     | 9   | CDKN2A-007      | ENST00000470819      | 21994872    |
| ENSG00000147889 | -1     | 9   | CDKN2A-001      | ENST00000304494      | 21975097    |
| ENSG00000147889 | -1     | 9   | CDKN2A-003      | ENST00000380151      | 21974826    |
| ENSG00000147889 | -1     | 9   | CDKN2A-009      | ENST00000498124      | 21974865    |
| ENSG00000147889 | -1     | 9   | CDKN2A-014      | ENST00000579122      | 21974857    |
| ENSG00000149311 | 1      | 11  | ATM-003         | ENST00000452508      | 108093843   |
| ENSG00000149311 | 1      | 11  | ATM-016         | ENST00000532931      | 108093817   |
| ENSG00000149311 | 1      | 11  | ATM-026         | ENST00000527891      | 108093812   |
| ENSG00000149311 | 1      | 11  | ATM-004         | ENST00000526567      | 108094256   |
| ENSG00000100151 | 1      | 22  | PICK1-002       | ENST00000356976      | 38453414    |
| ENSG00000100151 | 1      | 22  | PICK1-006       | ENST00000476157      | 38453411    |
| ENSG00000100151 | 1      | 22  | PICK1-007       | ENST00000468288      | 38453411    |
| ENSG00000100151 | 1      | 22  | PICK1-011       | ENST00000469819      | 38453414    |
| ENSG00000100151 | 1      | 22  | PICK1-013       | ENST00000426258      | 38453411    |
| ENSG00000100151 | 1      | 22  | PICK1-016       | ENST00000437453      | 38453402    |
| ENSG00000064012 | 1      | 2   | CASP8-001       | ENST00000437283      | 202122841   |
| ENSG00000064012 | 1      | 2   | CASP8-002       | ENST00000358485      | 202122759   |
| ENSG00000064012 | 1      | 2   | CASP8-007       | ENST00000339403      | 202123047   |
| ENSG00000064012 | 1      | 2   | CASP8-010       | ENST00000447616      | 202122703   |
| ENSG00000064012 | 1      | 2   | CASP8-011       | ENST00000490412      | 202122842   |
| ENSG00000064012 | 1      | 2   | CASP8-023       | ENST00000413726      | 202122841   |
| ENSG00000064012 | 1      | 2   | CASP8-012       | ENST00000323492      | 202125223   |
| ENSG00000064012 | 1      | 2   | CASP8-026       | ENST00000429881      | 202126679   |
| ENSG00000140718 | 1      | 16  | FTO-002         | ENST00000460382      | 53920842    |
| ENSG00000140718 | 1      | 16  | FTO-006         | ENST00000431610      | 53920829    |
| ENSG00000140718 | 1      | 16  | FTO-007         | ENST00000472835      | 54097549    |
| ENSG00000183486 | 1      | 21  | MX2-008         | ENST00000418103      | 42742441    |
| ENSG00000183486 | 1      | 21  | MX2-009         | ENST00000416447      | 42742140    |
| ENSG00000143379 | 1      | 1   | SETDB1-008      | ENST00000423081      | 150899116   |
| ENSG00000184381 | -1     | 22  | PLA2G6-005      | ENST00000417303      | 38588107    |
| ENSG00000184381 | -1     | 22  | PLA2G6-008      | ENST00000452972      | 38564097    |
| ENSG00000184381 | -1     | 22  | PLA2G6-009      | ENST00000479641      | 38564084    |
| ENSG00000184381 | -1     | 22  | PLA2G6-015      | ENST00000498338      | 38539501    |
| ENSG00000086991 | -1     | 11  | NOX4-006        | ENST00000528341      | 89223900    |
| ENSG00000086991 | -1     | 11  | NOX4-005        | ENST00000343727      | 89224299    |













|                     |                     |   |     |              |     |   |   |
|---------------------|---------------------|---|-----|--------------|-----|---|---|
| IV6-1887752-1887764 | IV6-1887752-1887764 | 1 | 700 | CantonRegion | 500 | 1 | 0 |
| IV6-1887765-1887777 | IV6-1887765-1887777 | 1 | 200 | CantonRegion | 500 | 1 | 0 |
| IV6-1887778-1887790 | IV6-1887778-1887790 | 1 | 400 | CantonRegion | 500 | 1 | 0 |
| IV6-1887801-1887813 | IV6-1887801-1887813 | 1 | 400 | CantonRegion | 500 | 1 | 0 |
| IV6-1887814-1887826 | IV6-1887814-1887826 | 1 | 400 | CantonRegion | 500 | 1 | 0 |
| IV6-1887827-1887839 | IV6-1887827-1887839 | 1 | 400 | CantonRegion | 500 | 1 | 0 |
| IV6-1887840-1887852 | IV6-1887840-1887852 | 1 | 400 | CantonRegion | 500 | 1 | 0 |
| IV6-1887853-1887865 | IV6-1887853-1887865 | 1 | 400 | CantonRegion | 500 | 1 | 0 |
| IV6-1887866-1887878 | IV6-1887866-1887878 | 1 | 400 | CantonRegion | 500 | 1 | 0 |
| IV6-1887879-1887891 | IV6-1887879-1887891 | 1 | 400 | CantonRegion | 500 | 1 | 0 |
| IV6-1887892-1887904 | IV6-1887892-1887904 | 1 | 400 | CantonRegion | 500 | 1 | 0 |
| IV6-1887905-1887917 | IV6-1887905-1887917 | 1 | 400 | CantonRegion | 500 | 1 | 0 |
| IV6-1887918-1887930 | IV6-1887918-1887930 | 1 | 400 | CantonRegion | 500 | 1 | 0 |
| IV6-1887931-1887943 | IV6-1887931-1887943 | 1 | 400 | CantonRegion | 500 | 1 | 0 |
| IV6-1887944-1887956 | IV6-1887944-1887956 | 1 | 400 | CantonRegion | 500 | 1 | 0 |
| IV6-1887957-1887969 | IV6-1887957-1887969 | 1 | 400 | CantonRegion | 500 | 1 | 0 |
| IV6-1887970-1887982 | IV6-1887970-1887982 | 1 | 400 | CantonRegion | 500 | 1 | 0 |
| IV6-1887983-1887995 | IV6-1887983-1887995 | 1 | 400 | CantonRegion | 500 | 1 | 0 |
| IV6-1887996-1888008 | IV6-1887996-1888008 | 1 | 400 | CantonRegion | 500 | 1 | 0 |
| IV6-1888009-1888021 | IV6-1888009-1888021 | 1 | 400 | CantonRegion | 500 | 1 | 0 |
| IV6-1888022-1888034 | IV6-1888022-1888034 | 1 | 400 | CantonRegion | 500 | 1 | 0 |
| IV6-1888035-1888047 | IV6-1888035-1888047 | 1 | 400 | CantonRegion | 500 | 1 | 0 |
| IV6-1888048-1888060 | IV6-1888048-1888060 | 1 | 400 | CantonRegion | 500 | 1 | 0 |
| IV6-1888061-1888073 | IV6-1888061-1888073 | 1 | 400 | CantonRegion | 500 | 1 | 0 |
| IV6-1888074-1888086 | IV6-1888074-1888086 | 1 | 400 | CantonRegion | 500 | 1 | 0 |
| IV6-1888087-1888100 | IV6-1888087-1888100 | 1 | 400 | CantonRegion | 500 | 1 | 0 |
| IV6-1888101-1888113 | IV6-1888101-1888113 | 1 | 400 | CantonRegion | 500 | 1 | 0 |
| IV6-1888114-1888126 | IV6-1888114-1888126 | 1 | 400 | CantonRegion | 500 | 1 | 0 |
| IV6-1888127-1888139 | IV6-1888127-1888139 | 1 | 400 | CantonRegion | 500 | 1 | 0 |
| IV6-1888140-1888152 | IV6-1888140-1888152 | 1 | 400 | CantonRegion | 500 | 1 | 0 |
| IV6-1888153-1888165 | IV6-1888153-1888165 | 1 | 400 | CantonRegion | 500 | 1 | 0 |
| IV6-1888166-1888178 | IV6-1888166-1888178 | 1 | 400 | CantonRegion | 500 | 1 | 0 |
| IV6-1888179-1888191 | IV6-1888179-1888191 | 1 | 400 | CantonRegion | 500 | 1 | 0 |
| IV6-1888192-1888204 | IV6-1888192-1888204 | 1 | 400 | CantonRegion | 500 | 1 | 0 |
| IV6-1888205-1888217 | IV6-1888205-1888217 | 1 | 400 | CantonRegion | 500 | 1 | 0 |
| IV6-1888218-1888230 | IV6-1888218-1888230 | 1 | 400 | CantonRegion | 500 | 1 | 0 |
| IV6-1888231-1888243 | IV6-1888231-1888243 | 1 | 400 | CantonRegion | 500 | 1 | 0 |
| IV6-1888244-1888256 | IV6-1888244-1888256 | 1 | 400 | CantonRegion | 500 | 1 | 0 |
| IV6-1888257-1888269 | IV6-1888257-1888269 | 1 | 400 | CantonRegion | 500 | 1 | 0 |
| IV6-1888270-1888282 | IV6-1888270-1888282 | 1 | 400 | CantonRegion | 500 | 1 | 0 |
| IV6-1888283-1888295 | IV6-1888283-1888295 | 1 | 400 | CantonRegion | 500 | 1 | 0 |
| IV6-1888296-1888308 | IV6-1888296-1888308 | 1 | 400 | CantonRegion | 500 | 1 | 0 |
| IV6-1888309-1888321 | IV6-1888309-1888321 | 1 | 400 | CantonRegion | 500 | 1 | 0 |
| IV6-1888322-1888334 | IV6-1888322-1888334 | 1 | 400 | CantonRegion | 500 | 1 | 0 |
| IV6-1888335-1888347 | IV6-1888335-1888347 | 1 | 400 | CantonRegion | 500 | 1 | 0 |
| IV6-1888348-1888360 | IV6-1888348-1888360 | 1 | 400 | CantonRegion | 500 | 1 | 0 |
| IV6-1888361-1888373 | IV6-1888361-1888373 | 1 | 400 | CantonRegion | 500 | 1 | 0 |
| IV6-1888374-1888386 | IV6-1888374-1888386 | 1 | 400 | CantonRegion | 500 | 1 | 0 |
| IV6-1888387-1888399 | IV6-1888387-1888399 | 1 | 400 | CantonRegion | 500 | 1 | 0 |
| IV6-1888400-1888412 | IV6-1888400-1888412 | 1 | 400 | CantonRegion | 500 | 1 | 0 |
| IV6-1888413-1888425 | IV6-1888413-1888425 | 1 | 400 | CantonRegion | 500 | 1 | 0 |
| IV6-1888426-1888438 | IV6-1888426-1888438 | 1 | 400 | CantonRegion | 500 | 1 | 0 |
| IV6-1888439-1888451 | IV6-1888439-1888451 | 1 | 400 | CantonRegion | 500 | 1 | 0 |
| IV6-1888452-1888464 | IV6-1888452-1888464 | 1 | 400 | CantonRegion | 500 | 1 | 0 |
| IV6-1888465-1888477 | IV6-1888465-1888477 | 1 | 400 | CantonRegion | 500 | 1 | 0 |
| IV6-1888478-1888490 | IV6-1888478-1888490 | 1 | 400 | CantonRegion | 500 | 1 | 0 |
| IV6-1888491-1888503 | IV6-1888491-1888503 | 1 | 400 | CantonRegion | 500 | 1 | 0 |
| IV6-1888504-1888516 | IV6-1888504-1888516 | 1 | 400 | CantonRegion | 500 | 1 | 0 |
| IV6-1888517-1888529 | IV6-1888517-1888529 | 1 | 400 | CantonRegion | 500 | 1 | 0 |
| IV6-1888530-1888542 | IV6-1888530-1888542 | 1 | 400 | CantonRegion | 500 | 1 | 0 |
| IV6-1888543-1888555 | IV6-1888543-1888555 | 1 | 400 | CantonRegion | 500 | 1 | 0 |
| IV6-1888556-1888568 | IV6-1888556-1888568 | 1 | 400 | CantonRegion | 500 | 1 | 0 |
| IV6-1888569-1888581 | IV6-1888569-1888581 | 1 | 400 | CantonRegion | 500 | 1 | 0 |
| IV6-1888582-1888594 | IV6-1888582-1888594 | 1 | 400 | CantonRegion | 500 | 1 | 0 |
| IV6-1888595-1888607 | IV6-1888595-1888607 | 1 | 400 | CantonRegion | 500 | 1 | 0 |
| IV6-1888608-1888620 | IV6-1888608-1888620 | 1 | 400 | CantonRegion | 500 | 1 | 0 |
| IV6-1888621-1888633 | IV6-1888621-1888633 | 1 | 400 | CantonRegion | 500 | 1 | 0 |
| IV6-1888634-1888646 | IV6-1888634-1888646 | 1 | 400 | CantonRegion | 500 | 1 | 0 |
| IV6-1888647-1888659 | IV6-1888647-1888659 | 1 | 400 | CantonRegion | 500 | 1 | 0 |
| IV6-1888660-1888672 | IV6-1888660-1888672 | 1 | 400 | CantonRegion | 500 | 1 | 0 |
| IV6-1888673-1888685 | IV6-1888673-1888685 | 1 | 400 | CantonRegion | 500 | 1 | 0 |
| IV6-1888686-1888698 | IV6-1888686-1888698 | 1 | 400 | CantonRegion | 500 | 1 | 0 |
| IV6-1888699-1888711 | IV6-1888699-1888711 | 1 | 400 | CantonRegion | 500 | 1 | 0 |
| IV6-1888712-1888724 | IV6-1888712-1888724 | 1 | 400 | CantonRegion | 500 | 1 | 0 |
| IV6-1888725-1888737 | IV6-1888725-1888737 | 1 | 400 | CantonRegion | 500 | 1 | 0 |
| IV6-1888738-1888750 | IV6-1888738-1888750 | 1 | 400 | CantonRegion | 500 | 1 | 0 |
| IV6-1888751-1888763 | IV6-1888751-1888763 | 1 | 400 | CantonRegion | 500 | 1 | 0 |
| IV6-1888764-1888776 | IV6-1888764-1888776 | 1 | 400 | CantonRegion | 500 | 1 | 0 |
| IV6-1888777-1888789 | IV6-1888777-1888789 | 1 | 400 | CantonRegion | 500 | 1 | 0 |
| IV6-1888790-1888802 | IV6-1888790-1888802 | 1 | 400 | CantonRegion | 500 | 1 | 0 |
| IV6-1888803-1888815 | IV6-1888803-1888815 | 1 | 400 | CantonRegion | 500 | 1 | 0 |
| IV6-1888816-1888828 | IV6-1888816-1888828 | 1 | 400 | CantonRegion | 500 | 1 | 0 |
| IV6-1888829-1888841 | IV6-1888829-1888841 | 1 | 400 | CantonRegion | 500 | 1 | 0 |
| IV6-1888842-1888854 | IV6-1888842-1888854 | 1 | 400 | CantonRegion | 500 | 1 | 0 |
| IV6-1888855-1888867 | IV6-1888855-1888867 | 1 | 400 | CantonRegion | 500 | 1 | 0 |
| IV6-1888868-1888880 | IV6-1888868-1888880 | 1 | 400 | CantonRegion | 500 | 1 | 0 |
| IV6-1888881-1888893 | IV6-1888881-1888893 | 1 | 400 | CantonRegion | 500 | 1 | 0 |
| IV6-1888894-1888906 | IV6-1888894-1888906 | 1 | 400 | CantonRegion | 500 | 1 | 0 |
| IV6-1888907-1888919 | IV6-1888907-1888919 | 1 | 400 | CantonRegion | 500 | 1 | 0 |
| IV6-1888920-1888932 | IV6-1888920-1888932 | 1 | 400 | CantonRegion | 500 | 1 | 0 |
| IV6-1888933-1888945 | IV6-1888933-1888945 | 1 | 400 | CantonRegion | 500 | 1 | 0 |
| IV6-1888946-1888958 | IV6-1888946-1888958 | 1 | 400 | CantonRegion | 500 | 1 | 0 |
| IV6-1888959-1888971 | IV6-1888959-1888971 | 1 | 400 | CantonRegion | 500 | 1 | 0 |
| IV6-1888972-1888984 | IV6-1888972-1888984 | 1 | 400 | CantonRegion | 500 | 1 | 0 |
| IV6-1888985-1888997 | IV6-1888985-1888997 | 1 | 400 | CantonRegion | 500 | 1 | 0 |
| IV6-1889000-1889012 | IV6-1889000-1889012 | 1 | 400 | CantonRegion | 500 | 1 | 0 |
| IV6-1889013-1889025 | IV6-1889013-1889025 | 1 | 400 | CantonRegion | 500 | 1 | 0 |
| IV6-1889026-1889038 | IV6-1889026-1889038 | 1 | 400 | CantonRegion | 500 | 1 | 0 |
| IV6-1889039-1889051 | IV6-1889039-1889051 | 1 | 400 | CantonRegion | 500 | 1 | 0 |
| IV6-1889052-1889064 | IV6-1889052-1889064 | 1 | 400 | CantonRegion | 500 | 1 | 0 |
| IV6-1889065-1889077 | IV6-1889065-1889077 | 1 | 400 | CantonRegion | 500 | 1 | 0 |
| IV6-1889078-1889090 | IV6-1889078-1889090 | 1 | 400 | CantonRegion | 500 | 1 | 0 |
| IV6-1889093-1889105 | IV6-1889093-1889105 | 1 | 400 | CantonRegion | 500 | 1 | 0 |
| IV6-1889106-1889118 | IV6-1889106-1889118 | 1 | 400 | CantonRegion | 500 | 1 | 0 |
| IV6-1889119-1889131 | IV6-1889119-1889131 | 1 | 400 | CantonRegion | 500 | 1 | 0 |
| IV6-1889132-1889144 | IV6-1889132-1889144 | 1 | 400 | CantonRegion | 500 | 1 | 0 |
| IV6-1889145-1889157 | IV6-1889145-1889157 | 1 | 400 | CantonRegion | 500 | 1 | 0 |
| IV6-1889158-1889170 | IV6-1889158-1889170 | 1 | 400 | CantonRegion | 500 | 1 | 0 |
| IV6-1889171-1889183 | IV6-1889171-1889183 | 1 | 400 | CantonRegion | 500 | 1 | 0 |
| IV6-1889184-1889196 | IV6-1889184-1889196 | 1 | 400 | CantonRegion | 500 | 1 | 0 |
| IV6-1889197-1889209 | IV6-1889197-1889209 | 1 | 400 | CantonRegion | 500 | 1 | 0 |
| IV6-1889210-1889222 | IV6-1889210-1889222 | 1 | 400 | CantonRegion | 500 | 1 | 0 |
| IV6-1889223-1889235 | IV6-1889223-1889235 | 1 | 400 | CantonRegion | 500 | 1 | 0 |
| IV6-1889236-1889248 | IV6-1889236-1889248 | 1 | 400 | CantonRegion | 500 | 1 | 0 |
| IV6-1889249-1889261 | IV6-1889249-1889261 | 1 | 400 | CantonRegion | 500 | 1 | 0 |
| IV6-1889262-1889274 | IV6-1889262-1889274 | 1 | 400 | CantonRegion | 500 | 1 | 0 |
| IV6-1889275-1889287 | IV6-1889275-1889287 | 1 | 400 | CantonRegion | 500 | 1 | 0 |
| IV6-1889288-1889300 | IV6-1889288-1889300 | 1 | 400 | CantonRegion | 500 | 1 | 0 |
| IV6-1889301-1889313 | IV6-1889301-1889313 | 1 | 400 | CantonRegion | 500 | 1 | 0 |
| IV6-1889314-1889326 | IV6-1889314-1889326 | 1 | 400 | CantonRegion | 500 | 1 | 0 |
| IV6-1889327-1889339 | IV6-1889327-1889339 | 1 | 400 | CantonRegion | 500 | 1 | 0 |
| IV6-1889340-1889352 | IV6-1889340-1889352 | 1 | 400 | CantonRegion | 500 | 1 | 0 |
| IV6-1889353-1889365 | IV6-1889353-1889365 | 1 | 400 | CantonRegion | 500 | 1 | 0 |
| IV6-1889366-1889378 | IV6-1889366-1889378 | 1 | 400 | CantonRegion | 500 | 1 | 0 |
| IV6-1889379-1889391 | IV6-1889379-1889391 | 1 | 400 | CantonRegion | 500 | 1 | 0 |
| IV6-1889392-1889404 | IV6-1889392-1889404 | 1 | 400 | CantonRegion | 500 | 1 | 0 |
| IV6-1889405-1889417 | IV6-1889405-1889417 | 1 | 400 | CantonRegion | 500 | 1 | 0 |
| IV6-1889418-1889430 | IV6-1889418-1889430 | 1 | 400 | CantonRegion | 500 | 1 | 0 |
| IV6-1889431-1889443 | IV6-1889431-1889443 | 1 | 400 | CantonRegion | 500 | 1 | 0 |
| IV6-1889444-1889456 | IV6-1889444-1889456 | 1 | 400 | CantonRegion | 500 | 1 | 0 |
| IV6-1889457-1889469 | IV6-1889457-1889469 | 1 | 400 | CantonRegion | 500 | 1 | 0 |
| IV6-1889470-1889482 | IV6-1889470-1889482 | 1 | 400 | CantonRegion | 500 | 1 | 0 |
| IV6-1889483-1889495 | IV6-1889483-1889495 | 1 | 400 | CantonRegion | 500 | 1 | 0 |
| IV6-1889496-1889508 | IV6-1889496-1889508 | 1 |     |              |     |   |   |









|           |                     |   |      |              |     |   |   |
|-----------|---------------------|---|------|--------------|-----|---|---|
| 015248873 | 015248873-015248873 | 1 | 2567 | CastorRegion | 500 | 1 | 0 |
| 015248874 | 015248874-015248874 | 1 | 108  | CastorRegion | 500 | 1 | 0 |
| 015248875 | 015248875-015248875 | 1 | 400  | CastorRegion | 500 | 1 | 0 |
| 015248876 | 015248876-015248876 | 1 | 100  | CastorRegion | 500 | 1 | 0 |
| 015248877 | 015248877-015248877 | 1 | 400  | CastorRegion | 500 | 1 | 0 |
| 015248878 | 015248878-015248878 | 1 | 206  | CastorRegion | 500 | 1 | 0 |
| 015248879 | 015248879-015248879 | 1 | 176  | CastorRegion | 500 | 1 | 0 |
| 015248880 | 015248880-015248880 | 1 | 279  | CastorRegion | 500 | 1 | 0 |
| 015248881 | 015248881-015248881 | 1 | 520  | CastorRegion | 500 | 1 | 0 |
| 015248882 | 015248882-015248882 | 1 | 206  | CastorRegion | 500 | 1 | 0 |
| 015248883 | 015248883-015248883 | 1 | 303  | CastorRegion | 500 | 1 | 0 |
| 015248884 | 015248884-015248884 | 1 | 276  | CastorRegion | 500 | 1 | 0 |
| 015248885 | 015248885-015248885 | 1 | 216  | CastorRegion | 500 | 1 | 0 |
| 015248886 | 015248886-015248886 | 1 | 400  | CastorRegion | 500 | 1 | 0 |
| 015248887 | 015248887-015248887 | 1 | 400  | CastorRegion | 500 | 1 | 0 |
| 015248888 | 015248888-015248888 | 1 | 237  | CastorRegion | 500 | 1 | 0 |
| 015248889 | 015248889-015248889 | 1 | 400  | CastorRegion | 500 | 1 | 0 |
| 015248890 | 015248890-015248890 | 1 | 400  | CastorRegion | 500 | 1 | 0 |
| 015248891 | 015248891-015248891 | 1 | 400  | CastorRegion | 500 | 1 | 0 |
| 015248892 | 015248892-015248892 | 1 | 400  | CastorRegion | 500 | 1 | 0 |
| 015248893 | 015248893-015248893 | 1 | 400  | CastorRegion | 500 | 1 | 0 |
| 015248894 | 015248894-015248894 | 1 | 400  | CastorRegion | 500 | 1 | 0 |
| 015248895 | 015248895-015248895 | 1 | 400  | CastorRegion | 500 | 1 | 0 |
| 015248896 | 015248896-015248896 | 1 | 400  | CastorRegion | 500 | 1 | 0 |
| 015248897 | 015248897-015248897 | 1 | 400  | CastorRegion | 500 | 1 | 0 |
| 015248898 | 015248898-015248898 | 1 | 400  | CastorRegion | 500 | 1 | 0 |
| 015248899 | 015248899-015248899 | 1 | 400  | CastorRegion | 500 | 1 | 0 |
| 015248900 | 015248900-015248900 | 1 | 400  | CastorRegion | 500 | 1 | 0 |
| 015248901 | 015248901-015248901 | 1 | 400  | CastorRegion | 500 | 1 | 0 |
| 015248902 | 015248902-015248902 | 1 | 400  | CastorRegion | 500 | 1 | 0 |
| 015248903 | 015248903-015248903 | 1 | 400  | CastorRegion | 500 | 1 | 0 |
| 015248904 | 015248904-015248904 | 1 | 400  | CastorRegion | 500 | 1 | 0 |
| 015248905 | 015248905-015248905 | 1 | 400  | CastorRegion | 500 | 1 | 0 |
| 015248906 | 015248906-015248906 | 1 | 400  | CastorRegion | 500 | 1 | 0 |
| 015248907 | 015248907-015248907 | 1 | 400  | CastorRegion | 500 | 1 | 0 |
| 015248908 | 015248908-015248908 | 1 | 400  | CastorRegion | 500 | 1 | 0 |
| 015248909 | 015248909-015248909 | 1 | 400  | CastorRegion | 500 | 1 | 0 |
| 015248910 | 015248910-015248910 | 1 | 400  | CastorRegion | 500 | 1 | 0 |
| 015248911 | 015248911-015248911 | 1 | 400  | CastorRegion | 500 | 1 | 0 |
| 015248912 | 015248912-015248912 | 1 | 400  | CastorRegion | 500 | 1 | 0 |
| 015248913 | 015248913-015248913 | 1 | 400  | CastorRegion | 500 | 1 | 0 |
| 015248914 | 015248914-015248914 | 1 | 400  | CastorRegion | 500 | 1 | 0 |
| 015248915 | 015248915-015248915 | 1 | 400  | CastorRegion | 500 | 1 | 0 |
| 015248916 | 015248916-015248916 | 1 | 400  | CastorRegion | 500 | 1 | 0 |
| 015248917 | 015248917-015248917 | 1 | 400  | CastorRegion | 500 | 1 | 0 |
| 015248918 | 015248918-015248918 | 1 | 400  | CastorRegion | 500 | 1 | 0 |
| 015248919 | 015248919-015248919 | 1 | 400  | CastorRegion | 500 | 1 | 0 |
| 015248920 | 015248920-015248920 | 1 | 400  | CastorRegion | 500 | 1 | 0 |
| 015248921 | 015248921-015248921 | 1 | 400  | CastorRegion | 500 | 1 | 0 |
| 015248922 | 015248922-015248922 | 1 | 400  | CastorRegion | 500 | 1 | 0 |
| 015248923 | 015248923-015248923 | 1 | 400  | CastorRegion | 500 | 1 | 0 |
| 015248924 | 015248924-015248924 | 1 | 400  | CastorRegion | 500 | 1 | 0 |
| 015248925 | 015248925-015248925 | 1 | 400  | CastorRegion | 500 | 1 | 0 |
| 015248926 | 015248926-015248926 | 1 | 400  | CastorRegion | 500 | 1 | 0 |
| 015248927 | 015248927-015248927 | 1 | 400  | CastorRegion | 500 | 1 | 0 |
| 015248928 | 015248928-015248928 | 1 | 400  | CastorRegion | 500 | 1 | 0 |
| 015248929 | 015248929-015248929 | 1 | 400  | CastorRegion | 500 | 1 | 0 |
| 015248930 | 015248930-015248930 | 1 | 400  | CastorRegion | 500 | 1 | 0 |
| 015248931 | 015248931-015248931 | 1 | 400  | CastorRegion | 500 | 1 | 0 |
| 015248932 | 015248932-015248932 | 1 | 400  | CastorRegion | 500 | 1 | 0 |
| 015248933 | 015248933-015248933 | 1 | 400  | CastorRegion | 500 | 1 | 0 |
| 015248934 | 015248934-015248934 | 1 | 400  | CastorRegion | 500 | 1 | 0 |
| 015248935 | 015248935-015248935 | 1 | 400  | CastorRegion | 500 | 1 | 0 |
| 015248936 | 015248936-015248936 | 1 | 400  | CastorRegion | 500 | 1 | 0 |
| 015248937 | 015248937-015248937 | 1 | 400  | CastorRegion | 500 | 1 | 0 |
| 015248938 | 015248938-015248938 | 1 | 400  | CastorRegion | 500 | 1 | 0 |
| 015248939 | 015248939-015248939 | 1 | 400  | CastorRegion | 500 | 1 | 0 |
| 015248940 | 015248940-015248940 | 1 | 400  | CastorRegion | 500 | 1 | 0 |
| 015248941 | 015248941-015248941 | 1 | 400  | CastorRegion | 500 | 1 | 0 |
| 015248942 | 015248942-015248942 | 1 | 400  | CastorRegion | 500 | 1 | 0 |
| 015248943 | 015248943-015248943 | 1 | 400  | CastorRegion | 500 | 1 | 0 |
| 015248944 | 015248944-015248944 | 1 | 400  | CastorRegion | 500 | 1 | 0 |
| 015248945 | 015248945-015248945 | 1 | 400  | CastorRegion | 500 | 1 | 0 |
| 015248946 | 015248946-015248946 | 1 | 400  | CastorRegion | 500 | 1 | 0 |
| 015248947 | 015248947-015248947 | 1 | 400  | CastorRegion | 500 | 1 | 0 |
| 015248948 | 015248948-015248948 | 1 | 400  | CastorRegion | 500 | 1 | 0 |
| 015248949 | 015248949-015248949 | 1 | 400  | CastorRegion | 500 | 1 | 0 |
| 015248950 | 015248950-015248950 | 1 | 400  | CastorRegion | 500 | 1 | 0 |
| 015248951 | 015248951-015248951 | 1 | 400  | CastorRegion | 500 | 1 | 0 |
| 015248952 | 015248952-015248952 | 1 | 400  | CastorRegion | 500 | 1 | 0 |
| 015248953 | 015248953-015248953 | 1 | 400  | CastorRegion | 500 | 1 | 0 |
| 015248954 | 015248954-015248954 | 1 | 400  | CastorRegion | 500 | 1 | 0 |
| 015248955 | 015248955-015248955 | 1 | 400  | CastorRegion | 500 | 1 | 0 |
| 015248956 | 015248956-015248956 | 1 | 400  | CastorRegion | 500 | 1 | 0 |
| 015248957 | 015248957-015248957 | 1 | 400  | CastorRegion | 500 | 1 | 0 |
| 015248958 | 015248958-015248958 | 1 | 400  | CastorRegion | 500 | 1 | 0 |
| 015248959 | 015248959-015248959 | 1 | 400  | CastorRegion | 500 | 1 | 0 |
| 015248960 | 015248960-015248960 | 1 | 400  | CastorRegion | 500 | 1 | 0 |
| 015248961 | 015248961-015248961 | 1 | 400  | CastorRegion | 500 | 1 | 0 |
| 015248962 | 015248962-015248962 | 1 | 400  | CastorRegion | 500 | 1 | 0 |
| 015248963 | 015248963-015248963 | 1 | 400  | CastorRegion | 500 | 1 | 0 |
| 015248964 | 015248964-015248964 | 1 | 400  | CastorRegion | 500 | 1 | 0 |
| 015248965 | 015248965-015248965 | 1 | 400  | CastorRegion | 500 | 1 | 0 |
| 015248966 | 015248966-015248966 | 1 | 400  | CastorRegion | 500 | 1 | 0 |
| 015248967 | 015248967-015248967 | 1 | 400  | CastorRegion | 500 | 1 | 0 |
| 015248968 | 015248968-015248968 | 1 | 400  | CastorRegion | 500 | 1 | 0 |
| 015248969 | 015248969-015248969 | 1 | 400  | CastorRegion | 500 | 1 | 0 |
| 015248970 | 015248970-015248970 | 1 | 400  | CastorRegion | 500 | 1 | 0 |
| 015248971 | 015248971-015248971 | 1 | 400  | CastorRegion | 500 | 1 | 0 |
| 015248972 | 015248972-015248972 | 1 | 400  | CastorRegion | 500 | 1 | 0 |
| 015248973 | 015248973-015248973 | 1 | 400  | CastorRegion | 500 | 1 | 0 |
| 015248974 | 015248974-015248974 | 1 | 400  | CastorRegion | 500 | 1 | 0 |
| 015248975 | 015248975-015248975 | 1 | 400  | CastorRegion | 500 | 1 | 0 |
| 015248976 | 015248976-015248976 | 1 | 400  | CastorRegion | 500 | 1 | 0 |
| 015248977 | 015248977-015248977 | 1 | 400  | CastorRegion | 500 | 1 | 0 |
| 015248978 | 015248978-015248978 | 1 | 400  | CastorRegion | 500 | 1 | 0 |
| 015248979 | 015248979-015248979 | 1 | 400  | CastorRegion | 500 | 1 | 0 |
| 015248980 | 015248980-015248980 | 1 | 400  | CastorRegion | 500 | 1 | 0 |
| 015248981 | 015248981-015248981 | 1 | 400  | CastorRegion | 500 | 1 | 0 |
| 015248982 | 015248982-015248982 | 1 | 400  | CastorRegion | 500 | 1 | 0 |
| 015248983 | 015248983-015248983 | 1 | 400  | CastorRegion | 500 | 1 | 0 |
| 015248984 | 015248984-015248984 | 1 | 400  | CastorRegion | 500 | 1 | 0 |
| 015248985 | 015248985-015248985 | 1 | 400  | CastorRegion | 500 | 1 | 0 |
| 015248986 | 015248986-015248986 | 1 | 400  | CastorRegion | 500 | 1 | 0 |
| 015248987 | 015248987-015248987 | 1 | 400  | CastorRegion | 500 | 1 | 0 |
| 015248988 | 015248988-015248988 | 1 | 400  | CastorRegion | 500 | 1 | 0 |
| 015248989 | 015248989-015248989 | 1 | 400  | CastorRegion | 500 | 1 | 0 |
| 015248990 | 015248990-015248990 | 1 | 400  | CastorRegion | 500 | 1 | 0 |
| 015248991 | 015248991-015248991 | 1 | 400  | CastorRegion | 500 | 1 | 0 |
| 015248992 | 015248992-015248992 | 1 | 400  | CastorRegion | 500 | 1 | 0 |
| 015248993 | 015248993-015248993 | 1 | 400  | CastorRegion | 500 | 1 | 0 |
| 015248994 | 015248994-015248994 | 1 | 400  | CastorRegion | 500 | 1 | 0 |
| 015248995 | 015248995-015248995 | 1 | 400  | CastorRegion | 500 | 1 | 0 |
| 015248996 | 015248996-015248996 | 1 | 400  | CastorRegion | 500 | 1 | 0 |
| 015248997 | 015248997-015248997 | 1 | 400  | CastorRegion | 500 | 1 | 0 |
| 015248998 | 015248998-015248998 | 1 | 400  | CastorRegion | 500 | 1 | 0 |
| 015248999 | 015248999-015248999 | 1 | 400  | CastorRegion | 500 | 1 | 0 |
| 015249000 | 015249000-015249000 | 1 | 400  | CastorRegion | 500 | 1 | 0 |
